# Supplementary material for: Klebsiella virus UPM2146 lyses multiple drug-resistant Klebsiella pneumoniae in vitro and in vivo
Source: PLoS One. 2021 Jan 8;16(1):e0245354. doi: 10.1371/journal.pone.0245354 (PMC7794032; doi:10.1371/journal.pone.0245354)
Supplement: S1 Table — (XLS) [file pone.0245354.s003.xls]

## Sheet: Sheet1
contig_id	feature_id	type	location	start	stop	strand	function	aliases	figfam	evidence_codes	nucleotide_sequence	aa_sequence
2146	fig|6666666.475224.peg.1	peg	2146_1_2328	1	2328	+	Phage recombination-related endonuclease Gp46				atgacagatatccttgaaaaatttggcaacctgttaaaagaagctgcgacgccggaagatatcccggttccatttgatgtgcgtggtgatgttacccacaaactcaccttccgtaaggggagggcgaagaacttccgttctattggtaatgaattcatggaaattgattaccaacgaaacccagcaaccctcgtcacatctgatgataatggtgccggcaaatctaccatgctggtctggctattattctttgttctgtacaatgatacttacagcaagaaagagaagaaggccgggctggtaaactctcagaacaaaaaagactgtgtgggagaagtggaattcgcctgccgtggtaatgaatggaaggtccgccgtgggatcaaacccgacttcgtt…	MTDILEKFGNLLKEAATPEDIPVPFDVRGDVTHKLTFRKGRAKNFRSIGNEFMEIDYQRNPATLVTSDDNGAGKSTMLVWLLFFVLYNDTYSKKEKKAGLVNSQNKKDCVGEVEFACRGNEWKVRRGIKPDFVEVHQLVDGEWKQVVNEAAKADMNKYIVNLIGIDQKMFENSLVLGKEKFIPFTEMYTADRRTMVEAIWDLGFFSLMNEDVKAKIKVLNKTLEDISNEFGMKMIDHTNKKTQLAQIIESNNRIQQQSAEILEQERIRLSSLDADISSYQDEMARLQEVEVNTKKEIGEVESRLNQESTEEIENLKAQYAEKMKAVDDIASDKAEDYERIELSSAEQALNDIRDQARKVTERKNEVLNQRNENLNVLNEAMERMRYGEGFRIKFQTEKE…
2146	fig|6666666.475224.peg.2	peg	2146_2331_2651	2331	2651	+	NrdA.1 conserved hypothetical protein				atgaaagtcgtccatttcaagaaggaaccatatgacatctacatcgggagacccggaaaatgggggaacccgtttgaggtcaaagatcatgggcgcggtaattgcatcgaattatttgaagatgatctttaccgacgcttgataaatggagatatcacggaagatgaactccttgaattggacggaaaggtcttagggtgttggtgtaagccgcgcccttgccacggcgatgtttatgtcaaagtggtcaaccgtattaaactattccgattgatgggtaaatcctttgtagagcacttgagacaaacatatgggaaataa	MKVVHFKKEPYDIYIGRPGKWGNPFEVKDHGRGNCIELFEDDLYRRLINGDITEDELLELDGKVLGCWCKPRPCHGDVYVKVVNRIKLFRLMGKSFVEHLRQTYGK
2146	fig|6666666.475224.peg.3	peg	2146_2641_2922	2641	2922	+	hypothetical protein				atgggaaataacatagacgaaatattcgaggcatcaaagattgcatgtgacacctggaatagcaataacccgaagtttcctgtggccattggtgttatttcataccatcttgaaggatatgtgatatttgttgacgggaaaatcaacttttaccgtgatgggcatgaattcaacggattattcaagatcgggaattacaaaacttcatttgatgatcctatggaactggtgtatgcctggttagaatgcatcgaagaatgctataacgccaaatttgaataa	MGNNIDEIFEASKIACDTWNSNNPKFPVAIGVISYHLEGYVIFVDGKINFYRDGHEFNGLFKIGNYKTSFDDPMELVYAWLECIEECYNAKFE
2146	fig|6666666.475224.peg.4	peg	2146_3020_3637	3020	3637	+	conserved uncharacterised protein				atgacgatgacaacgttgaaggccatggctgctttcgtgacctttaccattgccagcgggagtgtgcacgcttcccaaagtacatcacaatgtgactatgatttttctgagcaacaactatccaccatggcgactgcataccacgtaggcaagtcccaatctcttggttacaccctggcagctatatcctggagagagtcccgtgcgggcgaagacgtcgtgtctatgcgatctggtatcaaagccgccaatatgggagcatttcaaaacaaagttcaaagtgttggggatcgggaaggatgtaagaacagaaagtgctatgccaatgtggctgtgaaacttttgattgatcaggagtatgctgccaacgccgcgctggatgagatgaatttctggatg…	MTMTTLKAMAAFVTFTIASGSVHASQSTSQCDYDFSEQQLSTMATAYHVGKSQSLGYTLAAISWRESRAGEDVVSMRSGIKAANMGAFQNKVQSVGDREGCKNRKCYANVAVKLLIDQEYAANAALDEMNFWMNQHNQNVRKSLSSYNAGHARNSKSNSYAADVVKKAKYLQRCVSFKGIPASSKVDPQVIAMNKRTIEKLKRTR
2146	fig|6666666.475224.peg.5	peg	2146_3637_4275	3637	4275	+	phage associated protein				atgaatatcatcccatctcaaacaggttatgagcacctgatggtcttcctggctattcagggagccaaagagggcatcataacttcagaatacagcgggaccgtccgcttgatcgactacacggccagcgaagcatttatcaagaaatgtatcacagcatggaccaaatatgctgttgggacttacccggcccctcctgcgggagaactgttatttgtcgtgcctaccctggcgacaaccgatactgacgagatctttgccgatatgctgtccaaaggatatctggcttatgacacacagcatgatatctatgacttctcagcattgaatcgggtgttcggttatacgatcacttctgaagcgaatatcccagattgggggatcctggcttggggtaaa…	MNIIPSQTGYEHLMVFLAIQGAKEGIITSEYSGTVRLIDYTASEAFIKKCITAWTKYAVGTYPAPPAGELLFVVPTLATTDTDEIFADMLSKGYLAYDTQHDIYDFSALNRVFGYTITSEANIPDWGILAWGKDGLGATYASSDVGPVLIDPGVTMEQYLAQFPQHGVTGSDIIIVYPGSNALERLVSGWDPHLKAVVEGIRFYIPVVNPTP
2146	fig|6666666.475224.peg.6	peg	2146_4384_4659	4384	4659	+	hypothetical protein				atgaaaattatcctcgacgcatatatccactacggcaagaaatatctgatggcgaaagtgtacgacggtgaaaccctggtacatgcccagacccacgaagatgcaaaactccgcgaaattctggcacgtgacttccccggcgttgaagttattgagccgaccaaccaggctgaagttgacaaagagtgggaacgcgaatggagtccggctgcgttggccatcgctgaaaagaactggaacaaccgtgaaaacgccaaccgtccgtttcgtcgttga	MKIILDAYIHYGKKYLMAKVYDGETLVHAQTHEDAKLREILARDFPGVEVIEPTNQAEVDKEWEREWSPAALAIAEKNWNNRENANRPFRR
2146	fig|6666666.475224.peg.7	peg	2146_4670_5017	4670	5017	+	hypothetical protein				atgatcacattaaaagatttcaccaaggacgattatttttgtttcatgggtgccgagaaatttgagaatggggacttaccacgaatttactatttctctgacacggaagtggaagaatttttcgatctgatgggcattagcaacgatcaggacggcggtaattgggcatatctcctgcaccacaatgaaggatttgtccttggttggttctacggggatgaatttcctgaagtctgctggaaagcaggtgacagttccgaaagggttgaatatctgttggaaaaacttgacagtgaaaccctccctctttgggcagcgtcggtcgcctctgctgaacaacgtttttga	MITLKDFTKDDYFCFMGAEKFENGDLPRIYYFSDTEVEEFFDLMGISNDQDGGNWAYLLHHNEGFVLGWFYGDEFPEVCWKAGDSSERVEYLLEKLDSETLPLWAASVASAEQRF
2146	fig|6666666.475224.peg.8	peg	2146_5094_7454	5094	7454	+	phage associated protein				atgtctataccaaaatttttagatttcatgaaagagcgcgaccagttggacgaagcgttcaactccgctccttatgaactcacgatgggcaagaaaaatgccggggacgttttcttcaccttcatcgatgaagatgataaagaataccgtatccaattctataccccgcaaggtctgggtaaaaacgtccgccaggttttcatcggccagaaacgtggttcagtttatcctgatgccatcgctcgtttcaagaacccgatgcgcgttattgccagcatgatcgaagccaccaaacaattcatggcgacgcctctgggcaagactattgatggttatgccgtcaacttctctaagaaagcgctggatcgtggtatgaccctgatcccgaaaatcattcgt…	MSIPKFLDFMKERDQLDEAFNSAPYELTMGKKNAGDVFFTFIDEDDKEYRIQFYTPQGLGKNVRQVFIGQKRGSVYPDAIARFKNPMRVIASMIEATKQFMATPLGKTIDGYAVNFSKKALDRGMTLIPKIIRQSGLKQKLNVMDLTYAPVPDRGYVWLVKKGKDPAQVFDGPKMQGITWDDPDKVGDVPVQNNTPEVDVPSPVDDSNGWKLTSGGDQPMMIWSGREKGRLVTANIAPHYNEPGVYVGAYMNEKPARGPSPDFITRQLKLPQIPVKMLNSFTTASTKFWRDNKPNTQTTLDEIPTTDMGQEGLRDGGYIARLLGIIDTYAPQMVGMYSGEKLTRVGAGRYKTSGGLVIEVHFWGVDKGNLAVEVYSELSGTEMLSLSGKTKDAGMKIVE…
2146	fig|6666666.475224.peg.9	peg	2146_7509_8075	7509	8075	+	hypothetical protein				atgaagacctttctggaattctttactgaacaagcagcgcagcctgtgatccatgctggtgtacagggcaaaagtgttaccatcaaaaagcaagctgacggcactcagtggtgctctggtactgttacccagatcactccggacaacgcagctgacacctataacctggagctgaccgatggtaataccgtcaaagcagtgctgaccccggaccaggtacacgcagtgtctcaggggcaggaagtcgtagccgttcatgacggtttcgaattcttctttggtaaatctgctgacaaaggccaggtcactgaagcatatgctcaggaactcgccaatatggacaaaatgatcggtaaggcgctgggcgtcggtaaatctcgcaagagcgggcgtaccgag…	MKTFLEFFTEQAAQPVIHAGVQGKSVTIKKQADGTQWCSGTVTQITPDNAADTYNLELTDGNTVKAVLTPDQVHAVSQGQEVVAVHDGFEFFFGKSADKGQVTEAYAQELANMDKMIGKALGVGKSRKSGRTEFEYSGIPGIGKSVAIDFGGEDDPYVIVTMGGKQQDISKGKTLAADIAKYLGVKPV
2146	fig|6666666.475224.peg.10	peg	2146_8085_8513	8085	8513	+	hypothetical protein				atgagagggttccaggacttcttgacagaagccaagcaagttggttggcgtttggccaagacggactacacgtgctcccttgtgtacgatagcaaaggtccgagctattcaatctatcaaggtaagacgcccggtgtgttctatggtcacaaatcccctagtggttcggccatcaaaggcgacccacaggagttggccaagaagttgaatcttccccctatcccagaagatctgcttagatcattcctggaaggggttaagaagctgaaaactgaagcaagcattgactatcaagaaattggcgaccgtaaattcagacgaaaagatggttcttggatagaactcattccggctgatgagcacggtgaattacctccagccacgataacgatcagccca…	MRGFQDFLTEAKQVGWRLAKTDYTCSLVYDSKGPSYSIYQGKTPGVFYGHKSPSGSAIKGDPQELAKKLNLPPIPEDLLRSFLEGVKKLKTEASIDYQEIGDRKFRRKDGSWIELIPADEHGELPPATITISPEMAKDLGLG
2146	fig|6666666.475224.peg.11	peg	2146_8564_8917	8564	8917	+	MobD.6 conserved hypothetical phage protein				atggtcaatgcaagtgcatttatcaaccgtggtctgctggcgatagcacacacccatgctctccacttcgtcacgcactcatattcgaaacataaggctctcggggagttctatggggacctcgaggacttgctggataccttcaccgaagcatatatcggcgcgggcgggacttatactcccggattcgagaacaccaagttgtttaatccagacccgatccaatatatccagagcatcgttatcgacgtcgacgccatttatcggcagtgcgattctcatctgcaaaatacattggatgaaatcaaaaccctgtgttttcagactctttataaactgaagcaactggcgtag	MVNASAFINRGLLAIAHTHALHFVTHSYSKHKALGEFYGDLEDLLDTFTEAYIGAGGTYTPGFENTKLFNPDPIQYIQSIVIDVDAIYRQCDSHLQNTLDEIKTLCFQTLYKLKQLA
2146	fig|6666666.475224.peg.12	peg	2146_8974_9468	8974	9468	+	hypothetical protein				atgacatgcatatctgttcctcattatatcgttcgttccaacaaacatgatcttagtggaaccccagcagtgtttatcaaatcacagcactatattgatacgtttctgaaatacgtagttggcggttggtatatttacaagaaaaccaagcattttgcttccatgaatattatttccgtgtctgatccatacgtgatagacgagtctaatagcctcccgataaaatgcctgactctccctgacgtgaagaaatgcgaagacctcgccaatgcacacgaacgtggggttgtatgggatcacgtctcggattatgagaggttaattcaacatgcttatcctaatttggatttcatcatggatgaaagaaaaggtgtattgtgttttcgtatttgggctatt…	MTCISVPHYIVRSNKHDLSGTPAVFIKSQHYIDTFLKYVVGGWYIYKKTKHFASMNIISVSDPYVIDESNSLPIKCLTLPDVKKCEDLANAHERGVVWDHVSDYERLIQHAYPNLDFIMDERKGVLCFRIWAIDIECVDYSSQKLLFINEADALSAVELFRSAM
2146	fig|6666666.475224.peg.13	peg	2146_9468_10076	9468	10076	+	conserved uncharacterised protein				atgggcaagatcttcgttccaactcatttagaaggctgtcagatttcagccaaatatcttcacaagcagatgaattgcggtgccgtatttgtcgaaccgaatcctcataccaattctgaatcccctgatgcaatcggtttccgccccgatgggtgcagtattttgatcgaggtcaaagtcagccgggatgatttccgagcagatgccaagaaacctcatcgcatcaatcctgagcaggggatgggcagctatcggttttatgcatgtcctgagggagtcatccgcatcgaagatctaccaccaaagtgggggttgttctatttcacgcctcgaaaatcattgaaggctatccatgtcccagacatgcagatatcttccctgtattctccccagcactat…	MGKIFVPTHLEGCQISAKYLHKQMNCGAVFVEPNPHTNSESPDAIGFRPDGCSILIEVKVSRDDFRADAKKPHRINPEQGMGSYRFYACPEGVIRIEDLPPKWGLFYFTPRKSLKAIHVPDMQISSLYSPQHYLNMIARRSPNGKMPPYLLHYQKMVEDFGHVVKNTVAEHNILYGAWRQLCIAQTRGVAYTVNEVFQRPNI
2146	fig|6666666.475224.peg.14	peg	2146_10076_11140	10076	11140	+	Phage-associated DNA primase (EC 2.7.7.-)			isu;Phage_replication	atgaaatttcttgacgagcaattcataaattatctggcaccgcgcctggagcgtttctcatgggagcgcgtaggagccgtcgccaagttccgttgccctctgtgtggggactccaaaaagagcacgtctaagcgccgtgggcatttcttctatgaccatgatgacgatgtctatcggttcaagtgccacaactgcaacgagatgagcggttgggcttttgagttctggttgaagaaattcgatgaccgtctgtacagcgagtacagcatggagaagtttaaggtcatgggggacacccgcgcccgcccggtgcaaaagctggcacccctgaagaaactgacacagacggcgcgtatcggtcaacaagtggcgaagcgggatgaggaccacctcggcaat…	MKFLDEQFINYLAPRLERFSWERVGAVAKFRCPLCGDSKKSTSKRRGHFFYDHDDDVYRFKCHNCNEMSGWAFEFWLKKFDDRLYSEYSMEKFKVMGDTRARPVQKLAPLKKLTQTARIGQQVAKRDEDHLGNMIRLDLLDPTHFARQYVEGRGMPESALSLLYFSENFRKDLLNFETDPEKQKKIPDDPRLVIPFWTQDGRMKIVQGRAFGDNLPEGMLRYATVKPRNEDTKVYGEERILMNRVKLVVEGPLDSLFLPNCLATADADLLSAKGDIYVPDNQYRNAQVCDGIQKMIDKGVKVILFPPEIRWKDINDMVNPNKGNIPIRDLLKIMADNVYQGLAASLRFADLRKV
2146	fig|6666666.475224.peg.15	peg	2146_11140_11352	11140	11352	+	hypothetical protein				atggatatgaaagaacttgataaactggatgaccaggagatcctccggggataccagcaaggccgagccgggtatgttctcagtggttatgaatcaccgagtttcgtacatggatggcgcaatggggtagttgattctggggtgtgtcagcctgatgctgatcagatggatacggcaagaaactatctgaagcaactacgagaacaaaaataa	MDMKELDKLDDQEILRGYQQGRAGYVLSGYESPSFVHGWRNGVVDSGVCQPDADQMDTARNYLKQLREQK
2146	fig|6666666.475224.peg.16	peg	2146_11533_12021	11533	12021	+	putative uncharacterised protein				atgaaaactatcaaaaccatcatcaccaacggctctgtatctttcgaactgaacaccgaagtttccaaagcagaaatgttccgcattgcacaggaagccggtttccagggcggtaagacctccttcatgaacctgctgagcggcaaaactgaaactgcttgcggcttcaccatgaaagaccagattgtggttgaccaggcggtagtggctaaatcctctgacaaagtcagcatgctgaaaatgttcggcctgaacatccacatcgtcgaagcgaagaccgaaacctatggcaccctgaacgtcggcaaaggccgggtgcagctgaacccgctgaacaacggaacctactcggtgatggtattcccgaaaaaaggctacgacaacacagatatcctgaaa…	MKTIKTIITNGSVSFELNTEVSKAEMFRIAQEAGFQGGKTSFMNLLSGKTETACGFTMKDQIVVDQAVVAKSSDKVSMLKMFGLNIHIVEAKTETYGTLNVGKGRVQLNPLNNGTYSVMVFPKKGYDNTDILKAVGGDSKSQYVKMGKLTLIEVQNMIERLA
2146	fig|6666666.475224.peg.17	peg	2146_12078_12275	12078	12275	+	hypothetical protein				atgactgcttatgagatgtgtatcaacaacattgcattacagattcaaaaactgaaaccgtcggaaattaatccggatattccgaatgcgttcgactattcaactggtatttctgccggattctgtaaagatcctaaagaagttgtgtgtgacatagtcgtggcagtcggcaaacttgggaagaaaacagatgagtaa	MTAYEMCINNIALQIQKLKPSEINPDIPNAFDYSTGISAGFCKDPKEVVCDIVVAVGKLGKKTDE
2146	fig|6666666.475224.peg.18	peg	2146_12268_12441	12268	12441	+	hypothetical protein				atgagtaatgaagtccagctgtccgaaggcgccaaatggctcgtgaagcggatcccgaataagaactttgaggcgttccaggctgaattggtcgccgtgtttgagaagtatggctatgacgagcaattgcgtctggcatacaacgaagacaagcctctgatcgtccgacgctga	MSNEVQLSEGAKWLVKRIPNKNFEAFQAELVAVFEKYGYDEQLRLAYNEDKPLIVRR
2146	fig|6666666.475224.peg.19	peg	2146_12507_13301	12507	13301	+	Putative phage-encoded peptidoglycan binding protein				atggccattttaaagattggcagcaaaggtctggaagttaagaatcttcagaccagtctcaacaaaatcgggttcaatctggttgccgatggcatatttggtaaagcgactgacaacgctgtcagggcagttcaggcaggtgccggactggtcgttgatggtattgctggccccaagaccatgtatgctatacgcaacgcaggggagtctcatcaggatcatctgactgaggctgacttgattgacgctgctcgtgaattgtctgttgaccttgctagcatcaaggcagtcaaccaagtagaatcgcgcggtactggcttcaccaagtctggtaagatcaagacattgtttgaacgccacatcatgtacaaaaagctgaatgccaagttcggtcaggca…	MAILKIGSKGLEVKNLQTSLNKIGFNLVADGIFGKATDNAVRAVQAGAGLVVDGIAGPKTMYAIRNAGESHQDHLTEADLIDAARELSVDLASIKAVNQVESRGTGFTKSGKIKTLFERHIMYKKLNAKFGQAKANALAQLYPTLVNAKAGGYTGGDAELERLHGAIAIDKDCAYESASYGLFQIMGFNCVICGYANAEEMFNDFLTGERAQLMAFVKFIKADANLWKALKDKNWAEFARRYNGPAYAQNQYDTKLAAAYKSFS
2146	fig|6666666.475224.peg.20	peg	2146_13336_14043	13336	14043	+	putative homing endonuclease				atgaactataacaaaatttataattcgcttatcaataaagcaaaaatgcgttctctaaaaggatatcatgagaaacatcacgtcattccgaaatgtttgggtggttcaaacgacacctccaatttggttaaattaaccccagaagaacattacgtcgctcaccttttattaataaagatataccctcatgagccgaaattagtctatgcagcaactctaatgagcggcaaaaataatcatatcaaaagaaacaacaaacagcacggttggttaagaagaagggcttccgaagttcataagcaaaaatatttgaacaaaccagaattaaaagaaaggtttgtcaaaagattaataaaaatgcacaaggacaatccggaaataagaatacaggcttcacaa…	MNYNKIYNSLINKAKMRSLKGYHEKHHVIPKCLGGSNDTSNLVKLTPEEHYVAHLLLIKIYPHEPKLVYAATLMSGKNNHIKRNNKQHGWLRRRASEVHKQKYLNKPELKERFVKRLIKMHKDNPEIRIQASQRLKAKYEETPDWMDSVYDKMKGVPPWKSPSSTPKTLKIWKDADKYYQWWLDNQTGYCLMAKAFGYKGKSGPHKNMVDKFRSGWIPRKDTIWLEFVNQYTDSV
2146	fig|6666666.475224.peg.21	peg	2146_14089_14931	14089	14931	+	PhoH-like protein				atgcaatctgcgagcaaagtagtatccatgaagccagctggtaaaaccaaatcagcgcgcaagaaagaagtaacccagcgcgaagatgaatggatgaagttctctaaaggtgatttcaaaatcgctccattccatggcctctctgacaaccagaatctcgcctaccaatctgcccttgaaaacaatctgaccatcacaatcggacctgctggtacgggcaaatcttattgcggtgctgccgctgctatcaaacatcttattgatcgccgtgtcagtaaaatcatcatctctcgttcgccgttgccaaccggacagactgcggggttccgccccggcgacacgtatgaaaaactcgtcccgtatctgcgcccgctgatcgaaaccttcaagaaagttctg…	MQSASKVVSMKPAGKTKSARKKEVTQREDEWMKFSKGDFKIAPFHGLSDNQNLAYQSALENNLTITIGPAGTGKSYCGAAAAIKHLIDRRVSKIIISRSPLPTGQTAGFRPGDTYEKLVPYLRPLIETFKKVLKTDTGSDGFFNYLWEKHIIEIQDLETIKGMTFDDAFLIIEEAQECDMEQLKNLLTRSSDSTYVFVNGDIKQSNKRLRDSALDTYVKAFRDFNQKLEAGTLAVHGVEPGDAYPDWVQPFSIIEFNKDDRNGRGNFTRLMLEVNDLYDI
2146	fig|6666666.475224.peg.22	peg	2146_14998_15657	14998	15657	+	putative homing endonuclease				atgaattaccaaaacatttatgactctttgataaaaagagccaaaacaaggtcattggttggttattctgaaactcaccatattatccctaaatgcttaggagggaaagacaataaagaaaatttggttgaattaaccccggaagaacattatttggctcatcaattattggtcaaaatacatcccaaaaattataagttagcgtttgccgcaaatgctatgtgtatcaataatgatagatcaggccgatttaacaataaattatttggttggttacgacgtaaattatcagaatcaaacaaatctatgtatgaaaggaatccggaattaagagatgtccgttctaaaagaatgaaattaacccatgaagaaaatccccatctaagaaaggtgcaatct…	MNYQNIYDSLIKRAKTRSLVGYSETHHIIPKCLGGKDNKENLVELTPEEHYLAHQLLVKIHPKNYKLAFAANAMCINNDRSGRFNNKLFGWLRRKLSESNKSMYERNPELRDVRSKRMKLTHEENPHLRKVQSERLKNSNIQVPRNPWDSNRATKESLDIWKHAEEYYNWWKLHQQGYTSMAKAFGFKNKTTPHETMVKKFKSGWIPQEDPEWLDFVSQ
2146	fig|6666666.475224.peg.23	peg	2146_15719_18004	15719	18004	+	Ribonucleotide reductase of class Ia (aerobic), alpha subunit (EC 1.17.4.1)			icw(1);Ribonucleotide_reduction	atgagcgacatcaaagtcataaagcgggacggatcttctgtcccttttgatattgaaaaacttcacaccgtcgttgaccgcgcttgtgatgggctggacggggtttcaatgtcagaggtgattgcagcatcaaagatccaattcaccgataatatgagaaccgaccgcatccaggatattcttatccaggcggctgcgtctctcatctctgtagaaaagccgaactatcagtatgtcgcagcgcgtctgaagtcatacgatctccgcaaaatcgcctatggtcagtacaagccgccccatctgctggatatctttgtcaagaacatcaaactcggtaaatacgaccgggaattcctggatctgtacaccactgaagagtttgatgaacttcaggccacc…	MSDIKVIKRDGSSVPFDIEKLHTVVDRACDGLDGVSMSEVIAASKIQFTDNMRTDRIQDILIQAAASLISVEKPNYQYVAARLKSYDLRKIAYGQYKPPHLLDIFVKNIKLGKYDREFLDLYTTEEFDELQATINHKRDKNFTWAAMGQLTEKYLLRDRSQKDKKVYCETPQVMYMAIAMALFSNWDKASRLDMIKKFYNYASTGKFSLPTPIMAGVRTPTRQFSSCVLIKTGDTLDSINATAKSIVDYVSKRAGIGFDVGAIRGIGSPIRGGEMVHTGLVPFIKYLTGALKSCSQGGIRGGAATAYIPLWHYQFDDVVVLKNNRGTEENRERRIDYGVQINRVMFERLVNKQPLYLFDPKDNMDMYEAYFSDVDQFRTLYDNMIKAADAGLCRAKTLQ…
2146	fig|6666666.475224.peg.24	peg	2146_18079_19182	18079	19182	+	Ribonucleotide reductase of class Ia (aerobic), beta subunit (EC 1.17.4.1)			isu;Ribonucleotide_reduction	atgtctgaacaaaagcaattttccgtattcgacccgacatcgaataaccagggactcccgttctttggtgatccggtatcaatccagcgttatgacgttgttgcttggccgtttgtacagaagtggtatgaaaaaggcctcagccaattttggcgcccggaagaagtagacatcaccaaagacaaggcggattttgccactctaagcgatggtgaaaagcatatctatttctccaacctgaaacggcagaccatgctggactctatccagggcgcggccccgtttgaagcattcggtgcctgggcttctaccccggaggcgcagttcgctatcctggaatggacccgccaagaggcaattcactctctgtcctacacccatatcctacgcaacacggtc…	MSEQKQFSVFDPTSNNQGLPFFGDPVSIQRYDVVAWPFVQKWYEKGLSQFWRPEEVDITKDKADFATLSDGEKHIYFSNLKRQTMLDSIQGAAPFEAFGAWASTPEAQFAILEWTRQEAIHSLSYTHILRNTVNDPGIVFDHVLDVAEIVDCAHQISTCYDESVRWAGMRMAGRIFTREDIMNAKRSFWRSLFAANTLEGIRFYVSFACSWAFVQFLQKMEGNAKIIRQIARDEQDHLILTQTFLNRLPLMDPDFAVIREELRAEMTQMFMDVVNQEKQWADYLFKEGSILGLNAKILHQMVDWLATHRMGAIGHPYPGEPRKDNPVPWINDWLDNTTMQYALQEAEAPDYLMGILTGSVSDGLKFA
2146	fig|6666666.475224.peg.25	peg	2146_19192_19416	19192	19416	+	Glutaredoxin, phage-associated				atgattacgatctattccaaacaaggttgtgcacagtgtgttacagctgagaacatctgtcgcattcgcggtattgagcatcgtatcctcaaacttgaaaaggactacaagttggaagatctacaagctctgacgggcaaacaacgcatgtcaatgcctgttatcgttctcgctgaccagactgtgaccgacgttgctggtctcgccgcaagcgttaaacgctga	MITIYSKQGCAQCVTAENICRIRGIEHRILKLEKDYKLEDLQALTGKQRMSMPVIVLADQTVTDVAGLAASVKR
2146	fig|6666666.475224.peg.26	peg	2146_19511_19963	19511	19963	+	hypothetical protein				atgtcaaatatcttacgcaaccccggccatcattttggatacatccaactcccgttggtcatcgacactttataccctgaagacaaagaagccgtttgctggtctccagcggccctcattgaacgagagatattcaaatcagaagtcgacgtgatgtatcgctttgggacaaatggcgaactttattatttgggtaaagccatagaattgcgtacgacgagagagcaacgtttcttacgcatagacacaacggattgtggtttgttctcccaactacaagaatatgtgaaacagaatcgtccagtttcccagcaccgcccgttcttgtcaagtgtgcatattgacaactttatctctgacgttcaccttgtggcttctactcttcacgatgaagaaact…	MSNILRNPGHHFGYIQLPLVIDTLYPEDKEAVCWSPAALIEREIFKSEVDVMYRFGTNGELYYLGKAIELRTTREQRFLRIDTTDCGLFSQLQEYVKQNRPVSQHRPFLSSVHIDNFISDVHLVASTLHDEETGVPNDTVLNMVVITLVE
2146	fig|6666666.475224.peg.27	peg	2146_19970_20338	19970	20338	+	hypothetical protein				atgagcgatttagtcttgaatacccaattccgtcttcctgtggattctcttgtcccgtttcaaatcatgaaacagatgcttgaagaaggcatggaagttccgttaaaacataatggacaagatatcgggcgctgtatgagttgctcatttcaggatgatgcgtattgggcaatggactataatgctcaaatgccaattgaggctaacacactcatggaattgggtttcattttcaaattaaaaccaccaattcgtttatacgatatcaagcctgtggtaatacagatacctgctggcaaatcaacttacatgtacttgatatcgcattttatgttttatgacgttgcgccgtcagttggtccgttgtaa	MSDLVLNTQFRLPVDSLVPFQIMKQMLEEGMEVPLKHNGQDIGRCMSCSFQDDAYWAMDYNAQMPIEANTLMELGFIFKLKPPIRLYDIKPVVIQIPAGKSTYMYLISHFMFYDVAPSVGPL
2146	fig|6666666.475224.peg.28	peg	2146_20701_20321	20701	20321	-	Phage baseplate wedge subunit (T4-like gp25)				atgaaagattataaagatgtggacctaaaatttgggatgcatcctgttaccaaagacgtcacgatgaaatctggaaaatgggctgtgttacagtctgtccggaatattgttatgtcgtcggcaggcgaatggcggactctcccagatatgggcgctggcctttatgggatgctcggggaaaacacgacgcctactattcaggtggatgtgaagaacaaagttgaagatgctattgctctttatgagccaagggcagaactacagtctgtcgaagtatctctgtctgatgactaccattccctggcagtcaccattacgtttaacgtcgtgaatgatcctgaaccgattactgacaccatctggttacaacggaccaactga	MKDYKDVDLKFGMHPVTKDVTMKSGKWAVLQSVRNIVMSSAGEWRTLPDMGAGLYGMLGENTTPTIQVDVKNKVEDAIALYEPRAELQSVEVSLSDDYHSLAVTITFNVVNDPEPITDTIWLQRTN
2146	fig|6666666.475224.peg.29	peg	2146_22375_20765	22375	20765	-	Phage baseplate hub protein (T4-like gp5)				atgttagaaaatatgcgttggttttatgggcgcgttgaagacgtgaatgatcccgaagaaaacgggcgcgttgccgtccgtgtatacggcgtacacacccaagacactactctcctgcctactgagctgttgccatgggctgtgctcatgatgcctgcaacaaatgcgtcctcggcaggtttaggctggtctccgactggcattactgtcaacagtgaagtcatggggttcgcccttgacgaagcataccagaatttgagaatagcgtgggtatggccagcagccaaccaggttaatggttctgacaccaacccgttggctctcggccaggttgtgcagtctattgaacgtcaaaaatataatgctgttacagatgttcctgtaaaaatagaagacgaa…	MLENMRWFYGRVEDVNDPEENGRVAVRVYGVHTQDTTLLPTELLPWAVLMMPATNASSAGLGWSPTGITVNSEVMGFALDEAYQNLRIAWVWPAANQVNGSDTNPLALGQVVQSIERQKYNAVTDVPVKIEDEPQPDPEPPKDGYDPEKWMTVARGELGVKEYAGKFNNNPRIVEYHKTTSLGASEDEVSWCAAFVGWVLLQAGFTSTRSALARSYLQWGSPLSEPRYGAVVVFRRGNNPTFGHVAFVQKFDANYVWCLGGNQSDSVKVSRFSRSSVLGYRWPGPANTTAAAPAQQNSKWSEPIPDRTPKVQETPPPSGRVQDIDNTGETIVPSAGGSVYPYNNVMASRSGHIMEVDDTPGGERLHWMHQSGSYKQMLPNGDVVNKSVKDHYDIAMFDK…
2146	fig|6666666.475224.peg.30	peg	2146_23683_22880	23683	22880	-	Phage baseplate hub subunit (T4-like gp26)				atgaatttaccatcattgcctcgtacagaaagaacgctcaaaagccaattttggcctactgttatcaagtatcgcgcgtttactgcggggcaacaaacttctttacttcaggtggctgacccaaacactcctgatgatgaacgtatcgcaacgatggaatcattattttcgtcttgtgtagacgctggggttccattttccaaactcccaatcggtgttgtagaagaagttttccttcggatgcgttgtatatcaatcggtgaagtaatgaaaatccggtacaaatgcaacaaccagatcaaagttccttcggttgatcctgattatcctggggacaatttagaagcatgcggtcaagaactcgttgtacctatccccctggacaaggtggcggcgcgg…	MNLPSLPRTERTLKSQFWPTVIKYRAFTAGQQTSLLQVADPNTPDDERIATMESLFSSCVDAGVPFSKLPIGVVEEVFLRMRCISIGEVMKIRYKCNNQIKVPSVDPDYPGDNLEACGQELVVPIPLDKVAARGVEGFTECFDLPGGYHIKMRQPSFSDAGVLQKVVSIEESIATFIDCLYDDDGQVWRFDDPNEPGIDPQVAVARKKTRDEFVQWVGDNLETDIIQKIKDDFFSKIPRIHFETKIKCPGCGKEHKIEFNSLEEIFI
2146	fig|6666666.475224.peg.31	peg	2146_23733_24263	23733	24263	+	putative uncharacterised protein				atgcatggtttctgttttagccagatcggagagcaattgacaatacttcatcctgatgctggtactgatttctatttattcctgtcggattatgcgaggcatttgggtgtagacaccatcgcaatgtctaaagatgacatgaaatttggtaaactggggacaaaagatttattgagatatggattcaatgtcattgtagtagatcctgtctatagtcctattcaggatgaagacgttatacccgtgggtgtgcacaggaatattgaaacattacacaaatattatcccgattgcatcgtgatcggagagatcattccgtattttcataaaagaagacgccttcaaacgattaaaagttattttcaagaaggccaagcgtccgttattatggatgtcctc…	MHGFCFSQIGEQLTILHPDAGTDFYLFLSDYARHLGVDTIAMSKDDMKFGKLGTKDLLRYGFNVIVVDPVYSPIQDEDVIPVGVHRNIETLHKYYPDCIVIGEIIPYFHKRRRLQTIKSYFQEGQASVIMDVLTSGWVVKSTTGNSQQINSRVYEYVKERDYELENSNAKRKTRRS
2146	fig|6666666.475224.peg.32	peg	2146_24235_24723	24235	24723	+	putative uncharacterised protein				atgcaaaacgaaaaacgcgccgatcttgagcagttgaaaacagttatcatcaatcgcttaaaggccgtcgtcaccaacgataaaggtgaagtagcaccagggtttgaaggtattttcgatgaattccaaaccgacgacatgggtaatccggtcatccaaaccgtcgccgggatgatcatgatcgataaagagatcctggaaagcggttctgttcgttattcaccgaacatgggtgttgaagccgaatccctctgttccgaagtgatggacattaacgaagcgatcagtgaaatcgggtacaaactgcttatctgtaccggccattatgttgatcctcaggggcagatcgcttatggcgatgaagcgcgtaaagtgaaacgccacgttgaaactagtgtt…	MQNEKRADLEQLKTVIINRLKAVVTNDKGEVAPGFEGIFDEFQTDDMGNPVIQTVAGMIMIDKEILESGSVRYSPNMGVEAESLCSEVMDINEAISEIGYKLLICTGHYVDPQGQIAYGDEARKVKRHVETSVLLNTIREMQKEQESIKPRLILPDSKIVTR
2146	fig|6666666.475224.peg.33	peg	2146_24763_25374	24763	25374	+	hypothetical protein				atgggtatttttatgaaatattgcggaattgactactcttatggttgcccagcgatttgtgtctgggacgacaaagatcctttggaatttaattcccttcgcttctatgcatattacacggtagaaaaatattgtcgccctattcgaccgaacatcagtattatgaagcaacctgcatattcctcccctgaagaaagattctataacatttccaaatgggcagaagctgttcttcttacagagaaacctgatttcataaccctcgagggttatgcgatgggcaactctaagaactccaataatatatgccaaaccgctgagaacacttctcttttgaagcaagcaatgcgccgtaataatatggaattcgaaatcatcactccttcttataccaaaaag…	MGIFMKYCGIDYSYGCPAICVWDDKDPLEFNSLRFYAYYTVEKYCRPIRPNISIMKQPAYSSPEERFYNISKWAEAVLLTEKPDFITLEGYAMGNSKNSNNICQTAENTSLLKQAMRRNNMEFEIITPSYTKKNFTGKGTADKLAMIAHFEKLFNVNMRGIMDMLEVKDPKPIDDLVDGFANMVGGSAFKENHPEFNSEVHNG
2146	fig|6666666.475224.peg.34	peg	2146_25367_25663	25367	25663	+	hypothetical protein				atggttgattattggttattggcgaatattatcacgttcgcattattgatggcgacggcgttcgtttggttaaaggcgatgctgacattcttgtcttcgttggcgatgcaaatatcgtattattctgtgacaccgcatgaagaccagaatattcgggctgctcaacagagcgaatatctgtccaaatatgttcatttacgcgaacgctcggtcacaatcgttttgttttccacaatgctgtttgcggttatcttatttgtacgatatgtaatggaggccatccatgccgttctatga	MVDYWLLANIITFALLMATAFVWLKAMLTFLSSLAMQISYYSVTPHEDQNIRAAQQSEYLSKYVHLRERSVTIVLFSTMLFAVILFVRYVMEAIHAVL
2146	fig|6666666.475224.peg.35	peg	2146_25650_25895	25650	25895	+	Regulatory protein, FmdB family				atgccgttctatgattatgcatgcaaaggatgtggtcattctttcagccagcgcaagacctgtgctgagcgccatactcctgaacttgatccctgcagcgaatgtggtggtcagatttctatggtaattggcgctccaaaaatcgtttccggtgtccgtggtcctcaatctgctccggacgggttcaaagatgttcttcggcagatcaagaagacatcgggtaaggggaacacaatcgatgtctga	MPFYDYACKGCGHSFSQRKTCAERHTPELDPCSECGGQISMVIGAPKIVSGVRGPQSAPDGFKDVLRQIKKTSGKGNTIDV
2146	fig|6666666.475224.peg.36	peg	2146_25888_26130	25888	26130	+	Gp33 late promoter transcription factor				atgtctgatggacaaatcgctcaggttttgacgcctgattcattttcagagatggtattgatgcgcgcgcagaccaccagggaaagcctcctggaaacaatggccagcgtgtgcgaagagtatgatatcgaggaatctaagattcgcaagatgattacaccgcctctgttatcccgtttaacagctgagtgcgctgatgctcgtttgttgaaaggtgaactgaaatccaagaaaattttatag	MSDGQIAQVLTPDSFSEMVLMRAQTTRESLLETMASVCEEYDIEESKIRKMITPPLLSRLTAECADARLLKGELKSKKIL
2146	fig|6666666.475224.peg.37	peg	2146_26140_26379	26140	26379	+	hypothetical protein				atgactaaagaacaagtctacaaattgattaaggcccaaggcttcttgcctggtgttacccgctggcgtgtgggtagtcttaacgagcacgaagaccaaactgaccggatcaaattcacgactccggaaggcggtgtgtatgtcgtggaataccatacccacaccgatgccaaacgcactttgtctgacgtgttcgatatcattgagattaacccgaaagaacaattacttcgcggttaa	MTKEQVYKLIKAQGFLPGVTRWRVGSLNEHEDQTDRIKFTTPEGGVYVVEYHTHTDAKRTLSDVFDIIEINPKEQLLRG
2146	fig|6666666.475224.peg.38	peg	2146_26476_27522	26476	27522	+	Single stranded DNA-binding protein, phage-associated			isu;Phage_replication	atgtctagcttatttgatcgtctgaagcaatcccgtggtcagcaatctgacgctctgcaaaaacgtctggaacaacagggccagcgttcggctgcagcaaaggatccgcgtatctggaaatggacctggaacaaggaaggtatttccgaaaacatcatccgttttctccctatcccgctggtagatctgaaagcacaggaagaaggcaagatcgatgctgagcagattcttactccggttgcgatgatcatgcgtcattccttccaaggtaagggcggctggtacatcgaaaactctcctcagaccttcggccacgaagatccggtgcgtgatcatgatcgcccgctgtgggcacaacaaaaagagaccaacgacgaaaaactgaaagaagttctcaaa…	MSSLFDRLKQSRGQQSDALQKRLEQQGQRSAAAKDPRIWKWTWNKEGISENIIRFLPIPLVDLKAQEEGKIDAEQILTPVAMIMRHSFQGKGGWYIENSPQTFGHEDPVRDHDRPLWAQQKETNDEKLKEVLKGRLPNTKYYANILVIKDVNSPENNGKVFLLEFGPAIKKFLDAAQNPKFATDPKFDPFDMWGGANLILNLVGEKRKFGNWEGLVPVMDNVKWDAVSSLGGEGEEGDKYKEDIWEKEHSLFEFYNPANFKSYEELEKRLRKALAIPDSQPLVESGAATVATAPVHQEPQRPTAQDSLNQQQSQPSQAQQSVQTPSSTGADAKHTSSLDEFEQFLKRE
2146	fig|6666666.475224.peg.39	peg	2146_27565_27969	27565	27969	+	hypothetical protein				atgaaatccatcttcgtaaaaatttgctctattctgatatctatcctggttgttgtgtccctggtttccggttatgtcgatatcggaatcccaccatttgatggtcttggggtggcgctggtttacgtcaacatcgtgttgttgatattgttatctatatttcttttgctcactttggcggaaggtggtaaatccattctgaagcaagaaaaattattgggtcaaaagacatcatatgcgtggcgtaatacagagtcaacgatcatattcgttgtagtggcgttgacaggacatattataaccgctgtgttgtatgctatcgcaattgtcatctatcgggcgtttgaatataccgcccgcctagaatacaaaaagttgactaccgtaagtggtaacgac…	MKSIFVKICSILISILVVVSLVSGYVDIGIPPFDGLGVALVYVNIVLLILLSIFLLLTLAEGGKSILKQEKLLGQKTSYAWRNTESTIIFVVVALTGHIITAVLYAIAIVIYRAFEYTARLEYKKLTTVSGNDK
2146	fig|6666666.475224.peg.40	peg	2146_28940_27993	28940	27993	-	Phage baseplate hub protein (T4-like gp54)				gtggaagactatcgcaattttattacacagatgttgcagcgcggtctgtcaaggaagaacagattccaggtgactatccccttgcctgcaggcatctttgactctaatgctacattagccaatgatggtcaagcctacacctcagatacaacgtcatttggtgacttgttccgttccacagcgcgtatcgtaaacgcattctttggggggacaaaccaaacctctcgttctctccaaatgatgtgtatggttgcgtcattacctggtgtcggtatcgacacgacacctatgaataataacggcaaccatatcaaaatgccgaacaacaaatcaaacgttgatttggaactctcattccttttggccaatgactattatgaaaagtctgttatggacaaa…	MEDYRNFITQMLQRGLSRKNRFQVTIPLPAGIFDSNATLANDGQAYTSDTTSFGDLFRSTARIVNAFFGGTNQTSRSLQMMCMVASLPGVGIDTTPMNNNGNHIKMPNNKSNVDLELSFLLANDYYEKSVMDKWKNLIFDPLTTKMGYYEDFVTDICIEQLDTEDQVVHRVYIVEAHPVNFSSIELDKGATDQFNQYNISFSYNKVLSETEYETRSLASDFLPLGIADALASGDWETAASKAGQLYKKLEQGNFTGEALLAYKQLDQLVNNMAGISLADFERISIGIQRDILGNDNLTASEKSSLLGMLKRVGSN
2146	fig|6666666.475224.peg.41	peg	2146_28994_29701	28994	29701	+	Gp2 DNA end protector protein				atggcaaagaatgcgatgggtgaagaagatccgctgctgcttccagccgaaatggatgctcccgaattggtgaagcgctacatccgaaagtaccgccagcacttcggggccgaagccaagcgtaatattcgccgctcccacgtgtggttcatggaacgtgtgtctaaggatgccaacctgaccccacagcatatgatgaaagcatttgctgagaacaagcgcccggtacagggtgtccgctatatgatcggacgcatgttctatttcaaatatgatgccctgacaaaagaagagttaccatactgggacatgtatcccttggtatttttcttcaattttgccaagggggatgggattaattttggtgagcgtggcgtgacttatctatgggggcttaac…	MAKNAMGEEDPLLLPAEMDAPELVKRYIRKYRQHFGAEAKRNIRRSHVWFMERVSKDANLTPQHMMKAFAENKRPVQGVRYMIGRMFYFKYDALTKEELPYWDMYPLVFFFNFAKGDGINFGERGVTYLWGLNLHYLPPKLRLLVFEDLIKLRNERAYRSKTRLRLTWDALKRFANHPLYEHCVKLYRADRFRTQLYEIEPQYWEVVLFMRTARFQKQSQASVWKDARMRHKPKK
2146	fig|6666666.475224.peg.42	peg	2146_29768_30511	29768	30511	+	hypothetical protein				atgtctactatgtatcgtattcttggtattgagtttgttcctgctcgtctggatgccaccatccccatctccaaaggtaagaccgggtttgaaatcggtcgttctgttttctatgaaactcatatggcccaaccgaatttcgaaagtatggtcgccggtatgggaatcagtttagattctgaagcatgctatgacatgcgtgaccttctccgtatcggcgacagcgatatgctcgattttacccaagacttcgtcactggttgggttcattcagccgagctgaagaatcaggcgaataaaacgatggcatgcttccactttgcttcggattatctgaagtcaaagaatcgtgaacttattttccttgaaaacgagttattggaatgcctgggcgaaaca…	MSTMYRILGIEFVPARLDATIPISKGKTGFEIGRSVFYETHMAQPNFESMVAGMGISLDSEACYDMRDLLRIGDSDMLDFTQDFVTGWVHSAELKNQANKTMACFHFASDYLKSKNRELIFLENELLECLGETDNIPIVISSEKGLSESDLRTVLAVGKSTIVKNGNILFNDGQHPFDLPAKIVYNDEICRSITKFFGKINSALYDGIAQLMEEESYNQKVLKIREYVSANCMGGEDPYLMPNFFDQ
2146	fig|6666666.475224.peg.43	peg	2146_30534_30845	30534	30845	+	putative uncharacterised protein				atgagaaggtatttgaggcttaatacagttctagaatcattgatagaattttatatcttacaacatctccgttcaggaaacgagcacattgacgacttcctcttgtatgatcaccagataacgatccattcagttgaagtcgttgatgacgatctgctcctggccaacatagagcacagtctgtatgataaccaggcgggtaaatactgtgctccggcattttctcaggtagagataacaccatgctggcctgccgaaaaagttttcaatatagacgatgtggtttatgatgaagcgaactctttcagatag	MRRYLRLNTVLESLIEFYILQHLRSGNEHIDDFLLYDHQITIHSVEVVDDDLLLANIEHSLYDNQAGKYCAPAFSQVEITPCWPAEKVFNIDDVVYDEANSFR
2146	fig|6666666.475224.peg.44	peg	2146_30983_31894	30983	31894	+	putative uncharacterised protein				atgtcttacattctccatattgagtccggcctgaaatttgatattgaaggtaaaactgcgtctgacgtccagtccgaaatcaaagacgctggtctgctgatcggtaacgtaaccatccgccgtatgctcgacggcgtcctgcaaagtgccaatggttttgagctgatcgattccctgtctcaagaagagcaggaagaaaccctggaggctctcgaccgtgcgaaggccgaagaagtccagccgactgacggcgctggcgtgaaagaaggcgctggcgatgccactccggttattgacgctgaagaaaccgttaaccagccggaagcggaacaaactgcaaactccgaagaatctacggaaactgctgaacaggctgacccgcaggaagtagaagctgtg…	MSYILHIESGLKFDIEGKTASDVQSEIKDAGLLIGNVTIRRMLDGVLQSANGFELIDSLSQEEQEETLEALDRAKAEEVQPTDGAGVKEGAGDATPVIDAEETVNQPEAEQTANSEESTETAEQADPQEVEAVANADEVRRRILGTNVAEALAEGSNAAEDASLAAKSKLTNLTPAVAPEDRKRRHNKREEMVEAARSSNFGAILAAVEAGVIPGVYLSYVNPDMRWFQFPVTDLADKENPHARTNTYVDLAPITSGGWGFSLYVKGKSFTKRQKIKETDAESLVKAINEWLPGALEEAKNAG
2146	fig|6666666.475224.peg.45	peg	2146_31969_32631	31969	32631	+	putative uncharacterised protein				atgtcttatacgatcaaaggtctgttgaaaagacctgtccatttgttccataaaccgcctgccgttgtcggggaatatccggcaagaggagagctttattatgtcaaaggctccaacggtagtggcaagtctaccgttccgtcctggatggcggagaatgatcctcaggcatatgtcgtgacccacaatggtaaggtgatgctgaccgtttgcccatcatttaatatcatctgtgtcggcaaatatgacaaatctaaatctaaaggggttgactctctaaaagacacagagcagatgctattcgccgtgtctatcaccgagcaacctgaatacatcgggtatgatgtgatctttgaaggtattatccctgctaccttgctcaatacgtggattgaacgc…	MSYTIKGLLKRPVHLFHKPPAVVGEYPARGELYYVKGSNGSGKSTVPSWMAENDPQAYVVTHNGKVMLTVCPSFNIICVGKYDKSKSKGVDSLKDTEQMLFAVSITEQPEYIGYDVIFEGIIPATLLNTWIERLNRPTRRLVVLFLDTPKEVCLARVSSRNGGEDFKHELVLEKWKRVNSHRERHKELFPNIPAGMMKSNGLTVDQAVSAFLNRDFGSID
2146	fig|6666666.475224.peg.46	peg	2146_32631_33674	32631	33674	+	Thymidylate synthase				atggaaatttttgctttaaacaacaacgacatgctgaagaaagctgtcctggctatccgtgaacatgggattgagtctgatcccggtaatgcggagattaatactgatggcacccggtttcttgatggcgtgaccataaccgtctcagacatccgtgaccgctggctttccgttgaaggtcgcaattcttctgcgctggctgctattggcgagaccttctgggttctgtcaggccgcaatgacatccgtttcctttcccgagtactcccccgcgcggccaacttctctgacgatggtgtaacctggcgcggcgcgtatggcccacgcctgtacaatcacgggcagctggatagcgttatcagccgtctgcgcaagaatccaaatacccgccaggcttat…	MEIFALNNNDMLKKAVLAIREHGIESDPGNAEINTDGTRFLDGVTITVSDIRDRWLSVEGRNSSALAAIGETFWVLSGRNDIRFLSRVLPRAANFSDDGVTWRGAYGPRLYNHGQLDSVISRLRKNPNTRQAYLTIYDPALDSDEGLAAHNETGEAKTKDMICNLALLFSIKNGCLNMTVINRSQDVLWGMSSINFIEFSILQEVIANVLGVNVGQYKLFSYNLHYYNNEVSRKQLGGITWKTQTSTGGLVCSLLSFNRDKVKNQNDIRNLFLGVLHHCDIGSDFGKVREHLSQFDADKGLMLDMAYCLWCRLNDSKIDKRSIADDGLRTALMHSSVDRKYIWGQGE
2146	fig|6666666.475224.peg.47	peg	2146_33671_34237	33671	34237	+	putative uncharacterised protein				atgatgtatcctaatcttgaatttttcacggggcgcaagcgctccggtaaggacttctgcctggagtccattattgaagcagaccggggtatccgtgtcgttcatcgtctttctttctctgatgagttgcgccgggtggccaattacatttacccttggctcccggttgacgtagatgattccatcaaggatctgccgttctcacatccggataacgtacacaacctgtcgccaaggcagatctggctccatctgggcaacgataagggtggtttgcgctatgtacaacccgatctgttcctggcgttctttaaacgcttccagttgcctctcgtggaggctaatcctggtgtgcactatatcgtgagcgacctgcgtactccgcaggaatataattgg…	MMYPNLEFFTGRKRSGKDFCLESIIEADRGIRVVHRLSFSDELRRVANYIYPWLPVDVDDSIKDLPFSHPDNVHNLSPRQIWLHLGNDKGGLRYVQPDLFLAFFKRFQLPLVEANPGVHYIVSDLRTPQEYNWALSTKCPITRISKPNRSGIVEDDVEAYIDQMVVDYDYVNNFEGRNNFVEFYRNRK
2146	fig|6666666.475224.peg.48	peg	2146_34234_34788	34234	34788	+	putative dUTP diphosphatase				atgataacagcagatcatattaaaagtctgctcgaactccaaaaggccactaacgtggcctactttggggaagagtggaaaaacgtatggagccaaaacgcagtcgtcaactctatttatcgtgaatgggcagaattcctcgatgaaacgactgctgattggaaggtttacggtaatgacatcgggtttcaccatacgaacgcagtttatgaactggtcgacgtggttcatttcatgttgtgcttcgttctattggaccgcaccaaaggcgagatcgaagaagaatttgaaattcttgatagccgcgaattcactccatttgctttgggtgctgttggacatcgaggtgtgacgtaccgccttgggcagttcatggatgacccttgtgttgagactctc…	MITADHIKSLLELQKATNVAYFGEEWKNVWSQNAVVNSIYREWAEFLDETTADWKVYGNDIGFHHTNAVYELVDVVHFMLCFVLLDRTKGEIEEEFEILDSREFTPFALGAVGHRGVTYRLGQFMDDPCVETLMFFLSSACSYMEIDIETYMLAHKRKNDRNRLRAAGGADYDKSTEIPLTLEF
2146	fig|6666666.475224.peg.49	peg	2146_34788_35306	34788	35306	+	hypothetical protein				atgtttacgattaacatctccatctcggccgataaccttgagtcatcggttagcaatttcattgagcacatgaagcccttgggacatgtgatactcaattgcacattagacgttgaaggcggggttgcggagatgttatttacgacaccctctccaacagacgcattcgtcttaattgagcgctgggcatcggaggacattcctgttccagcgccgttgcaggatatctatttcagtgagacgatttattcactccataccatgcccaaagatgttagccaggctgatattgttcgtctgattaatcataacatgaactttgggtgtatcgttcggcgtgataactatcgtttacgcaatcatttcctgtatgataaccagaacaaagtggatgaagat…	MFTINISISADNLESSVSNFIEHMKPLGHVILNCTLDVEGGVAEMLFTTPSPTDAFVLIERWASEDIPVPAPLQDIYFSETIYSLHTMPKDVSQADIVRLINHNMNFGCIVRRDNYRLRNHFLYDNQNKVDEDSLLSIKSMQEAINILSKKVLGAELLTTINKQEEVKWPVH
2146	fig|6666666.475224.peg.50	peg	2146_35291_36376	35291	36376	+	UvsX RecA-like recombination protein				atggccagttcattaatggatcgcatgttgaaagttgctaagaaacatgacgatcaggcttcggtattgtctcagtcagacgcgctggacccgaaaattatctgctcgactggtattccccttattgatatcgcctggtccgggcgtgttgatggcggtctgatctctggcatcaaaatgatggtcggtgattctcgtacatttaaaacgatgttcggcctggttgacgtcaaagcgtacatggataaattccccgacgcgatctgtgtattcgccgattctgaaaagggtgccaacgcagactactggacatccatgggcattgacatggatcgtgttctgtatgtcccgatcgataacgttgaacagaccaagatccgtctgttgcagattcttcag…	MASSLMDRMLKVAKKHDDQASVLSQSDALDPKIICSTGIPLIDIAWSGRVDGGLISGIKMMVGDSRTFKTMFGLVDVKAYMDKFPDAICVFADSEKGANADYWTSMGIDMDRVLYVPIDNVEQTKIRLLQILQEVKKGDKVIVFIDSISQLPSTKEVEDAIAGKDTQDMTRARALNSFWRVITPEINSKELVLVWINSYYDEIGNQYAEPNIKGGKQGFLSSNLIWFITRSQVKEDKDLLGWNFNIGIMKGRHVKEKAKLPVTVLYDGGIDRWSGMLEISRALGYVDMPTSGWYVRTAKGGFDPEKEKKYQKRQMDDDFWYPLLENPDFADDVKKMFGVSNGTVMPANMLEQMDHVINTSE
2146	fig|6666666.475224.peg.51	peg	2146_36354_36683	36354	36683	+	hypothetical protein				atgttatcaacaccagtgaataacaatggagggggagtcatctcccccgttaattacgaactcatcgaccccggtgaaggccaaatatccatcgtccacattttggagggccaattccgtggtgtcaaattccgtattgggaaagtatcctgggaatggtctgatgacgcaccccggcttatttttaccacggatattttgaagaaaccttggcgtcttttctttaatgatttgaaaaataacgacttgttcactgaagtgtcaggccgtatcttattagacttaatgcagaagaacgctcaggaatacaacaaaattttggtggggtag	MLSTPVNNNGGGVISPVNYELIDPGEGQISIVHILEGQFRGVKFRIGKVSWEWSDDAPRLIFTTDILKKPWRLFFNDLKNNDLFTEVSGRILLDLMQKNAQEYNKILVG
2146	fig|6666666.475224.peg.52	peg	2146_36690_38117	36690	38117	+	DNA primase/helicase, phage-associated			isu;Phage_replication	atgttactcgaatctgtcgtgctttcccaattgatttacaatgaagaataccaaagaaaaatattgccttacctgaaagccgattatttcgaaaatgaaggtgagaagattatattcggattaattgacgattattcgtcagaatataatgctcgcccttcggttgatgctctgtctattatgctggagaagactccgctcaacgagcatgtgtttgaacaatcaatcgccgctctttctaatatcaatgacaatacattcaatcaggaatggttggtaaaagaaactgagcaatgggcgcgcaataaggctgtgcacaacgcgataaaaacagctgttaacatctatggtgacaacaagcggcaggaggagatgaataatatccccaccatcctgcaa…	MLLESVVLSQLIYNEEYQRKILPYLKADYFENEGEKIIFGLIDDYSSEYNARPSVDALSIMLEKTPLNEHVFEQSIAALSNINDNTFNQEWLVKETEQWARNKAVHNAIKTAVNIYGDNKRQEEMNNIPTILQEALSISFDSYLGHIYWEMAAEQYDHMNSAEAKIPFAVEIFNKATRGGVGKKTLNIVTGAINAGKTTTLIDLAAGYSEQGLNVFVFTLEVAENIWRHRLDARIMRRDFEVVEKMTREEYIGTIQKLRTRDNGSLKGDIVIKEYPSGAGHTGLYRRDILEYISSTGISPDVIIIDYLGESASSRLPAHLMNNTNVYYTSVAREFRALGFEFDCPVWTGMQFNREKQSATDGDISDLADAIGIPKVADFIMAFYAPDELAAVKKARASI…
2146	fig|6666666.475224.peg.53	peg	2146_38180_38515	38180	38515	+	putative uncharacterised protein				atgttgcacaataatttcatggcggatctgctacgcgccgttgagcaggtgtgccacaccaagaaggatacgatcaatctagacttcgctcagactatcgaattctttaaagcacgccatacttggaaagaccacaatgtgaaagtaatggcgcaagaaggggaattggttgaactcgatttgccatcattccctttaccggtacggaccgaaactcaggaacaatacgaaattgaaggcgttcgcattattcctaagtttggttatcatagtatcgtttacttcttcctgagccggattggggcaaatatcatcccgaccggaatgcgtatctaa	MLHNNFMADLLRAVEQVCHTKKDTINLDFAQTIEFFKARHTWKDHNVKVMAQEGELVELDLPSFPLPVRTETQEQYEIEGVRIIPKFGYHSIVYFFLSRIGANIIPTGMRI
2146	fig|6666666.475224.peg.54	peg	2146_38529_38843	38529	38843	+	putative uncharacterised protein				atgtctgtagaacaaattggtttttatgaaatcccgaacgacccggcgctgcgcaagaaactgtttgacaccatcgaaaactgccgcgccgcccaagtccgtatcaaatcagaacagacgtacatcactgatgcactgtctgaaatcggtaaggcgacaggcatcaaagcagctgatctgcgtaaagtcgtgtcagaccgcgccgctggtacttacaccaagacaatcgaaaccagcgccaaataccaggatctctacgaatccctgttcccgaacgccgcgccggatcgcgatccgaatacttccggcgaatga	MSVEQIGFYEIPNDPALRKKLFDTIENCRAAQVRIKSEQTYITDALSEIGKATGIKAADLRKVVSDRAAGTYTKTIETSAKYQDLYESLFPNAAPDRDPNTSGE
2146	fig|6666666.475224.peg.55	peg	2146_38962_40155	38962	40155	+	conserved uncharacterised protein				atggacgccaaaatctaccagatcccgctggacaatgtcgtaattgtccaggaacgcctgcaaaaattagagcgcacggcaaatcgactggggctggtattcccgacggtgaccatcagtgaaccatacagaacccaacacaaagattctacgtcaggtgaaattttctatcgttggtggcgggacatttctcttgaaggtgaaggcattgaccgcccggtttcatacggcggctggtctatcatcggccagttcaatcatcaatacccaaaggtcattctcaacaaactgaccgacgacatcgtcccgcatttcattcaacggttcgaggcagaaaacgtctcgtggtgtgagcattgcaataaatcagttcgccgcaataacacatatgtggttcgt…	MDAKIYQIPLDNVVIVQERLQKLERTANRLGLVFPTVTISEPYRTQHKDSTSGEIFYRWWRDISLEGEGIDRPVSYGGWSIIGQFNHQYPKVILNKLTDDIVPHFIQRFEAENVSWCEHCNKSVRRNNTYVVRNETSGAQMLVGSSCMHHYVPHQKSLDAVMGYYLSIQELFNNQDEDGIYGSHIPTTADTRSYLRLVFQILLTGVSIKSNLYSVVMGCFVAGEAPKDKTSEAWEIYQKAKGFYFDALSEMDHMMEFIASLPQTNDFNVRLTRMCEAGYHLIKDSTTVRWGAVKYYEYLHRECSRANKAETRWVGEVGEMIEKTVTYVDRKFLYSGDWGDSYLYIFKTEEGSTITWKTSYIDADLEGQMVIRGRVKELTEYEDVKQTQITRAKLRTL
2146	fig|6666666.475224.peg.56	peg	2146_40152_40292	40152	40292	+	hypothetical protein				atgacattgttagaaatgaatgctgcggtgttaacaaaattcatcgcaggtgaactcaagatcggactcgccatatttggtatcactaccgttgccttggccatatgggttctgatctatctgattaagaggaaaggttga	MTLLEMNAAVLTKFIAGELKIGLAIFGITTVALAIWVLIYLIKRKG
2146	fig|6666666.475224.peg.57	peg	2146_40292_40504	40292	40504	+	hypothetical protein				atggaatgttcatgtggagggcaggggacgagttcttacacccgttaccccactgtgaaggaagccgaagctgctggattccgcgtagaaaaggctccctgtgtaatcgccttgaaagactgtccggtctgtaagaggcactctcaggacgtctggtatgagccaggcgctcaaccaaagacagttaatttgctgtctatgatggggaaataa	MECSCGGQGTSSYTRYPTVKEAEAAGFRVEKAPCVIALKDCPVCKRHSQDVWYEPGAQPKTVNLLSMMGK
2146	fig|6666666.475224.peg.58	peg	2146_40506_40847	40506	40847	+	putative uncharacterised protein				atgttcaagtttcttaagaatcttttcgtaaaggaattgagcctggaggtcaagtatctcgtcgatgccatcgataatgatctggtgacgatggctgaaacgaaatatctctgtgccaatcccgttatgtataatggcgtccgtgtctatgcatacaccgtcaacaccccttccggttacacggttgatctggacgacaggcaggattgtttaccaagacatgaagccaaggcggtttaccgggcattgtgtgctcacaccaagcggtttcgtgaaagaaattcccggaagcgtgaaatccaaaaccgcgaattttcaaaatctaaattgggtggattatga	MFKFLKNLFVKELSLEVKYLVDAIDNDLVTMAETKYLCANPVMYNGVRVYAYTVNTPSGYTVDLDDRQDCLPRHEAKAVYRALCAHTKRFRERNSRKREIQNREFSKSKLGGL
2146	fig|6666666.475224.peg.59	peg	2146_40844_41032	40844	41032	+	hypothetical protein				atgaaagacgttactgatgaccaattgaaggagatgtggcggcaaactcaaattatcgcccacaagaaaatgaaaactatccgagcgctcgaaaatgaactcggggaacttaccaaggactctactaatttagaggtcgaattaatcaagcgcggttatgttgtcaagcgccgtttttgggaatactga	MKDVTDDQLKEMWRQTQIIAHKKMKTIRALENELGELTKDSTNLEVELIKRGYVVKRRFWEY
2146	fig|6666666.475224.peg.60	peg	2146_41034_41375	41034	41375	+	putative uncharacterised protein				atggcaactctcgtagaaacattatttcctggctgcatcgttggccgtgggtgttctgaggccaatggattggaagcagacgtagaaccgaagaactgtatcatcattgataagttccatgacaatcattatccattgaaccaccgtcgtgaccattatctggtgttggtcagtggttgtcttgtatccttgcgtatttgccaggccatggatggatccgggtatggtgcatttgcctatatccatgatgtatctaatggtgcgttaggacaagaaacgctgctagaaaaattcaatggatggaaagaatcgttcacttcttgtgaaccaccgaaagaataa	MATLVETLFPGCIVGRGCSEANGLEADVEPKNCIIIDKFHDNHYPLNHRRDHYLVLVSGCLVSLRICQAMDGSGYGAFAYIHDVSNGALGQETLLEKFNGWKESFTSCEPPKE
2146	fig|6666666.475224.peg.61	peg	2146_41433_42041	41433	42041	+	e.6 conserved hypothetical protein				atgtcactgaaaaacttactgaaacgcatcttcaccactgttgaagccaacgtcactgcagggcttgacaagctgaccgatacagaaaagcgcctgaacctggccgctcgtaaactgtcagacgaaatccgccgcctggaagaagcccgtgtatccaatgtgcgccaggctatcaaaatgcgcaagaccgcggaagagaacctgggtgaagctgatatgcgtgaaaccgcgctgaaagatgccatctctcgtggtgtgaatcctaatcgggcggatgctctgattatcttacaccgccgccgcatcggtgaagccctgttggtaaaagttactgatatcgaaaacagtaacaaagaactgaataaggccatcatccaactcggcgataaatttgatgaa…	MSLKNLLKRIFTTVEANVTAGLDKLTDTEKRLNLAARKLSDEIRRLEEARVSNVRQAIKMRKTAEENLGEADMRETALKDAISRGVNPNRADALIILHRRRIGEALLVKVTDIENSNKELNKAIIQLGDKFDEIKSSLELVRIQKETNELGLSLPEDVDYAAGMVNIDVDAILREAEISDPKYSVNSPSTIEADNYLASLIK
2146	fig|6666666.475224.peg.62	peg	2146_42083_42640	42083	42640	+	hypothetical protein				atgatcatcattgatgggaacgatattatatgggggttggcagttttatctctcgtattcgcagcttttcaatttttcaaaggtgttcaaatggagaaaaatgaaaagaaggccaaagtttgttggaggtacactgacctgcccagtctgaaatacgctttgtcgatacgtaagagaaaggatgacgattattttcaccggacggactttagtttggatgcacggcacccagatacatctgccgttgaatacttctattatacgatggacggtttgaagtggcctataataggggatatcgtgttaaaaaatgattgtatctcttgtagggtatatcccacagacggtgattggatccgggtttggtttttcaattttagtgaagaacttgaattcacc…	MIIIDGNDIIWGLAVLSLVFAAFQFFKGVQMEKNEKKAKVCWRYTDLPSLKYALSIRKRKDDDYFHRTDFSLDARHPDTSAVEYFYYTMDGLKWPIIGDIVLKNDCISCRVYPTDGDWIRVWFFNFSEELEFTKKLFDLFKEYEESGCKPAHSDEPIESIIRRARGKELNELEKYGFSWGDELCQ
2146	fig|6666666.475224.peg.63	peg	2146_42637_42813	42637	42813	+	hypothetical protein				atgatcgcctattttgtgctgtatatgacatatgcggcaggatttttgtatatggtgctgaacactgatgttatctgggagtttatccataaacagtatatgaaaatcaaaactcgctatactggagtggatatcgattcgatcatcaaacaagctcgatcccgcacccgccaataa	MIAYFVLYMTYAAGFLYMVLNTDVIWEFIHKQYMKIKTRYTGVDIDSIIKQARSRTRQ
2146	fig|6666666.475224.peg.64	peg	2146_42869_44290	42869	44290	+	DNA ligase, phage-associated			isu;Phage_replication	atgattcctctgttagaagcaattcacactcttcgtgagaccaaaggcaccaatgccaagaaagaagtcctgactcaaattttgaaagaaaatccggacatggtcgattttcttcagtatgtgtatgacccacttctttcttattaccgtacaaagtttttaccgaatgcgttccctcgtatgctgtcgcgcggcgtcgtcggtagctgggatcaggtgtacgatgttctcgaccagatgagcgaacgtaccctcagcgggcagaaagccgatcatgaattatcgaaagcggcgaccaatattcacccggattaccacgaactcatccagatgatcctggacagggacattaaagccggtattgctgaaaagggcatcaatgcggcattcaacgcagcg…	MIPLLEAIHTLRETKGTNAKKEVLTQILKENPDMVDFLQYVYDPLLSYYRTKFLPNAFPRMLSRGVVGSWDQVYDVLDQMSERTLSGQKADHELSKAATNIHPDYHELIQMILDRDIKAGIAEKGINAAFNAAGGTGRLINVLPYHRYDNMTIDLLKKMDFRRGVYSQLKSDGMFANIICRYGKEPEIRSRSGSLIAGGSVDNLSLVFKDIIYDAGVGESVFHGELLVVDLKQNAILPRAVGNGKLNSVIQTGEPLPEQFQVIYRVWDIVPYEKWFNAERVDIPYEARYNIISQMFDDDGLVQVQETRVVHSFAEAVEHFKDALSRKEEGTICKAADMPWEDGTSSQGLKLKMEIECDLEIIGFNPADAKGKHSKTFGSLLCKTSDSLLIVGVSGISDD…
2146	fig|6666666.475224.peg.65	peg	2146_44292_44549	44292	44549	+	hypothetical protein				atggatacgctattcaccctgatgtgtacaatgactttcgcgctgtccctggttatcagctcgttgtgtgccttgctggtgtggatagcgttccctgacgttgccaaatataaaatcttcatgtttttagccattattgtcatgagttttattttaacaattcactatgccaagcaggattataatcctgacaaacgttatgcgtcattggcggagagatatcatggcttcgaatttaaagacattaccagaaaatga	MDTLFTLMCTMTFALSLVISSLCALLVWIAFPDVAKYKIFMFLAIIVMSFILTIHYAKQDYNPDKRYASLAERYHGFEFKDITRK
2146	fig|6666666.475224.peg.66	peg	2146_44741_44953	44741	44953	+	hypothetical protein				atgtgggtgaacaggagaaacaaaatgccgaaattaccaaagaccgctaagaaaaatccaacggtatctatagagcgtttggggtggattcattataataccgtgcagttcatacatgataatggcctcggtgaaaagtatcgtgaattcatggaatccaaggcgcttacatttaaacaatcccgtattcggaggaaacaaaatggtaactga	MWVNRRNKMPKLPKTAKKNPTVSIERLGWIHYNTVQFIHDNGLGEKYREFMESKALTFKQSRIRRKQNGN
2146	fig|6666666.475224.peg.67	peg	2146_44943_45605	44943	45605	+	Phage DNA helicase loader			icw(1);Phage_replication	atggtaactgaatgggaaaagatggaatatgaacgggcgtttaacgtttattgtatctttatggccatcaaactccatttcacgaccaaggattatgattacggtctctatggcccgatgagcaattacaaattcgaaacattctttgccaaagaaggtatgcggaaacagtttgctcgattggcccggcggtttgagacttctcaaggcgaagttgttgagaattatatcatcgcaaatttcataaagtcacccaagacctgggtaacgactttattgactcggcaggcgcaagagaattataacgaataccggaagctgtatgacaacttcacataccacttccttgacttttttgaaaagaatatgattccagaaattgccggacgcggtctcacg…	MVTEWEKMEYERAFNVYCIFMAIKLHFTTKDYDYGLYGPMSNYKFETFFAKEGMRKQFARLARRFETSQGEVVENYIIANFIKSPKTWVTTLLTRQAQENYNEYRKLYDNFTYHFLDFFEKNMIPEIAGRGLTFLDYLKGDGQNHPALLTDIIMKKYPIWFLVGLNKITGFIAFYDKLLKEDIYWNSEAFLLKKTDAVVPNENTDYARNKFREMILSHGI
2146	fig|6666666.475224.peg.68	peg	2146_47593_45608	47593	45608	-	hypothetical protein				atggctgagccagcacaaacatcccagactgaagttgctcaagttcttgacaagatcaagaaagagatcatggagaggaaacaactccgcgctcaaaatgagaccaacaagcagctggtgaagatgaacaaaaatctggagaaactacagactgctgaaaagcagaaagatgttccagaattccagttcaaaattccttcggtcaacgacttcgtcaatggcttcgctcgagtgagtccgatattcactcgagactatggtatttggatgaaagataccgttgatgttgctgttgatggtaacgaagagttgatgaaaatcggcgagaaggttgaccgtcttggggaccttatccgccagcccgctgatgataccaatactgaatatttgaacctgata…	MAEPAQTSQTEVAQVLDKIKKEIMERKQLRAQNETNKQLVKMNKNLEKLQTAEKQKDVPEFQFKIPSVNDFVNGFARVSPIFTRDYGIWMKDTVDVAVDGNEELMKIGEKVDRLGDLIRQPADDTNTEYLNLISDQLKAANDDSLKRLDNQEGTLVGISSDLNRIGDTLDEVRWNTEGIDKNSSEQLVRLSSIEKKIGKTGGHIVNALVRIFDSNEKWREKEEMRRGEEGKEGKNNPRATSIIPKDDDQKDENSSGIGAAIAAMLGLNALKGFLLKPFKAIGWAVGAFIGMFSKIGEGIVKLLGPFGKVLKFLKIGPLALISSVFEFGKGFINAKEILGKASVTIVDRVRAGITELVGSFGDLFDWVSKIFGFDTDMGKKFRQFTLWISEKPAEWLNSI…
2146	fig|6666666.475224.peg.69	peg	2146_48992_47604	48992	47604	-	conserved phage associated protein				atgattgagaacaaagagtcacaagacggtattttaaccccgtccacgacgtttgatttgaaatatatggccatccttcctcatacaccggaaggaggaaccccaacgccatatgatctgacttcattattccaagaattcaatatctatcaagatttgggtttggaagagaatgtttcaccatcattgacagccaatgtgttgatcaaagaaggctgggatattctggacacaatgcctatccttggtggcgaagaagtcgtgatttcattcaaatccccggcggctacagattacaccgcattatcgttccgggtcagccgggttgggcgtgtcgctgatgagtcaaattcttcagccaagaaagcgttctggctgcacctggtcactactgatgca…	MIENKESQDGILTPSTTFDLKYMAILPHTPEGGTPTPYDLTSLFQEFNIYQDLGLEENVSPSLTANVLIKEGWDILDTMPILGGEEVVISFKSPAATDYTALSFRVSRVGRVADESNSSAKKAFWLHLVTTDAYKDSMLRKSVGLQGSYSDMAAKIFEMLESRTKFEDIDPTYGIQERFATPLWPVLKSIDYMARRSYDEIFMPFVFYEDFTGYHFKSLTTLFNQGNQTMTAEEKQEAALEKKFFRDPQDAPLLQNNNFNSERFMRTIIKAEKKLARDQFMANYHDVLAVDERVYDFRTKTVTPTSRVYTEWFAETAHLDPYPLFSDEFNRENVRYLEAQPDGAEQVDYAKRVIKFSLASTVMRLLLVGDNRLNVGQVYYIEDLSNRPKQNENLAELSK…
2146	fig|6666666.475224.peg.70	peg	2146_49546_48989	49546	48989	-	Phage baseplate wedge subunit (T4-like gp53)				atgaaattctttgagaaattccccctcgtctggcatcagctaattgattgtcagcaggatgatcaggttctattacagaacctatcgcgccgtgtgatgatcatacagaagattaaggacatcgaagggcttctcctgccttataacatttatgatggggaaaccccaaggtcctttgcagagcgtgtctatggctccttcgagctgttttggataccatgtatgatcaacagcataatggatatcaataacgactggccaaagccagagcaacggatcgttgaagaattgatcgctcaatacggtctggacggtatgtgggatatcaaatactatgtagatcagtttgggcatgaaacagatgccagagctatccgtatggcctacggtctggacggt…	MKFFEKFPLVWHQLIDCQQDDQVLLQNLSRRVMIIQKIKDIEGLLLPYNIYDGETPRSFAERVYGSFELFWIPCMINSIMDINNDWPKPEQRIVEELIAQYGLDGMWDIKYYVDQFGHETDARAIRMAYGLDGMDDSQIIANYGLTGISYHDDAINKNQAKRAIQVLDPDYVSMFVSQLEQELSK
2146	fig|6666666.475224.peg.71	peg	2146_50529_49561	50529	49561	-	Phage baseplate protein (T4-like gp48)				atggcgaatttcaagtctaccctggataagatcaaagttctgaacaccaaaggcttgacacaggcccagaaacaattggtctatccgctggatatcaccgggggtaaaacccttggccattatgttctgttcaacatcaacaggatctctggttcttcttacggaagcaccgcaacacagacggttcagaaccctatccagaacccgctgggtaatacccctgtcgtgtatggtaccaaatcagggtccatcagcaaatatgcctgggcacgtcacgttcgttctaacgagtccattgtcctgtgtatgccagaatccatcactaccaactatggcgttggctggaacggctctgagttgggtctcgctggtatgggtgcccaattcctttcccgcgct…	MANFKSTLDKIKVLNTKGLTQAQKQLVYPLDITGGKTLGHYVLFNINRISGSSYGSTATQTVQNPIQNPLGNTPVVYGTKSGSISKYAWARHVRSNESIVLCMPESITTNYGVGWNGSELGLAGMGAQFLSRAAQDMSQFKLGDALNVGKEMGRFAATKAIQSASESIPFLPTINAHDTLELFTGTMTNPYVEMIFQGVRNREIPFTFKFTPRSQKEAKMVREIIRLFKMHMYPEYKYNKNSSAFYLHPSTFDITFMVQGERNKWLHRISTCVLSNMFVNETPDSSYAVHKDDSIVSTQIDMTFIELEPLHKGRFDTEGDSF
2146	fig|6666666.475224.peg.72	peg	2146_50583_51200	50583	51200	+	Phage head completion protein (gp4)				atggctatgtatcttcaggggaaatatgcccccgtaaatcccaagaaatacaaaggtgacattcataaaattgttttccggtcttctctagaactggtggcattcaaattttgtgatacaaacccggctattgtctattggtcatccgaagaaactgtcatcccttatatttcaccagtcgatggtcgaccgcatcgctattttatggatttgaaagtatggactagatcacccaatagtgaagaactcaagatcacgttgatcgaaattaaacctaaagatcagattaaagaaccgaagaaaacgaagacaatgaaggaatcaaccttcaataattctatgcggacttatctggtcaatcaggctaaatggacagcaacccgagagcattgtgcaaag…	MAMYLQGKYAPVNPKKYKGDIHKIVFRSSLELVAFKFCDTNPAIVYWSSEETVIPYISPVDGRPHRYFMDLKVWTRSPNSEELKITLIEIKPKDQIKEPKKTKTMKESTFNNSMRTYLVNQAKWTATREHCAKMGWSFIIWTEEHLVPGEDPDVKKQFALRSKMKREKEIQDRRREENIRALKEQMKKTIKSNEPKERDDGLLLP
2146	fig|6666666.475224.peg.73	peg	2146_51405_51208	51405	51208	-	hypothetical protein				atgatcgtgtctggttattcattggaactttattgcgattgtgctgactgcactcaatacagatcttcccaatacagcacgtcgtatcccaaaatatatgggggtgagacatatgctgaatgtgctaaagaagcccggaaggatggttggtatatcagtcgcgataaattaaaatgcatagctcccgggcatagctga	MIVSGYSLELYCDCADCTQYRSSQYSTSYPKIYGGETYAECAKEARKDGWYISRDKLKCIAPGHS
2146	fig|6666666.475224.peg.74	peg	2146_51815_51408	51815	51408	-	hypothetical membrane protein				atgcgttatgtagatcgtatgctcggccagaacgaacacgtgattggctttacccgcccgacctggtggagtggattttgggtctatttctgggtggttgtattcctcgttccgacttttggtatcagcctgtttttcctgattcccacgatcattcggaacctgacgactgaatttgccgtcaccaacaagcgcgttatcttcaaaacagggtttatccgtcgtgatgcagatgaactccgtttgggtaaagttgaaaccgtaaaggtcgaccagtccatcaccgggcgcgtcctgcggttttcaacgatcagcgttattggtactggcggcactcgtcttgttgccaagggctgtgccaagggtaatgatttccggcgcgtgatttacgaccaactg…	MRYVDRMLGQNEHVIGFTRPTWWSGFWVYFWVVVFLVPTFGISLFFLIPTIIRNLTTEFAVTNKRVIFKTGFIRRDADELRLGKVETVKVDQSITGRVLRFSTISVIGTGGTRLVAKGCAKGNDFRRVIYDQLDN
2146	fig|6666666.475224.peg.75	peg	2146_52332_51826	52332	51826	-	Cd allosteric enzyme				atgattaagccgcgcatgatgtttgctcatatgagagcagcccaggcatatggcaaggccagttatgcccgccgtcttcaggttggatgtgttatcgtagatcctcgagttgatcagccgttggctattggctggaatggcaccgcgcccggcgctcctaatgtgtgcgaaatagaagtagacggccagctggtatctgacggtgttattcacgccgaagaaaatgctctgaaccgtttacctcaacatgcggtagattggtgtggcctggttatgttcgtcactcacagtccttgccctgagtgcaccaaacgtattattgccagcggcaagatcgataaagtgatctactgtgaaccgtacaggatcaccactggtatcgtagaaatgatgaatgcc…	MIKPRMMFAHMRAAQAYGKASYARRLQVGCVIVDPRVDQPLAIGWNGTAPGAPNVCEIEVDGQLVSDGVIHAEENALNRLPQHAVDWCGLVMFVTHSPCPECTKRIIASGKIDKVIYCEPYRITTGIVEMMNAGIEVYRMVDQFAILKYSFNDKGELTTTPFCVNPDK
2146	fig|6666666.475224.peg.76	peg	2146_52669_52325	52669	52325	-	hypothetical protein				atgatgccgctaaaagagttgtatgaacgtgttttagaattgaaggccaaagaacgcctttattcagaagaagctgcggagttgtctgaccttacggacaaaatcgttctgcgtgagaaatatctgatgcgttatgtcaatcattatcctcatgctgataatgtcataaccaccgcgcttgagaaattcgcaggccgcgaagtcaatgatacactgaaagacgaaatgcggaccgtcatcagcaatatcgttcatagttgggttgcttccctggcggtttcatgtaagtttgatggtgaggatttgatcttcatgttctcaaaagaggtcaatgtccatgattaa	MMPLKELYERVLELKAKERLYSEEAAELSDLTDKIVLREKYLMRYVNHYPHADNVITTALEKFAGREVNDTLKDEMRTVISNIVHSWVASLAVSCKFDGEDLIFMFSKEVNVHD
2146	fig|6666666.475224.peg.77	peg	2146_53127_52732	53127	52732	-	hypothetical protein				atgaaagcgaaagatactgttgtgaaaactcaaaagtggcctcgctatacggctcatcaattgaattatatgctgggtatgcgtaattttgaggacggcgttcgcctcactcgtcatggccgtcatgaaaaacgctgtgtcaagtcctggaagaacgaaaagggtgtccgcgtttggaattttaccccgagccggcatctgaccaacgtcctgggtgatccttgggatacccaaaccggggagtctctgctcaagaaagggttgattgagccttggtttactgtaacccatgatggcggtcatgacgcccctgacggcaattaccgctatgctcgtgggaaagtgatccaattctatcgcctgactgcgctggggcgagaaatctgcctgaactaa	MKAKDTVVKTQKWPRYTAHQLNYMLGMRNFEDGVRLTRHGRHEKRCVKSWKNEKGVRVWNFTPSRHLTNVLGDPWDTQTGESLLKKGLIEPWFTVTHDGGHDAPDGNYRYARGKVIQFYRLTALGREICLN
2146	fig|6666666.475224.peg.78	peg	2146_53495_53124	53495	53124	-	hypothetical protein				atgataatcggtatcgattttgatgggacatgtgttacccatgaatatccccttatcggacgccatattggtgctgtagaggttctaaaaaagttggtggataaaaatcatcttctgattctgttcaccatgcgcagcgggaaacaacttgaagaagcggttgattggttccagtcatttgatatcccgctgtatggtatcaacaagaatccgacacagcatgaatggacagattcaccaaaagcatatgcgcaattgtatattgacgatgccgctcttggttgtcctctgagttatgacccaatgtctaagcgccccttcgtggattggggtgaagttgaaatcatccttgaaagagcgagaatattatga	MIIGIDFDGTCVTHEYPLIGRHIGAVEVLKKLVDKNHLLILFTMRSGKQLEEAVDWFQSFDIPLYGINKNPTQHEWTDSPKAYAQLYIDDAALGCPLSYDPMSKRPFVDWGEVEIILERARIL
2146	fig|6666666.475224.peg.79	peg	2146_53887_53492	53887	53492	-	hypothetical protein				atgacacaagaagcctttttgaaagtttatgtcggtaagggtgagactatcgcatatgattccaccactgattataagaaaactgaaaagatgataaaggatatcgtctttgtttgcgaccgctggggtgaccgctatcccaatagaaatattcgcagcgccgatctaatgaaattcatacctggcatccgaaatgatatcagttctggctgtgtatattgcttttcctcagatttggaaaaggccaaattaatcctggttgaatctatcaacgtgcgccttgtccgagtggttgattcatttatgaaacaaatggcttggcatgctgaatccgtaaaaaatgtatctggcgtcaaaacggttaaaataattcctgaatatgagacaaaatcatga	MTQEAFLKVYVGKGETIAYDSTTDYKKTEKMIKDIVFVCDRWGDRYPNRNIRSADLMKFIPGIRNDISSGCVYCFSSDLEKAKLILVESINVRLVRVVDSFMKQMAWHAESVKNVSGVKTVKIIPEYETKS
2146	fig|6666666.475224.peg.80	peg	2146_54456_53884	54456	53884	-	putative serine/threonine protein phosphatase				atggcgggtaaagttttctttttgggtgatccccacctgaaacataaaaagatccccaaatcacgtggatttgaaacagttgatgaacacgacatcgcagttatcgacagcatattccaaacgtgtggacgggatgattccttgatcattacgggcgacacatgcttcggtggcccggatgcttttatccaactgatgcgagaaggcgcggcgcgtaacctaccaaagatgcatggcaaggttcctgatgattggcggcccaacttcaacatcaaagtaactcaggggaaccacgacagcttttcaatgctgatgcagttattccttagtgaatggatcagcaagttttgctctctgtttgaatacaagatggctcggagtgacggcagcatctccaaa…	MAGKVFFLGDPHLKHKKIPKSRGFETVDEHDIAVIDSIFQTCGRDDSLIITGDTCFGGPDAFIQLMREGAARNLPKMHGKVPDDWRPNFNIKVTQGNHDSFSMLMQLFLSEWISKFCSLFEYKMARSDGSISKVIVTHVPVLLDRWEYNVHGHWHSRKVGNPDYLNSSWDHLRRPATFEELLQLHNGESL
2146	fig|6666666.475224.peg.81	peg	2146_55168_54500	55168	54500	-	putative uncharacterised protein				atggaaatcaatgtagaattcaatgacagagaatttgtacgcgacgtgttggaaggacaaaagttacccatgcatttcaatgataagagtgtgactttgttctggtctggcggtgttgacagtacatacatgctgttctggttgctttctcatggatattatgtccggacgatctactgcgacctggagaacaactcgttcaagtcccggcgcgaaatgtggtccaggaagaagatcagacagtggacagaaaactatcgtcctgagttgacgcaacgttgggacaatgaagaaactcccgtattaaagatcgaggcagctgctcctttccgggctgcattggcacaagccccgatatggttgcttggtactcagtttgcgtctatctaccctgagacg…	MEINVEFNDREFVRDVLEGQKLPMHFNDKSVTLFWSGGVDSTYMLFWLLSHGYYVRTIYCDLENNSFKSRREMWSRKKIRQWTENYRPELTQRWDNEETPVLKIEAAAPFRAALAQAPIWLLGTQFASIYPETYVIAYVNGDDALQYIRSFNKIMEGYAMLADPQKRPAELLFPMIGLKKAWFYEALRPLYGMMTWCEYPVLKKNCGCVPCTRHRYEVGHIN
2146	fig|6666666.475224.peg.82	peg	2146_55383_55171	55383	55171	-	hypothetical protein				atgagcatatcccgtaccagaactgtcacattcaatgttggtggtgtagaattataccattattatgcccgtgattctcacggcatgacgactaacacatatatggctgacggccatgtcgtgtcatacgaagaatttcataaaatcattaaggattctttgaaaggggccgaaggctatattgcgaaggcactcggaatgattagggtgtaa	MSISRTRTVTFNVGGVELYHYYARDSHGMTTNTYMADGHVVSYEEFHKIIKDSLKGAEGYIAKALGMIRV
2146	fig|6666666.475224.peg.83	peg	2146_55743_55447	55743	55447	-	hypothetical protein				atgtttgttttcactgctatcggtatgatatttgtgggatgcattgtgctcatcgcgatatatttgatctatagcaattatatccatccattgttccaggcaatcagcttaacccgctggcaaatcgcatgtgtgaaaccaactcggaaagtaactttcaaagacttctgggcatgtatatgtcattattatgaagttggtggctgggtagggactcgcacctggaacgatttgggcgaatggcgtggaataggccgatgggaagtttataaatctgataaagatgaagccccataa	MFVFTAIGMIFVGCIVLIAIYLIYSNYIHPLFQAISLTRWQIACVKPTRKVTFKDFWACICHYYEVGGWVGTRTWNDLGEWRGIGRWEVYKSDKDEAP
2146	fig|6666666.475224.peg.84	peg	2146_56372_55743	56372	55743	-	DexA exonuclease				atgtataaatcaaatattttggcggtcgccgatagtgaaaccctgggccgctgggatgatgctgttatgttatcctgggctcagacaatagctgatttgaccaaacgttatactctccagcaactagttgaagaacgtactacattcattaaattgaatgtcaaagagcaaatcgacctcggtcgtgtcaaagagaaagtgaccgtagactggtggctgggaaacgggaaatataatccatgtgatgccgcccgtgaagtcagcctgtatccaaaggaagacgatatctccatctatcagctggccgacgaaattcgcaaaggatgccatcgcctgggggttgatcccaggtcggttgactggtgtgatcgaaatctattcgacctgcgtaaagcccag…	MYKSNILAVADSETLGRWDDAVMLSWAQTIADLTKRYTLQQLVEERTTFIKLNVKEQIDLGRVKEKVTVDWWLGNGKYNPCDAAREVSLYPKEDDISIYQLADEIRKGCHRLGVDPRSVDWCDRNLFDLRKAQHIIEVTCGQYSNEPWDYHHTFDIVSWLKGVGQMDRYAGIKAWELEGMVYHDPRYDAALDWLRIQKTMEDLMGLKVE
2146	fig|6666666.475224.peg.85	peg	2146_56970_56365	56970	56365	-	conserved uncharacterised protein				atgacaacgtatatcgttcgtggtgggaatttgttggaagccgcgaaaagtttcaatcttattaacggattcgcccatggcgccaattgctggtcggtgatgggcgcgggtatcgccaatttcgttcggctgggatttcctgacgtctggcgcgcagaccagaacgatgagcgcgggccggagcagcgtctcggtggcatgtcttatgcctttgaccgtgacacgggtgtctggggcttcaacctgtatactcaattctatacaggcccaaatgctcgtatgccttccgttatcagttctgtacaagtgatgtttgaacaacttcatgagattatggaagcgaaggattctgaaacggtctatatcggcctgccagctatcggctgcggtattggcggt…	MTTYIVRGGNLLEAAKSFNLINGFAHGANCWSVMGAGIANFVRLGFPDVWRADQNDERGPEQRLGGMSYAFDRDTGVWGFNLYTQFYTGPNARMPSVISSVQVMFEQLHEIMEAKDSETVYIGLPAIGCGIGGLNLYDVVRQVEALAETLYEDTRRRVVPVFYIMEVDKFAEDMENLNALDDDINVVDSEEEIIRVEGNNV
2146	fig|6666666.475224.peg.86	peg	2146_57194_56967	57194	56967	-	hypothetical protein				atgcctgagttcgaaaaatattttgatccggcaaccacccctgcgtatctcaatcggatcgtaaaagaaatcgctttccgtttgatgtccaaagggtttggggttaatcttatcgccaccgacgagagaacatctatcatgtccatcaacaatagtgaaggacatggcggcgttttttgccttgaatttattgatgacatcaacattacctggagaagaattatatga	MPEFEKYFDPATTPAYLNRIVKEIAFRLMSKGFGVNLIATDERTSIMSINNSEGHGGVFCLEFIDDINITWRRII
2146	fig|6666666.475224.peg.87	peg	2146_57436_57194	57436	57194	-	putative uncharacterised protein				atgaccatggccaaatttgaacccggtgatatcgcgcaatttcgggctatttcacgtcgcttgaaattatatgaattaaacccagaagaaatcgatgaaaacgtgaagggaatgttagaagggatgtttggttgcgccgtcggtggtgaattattcgagttgttgaagatagcgtccgacaatgatttcatcgaatatatttctgaaaacgcaatggaaagcgtgatgaaggggaattggtga	MTMAKFEPGDIAQFRAISRRLKLYELNPEEIDENVKGMLEGMFGCAVGGELFELLKIASDNDFIEYISENAMESVMKGNW
2146	fig|6666666.475224.peg.88	peg	2146_57884_57480	57884	57480	-	Arn.3 conserved hypothetical protein				atgaaactacttggttatttccgtgaactccctggtggcactggacgattgttctctgaggtcaaaggaaccccggatgatacaatggttgccctgtacgctcgtggcctacccaaggaaggggaatggcagcgccgtgtcgtggccgcagccaacaaatatggtgacgtgatcgtggttgctgatcgtcaccacagcctattgatgaattcccagttaagaattctaaaagaagctggggtcattaccacaacccatacccgtgaacagggtttcatcgacaaccaaggcaatttcttaactcgcgaagaggcagcgatcgtcgctaaagaagccgggcaagtcaaccaagttcgtctgaagaatactcctttcaaacagcttttctccgaagacctt…	MKLLGYFRELPGGTGRLFSEVKGTPDDTMVALYARGLPKEGEWQRRVVAAANKYGDVIVVADRHHSLLMNSQLRILKEAGVITTTHTREQGFIDNQGNFLTREEAAIVAKEAGQVNQVRLKNTPFKQLFSEDLY
2146	fig|6666666.475224.peg.89	peg	2146_58202_57888	58202	57888	-	hypothetical protein				atgagcagattcctgagttcaaaattattgtctatgggtgattctttatattttcaatgtcctggttgtaatatgcttcacccatatcgcgtgaagggttctccagaacaaggcccgatctgggcgtggaacaatgatgttgttgcacccacttttactccaagtctattggtgtttaaagatcgcccaggctcacgctgtcatttgttcttgacaaatggcaaaatacaatttcttggcgactgttttcacgatctgaaaaaccagactgtggatatggtcgatattcctgaacctgaaatatggattgaatag	MSRFLSSKLLSMGDSLYFQCPGCNMLHPYRVKGSPEQGPIWAWNNDVVAPTFTPSLLVFKDRPGSRCHLFLTNGKIQFLGDCFHDLKNQTVDMVDIPEPEIWIE
2146	fig|6666666.475224.peg.90	peg	2146_58492_58202	58492	58202	-	putative uncharacterised protein				atgttctatttccgcagcatttccgttcttgtattccttgcctgggtgcttgacatatgcatccctcgcttcatatcagaagaagtcgcattcgcccttgtagaagaaggggaaggggaagacttcgatgcctatgtccccatatgttctttgaaagatatcactgacgaagacgatgatgttgtcatggtaggcactatgcgttccttcaatctgttcggcttcgccttgtggcctaaactgatcggggaattgcgtccttacaacccatatgaggagatggacagctga	MFYFRSISVLVFLAWVLDICIPRFISEEVAFALVEEGEGEDFDAYVPICSLKDITDEDDDVVMVGTMRSFNLFGFALWPKLIGELRPYNPYEEMDS
2146	fig|6666666.475224.peg.91	peg	2146_59866_58535	59866	58535	-	DNA topoisomerase, phage-associated			icw(1);Phage_replication	atggttgccaagagcattactgtgacatcatttgtcaacactgaccataaggagttttcggtcgttaacagtgttcgccaaattcctctgttaattgacagcctcaagcccagccagcgaaaaattttgtttgctgcgttggaatacggtaaggaagagattgttgatcgcctgggtatgttcgccgccgcccgtaccaattacaaatctggtggtgagaacatgagcaacactatcgtcaatatggcacaggctttcccagggacgaacaatatcccgtattttgatcgtgatggtcaattcggatcagtcatgggtaaagaagcgtcatcaccgcgatatatttctgtggcagtatccggcgtgattcgtaaaatctatcgaaaagaagatgaaggc…	MVAKSITVTSFVNTDHKEFSVVNSVRQIPLLIDSLKPSQRKILFAALEYGKEEIVDRLGMFAAARTNYKSGGENMSNTIVNMAQAFPGTNNIPYFDRDGQFGSVMGKEASSPRYISVAVSGVIRKIYRKEDEGILEYNYLGEERLEPKFFLPVIPMFLVNGLNGIGSGYATKTPCHSIKSVLDALRALLRGEDPNDLKPYWNGYKGETGYTEEGRVYCRGVYERLNATTLRITEVPVGWFAKDYETKIILPLYKSGILTEYSNDSTEDGWDITVVFKRGELSKLDDAKVEQMFRLYSAEMPTWTSWNECGIIQRFNGWKDMLYAFFNYRLERYEDRRQYLLADLNSRIHKMNNRAVFIEWATKIDLRQKIDVLKSLFIQDYPDFDGDLDDLFKMSLSSI…
2146	fig|6666666.475224.peg.92	peg	2146_61778_59868	61778	59868	-	DNA topoisomerase, phage-associated			icw(1);Phage_replication	atgaccagtaacgttaacattgaaagaaagtacaagaagctctcccatgtagagcatatccttcttcgcccagaacgccatctgggcagtatccgttcgacatccgggactgtttgggtttatgacccggtaaaagatcaggttgtattcaaagacaactttacctattccccggcgctgatcaaacagttcgatgagattatcacgaactgcgttgaccatagcaaaactcctgaggggaaacgcctcaacgagatcactgttacggtaatggcgatgaacggccagatcatcgttgctgacaacggcggcatccctgtggtaaaacacggtgagaccaaagaatggctcccggagatgctcttcggctccctgtatgctggtagtaacttcaacgat…	MTSNVNIERKYKKLSHVEHILLRPERHLGSIRSTSGTVWVYDPVKDQVVFKDNFTYSPALIKQFDEIITNCVDHSKTPEGKRLNEITVTVMAMNGQIIVADNGGIPVVKHGETKEWLPEMLFGSLYAGSNFNDDDEEYNNKKSGGQNGEGASLVNVFSKWFRVSTNDGKKSYLQTFENNMSKRSEPTISNLNAPGTTIAWIPDYERLGIKGLDNNNLLMIYRRAFEVAACNPRLKIVLNGKPIRIDRFGHFVDYFCQGSSVDESGDWSVAIAPSNGTFMHASYVNSIATHVGGPHVDYVADQIVAAIRTPLSKKFKTELKPAMIKNHMMLFISADIDNPRFDSQTKERMTTPVSQFGTTYKPSDRLVRKALEYVTIGLGKELAALRNDQDDAEFEKAKK…
2146	fig|6666666.475224.peg.93	peg	2146_62405_61827	62405	61827	-	putative uncharacterised protein				atgaaatttctgcgtaatattttaaacacatcgtatgattgcactacgatgaatccctctcgttcttcagtatttgtattcagtaaacttgtagaagaaacgtgtgaattatcagacgtgttctatggtatcgccgcgtctgagcctttgaatggcgaagtagcagacgtcatcatatcagcgctggatttgctgtatgtgactgaatatcaacacgtccagcaatatggttccatgtccaaggacgaaatatttgattctatcatctatgcattggcccaggctaatcacacaagtgatttgtctgagcacacgttagaagattattggttttgcgggggtgttgatcccgttgataaacaactggcgatgattaaccatttcaaaggaaggatcact…	MKFLRNILNTSYDCTTMNPSRSSVFVFSKLVEETCELSDVFYGIAASEPLNGEVADVIISALDLLYVTEYQHVQQYGSMSKDEIFDSIIYALAQANHTSDLSEHTLEDYWFCGGVDPVDKQLAMINHFKGRITRLLNQPQRSNDRMVDLINSIIKHTSKFACDCNQNHVSTIVKVEHAIEHKVEKWRGKFGL
2146	fig|6666666.475224.peg.94	peg	2146_62887_62402	62887	62402	-	hypothetical protein				atgttcctattactcaatgttccaaaagatcgtatgacgccggatgatgaaggcaagacacattacaacatttacagtcggagccgcaccgagctggggagattcctgtctcattttgcataccatcccatggatactgtcgatggtgttttcaactcgatggaaggttactggtattggctcaaatatcggcacgatgacctgcgtagcctttatggaaatgatgccaaacaattcggtcagactctggccaagtcgcagattgtcgttctgtctcctgatgaccccaaatttaaacacgacatcattgcagcaacaagccaaaaattgctgacgatgccacccaagctgcgtttccaattagcccacagccgccttcccctgatacatgcatatgaa…	MFLLLNVPKDRMTPDDEGKTHYNIYSRSRTELGRFLSHFAYHPMDTVDGVFNSMEGYWYWLKYRHDDLRSLYGNDAKQFGQTLAKSQIVVLSPDDPKFKHDIIAATSQKLLTMPPKLRFQLAHSRLPLIHAYEHQGKYSFQNSMDFIIQHINRFRLEGYLK
2146	fig|6666666.475224.peg.95	peg	2146_63122_62931	63122	62931	-	hypothetical protein				atggtacgtttacgtcataaaccgaatcagttcgccctgggaatgatttgtggtatatcattcatgatatgcctagaaaacgcagttagtcttgttgcggcccctgacttccctttggtcagatttatattatctgggctgtttggtgctgtatctgtcgtcagtttcttgatcgcatccaggaaattataa	MVRLRHKPNQFALGMICGISFMICLENAVSLVAAPDFPLVRFILSGLFGAVSVVSFLIASRKL
2146	fig|6666666.475224.peg.96	peg	2146_63511_63290	63511	63290	-	putative uncharacterised protein				atgaagaccttcaaggatttccttgaagattcttctcctcctgcaaccacgaccgctgatgtggggaaacccgaaggcggtatggtcaaggaacccgtgaagaaaccgaaggatcttgaagaggaatcagagttcaagaaactcttcggtaatatcttcaaggatattgacttcagcaaagccaagaaatggaatttcaggacaggcaaatatgatgaataa	MKTFKDFLEDSSPPATTTADVGKPEGGMVKEPVKKPKDLEEESEFKKLFGNIFKDIDFSKAKKWNFRTGKYDE
2146	fig|6666666.475224.peg.97	peg	2146_64322_63513	64322	63513	-	Phage tail fiber				atgccaacaatcaatgtattagtcgcgccgtatgttgtacgcaacaaaccggagaccgaacgtggtcatgttgttaccggggttgccaagggctggcagaaaaccagtctgaaccaagacccgaacgaaattctgaccgaatgtaaaggtcttgatgcactgctgaccaaatctaatctggaagcagacggcgtgaccaaaatcgatccttcgaagcccgtcggcttcctggtatcttacgaaattcatgatcccagcgcagtcctgactactggtctgactatcaccccggcaaccgccaatggtgaaattggacaggtggttgaacttctggcgacggtggccccggcgaatgcgacctataaaggcgtcaactggtattccggtgacgtgactaaa…	MPTINVLVAPYVVRNKPETERGHVVTGVAKGWQKTSLNQDPNEILTECKGLDALLTKSNLEADGVTKIDPSKPVGFLVSYEIHDPSAVLTTGLTITPATANGEIGQVVELLATVAPANATYKGVNWYSGDVTKAVHIGGGKFKLLQSGSVTVYGVTVEGNHVDSTVITVAGALSLSTDLTATKDVTSGEDATFSVVAAGGTTPYTYAWYFSDVPGGAGSVIDAGTNATASTANLVVTAVDAADEGEYWCVVSDADGHSVTSTRCEMAVV
2146	fig|6666666.475224.peg.98	peg	2146_64480_64301	64480	64301	-	hypothetical protein				atgttggtgttgaaaactgacaagtcccaacatcctcgtctgaaagcagcgttgttgacgttaggtgtatggagagatgatttatgttccggttcttatgaaccagataacgagctgatgatggctctgaacaacgatttggatgagtggaggaaaccatgccaacaatcaatgtattag	MLVLKTDKSQHPRLKAALLTLGVWRDDLCSGSYEPDNELMMALNNDLDEWRKPCQQSMY
2146	fig|6666666.475224.peg.99	peg	2146_65135_64725	65135	64725	-	putative uncharacterised protein				atggccaagacaccgaaagttaaagatactgctgttgttgacccaatcaccgcagtagaagaacagaaaatcccatcatacctgcagcgcgtcctggataacatcccgaacgttggcgacggcgccacggtatatgctggcgactacggttgggtgtgcgagcataaaaacggcgataaggagcttctggaggagctaaccgggcttgccagtaccctcaaacgttatggtcgcgacaaattcggccgaccgatagaaccgggcacggtcatcagcactgatattacagtagaaaccctcaatctcctggatatcaatgatctgtcggtattgggtgagcctctggggattgtagaaacagaccgggacaaattgatcgaaaaattgatcgaaaaactt…	MAKTPKVKDTAVVDPITAVEEQKIPSYLQRVLDNIPNVGDGATVYAGDYGWVCEHKNGDKELLEELTGLASTLKRYGRDKFGRPIEPGTVISTDITVETLNLLDINDLSVLGEPLGIVETDRDKLIEKLIEKLQIK
2146	fig|6666666.475224.peg.100	peg	2146_65409_65113	65409	65113	-	hypothetical protein				atggaaaccagagatgtttatttcaaatatgctcgccagacatttgggccttatagaacgactgaaaaattcttaattgattcttttcaatttgacggtgaaatgcgagaatattcatacaaacatttcccggtcaggaatattgaaggggaccaattcgtaaaattattctgtcgttgtggggcatgtgactttaatgacgatgggcgttgtatgcatgaataccaatgcaattgctgtggtaaatatatcaaagtctataggagaactgaacatggccaagacaccgaaagttaa	METRDVYFKYARQTFGPYRTTEKFLIDSFQFDGEMREYSYKHFPVRNIEGDQFVKLFCRCGACDFNDDGRCMHEYQCNCCGKYIKVYRRTEHGQDTES
2146	fig|6666666.475224.peg.101	peg	2146_67048_65462	67048	65462	-	RIIB Protector from prophage-induced early lysis				atgactgctaccgaaaaaagtattttgcggatgttgaaggatggcaaaagccagaattctatcgctaacgaattgggcgttcctcgctcaatggtacagcgtgtgtccgaccaggagctgggcgttgacccggcttctctgaaatcgctgacaaccgaacagatcgaactgatccagtctcagagccaggccggggaaagcaacaccaccctggcatcagcttatggcgtcagccccaaaactatcgcccgtgcgctgatggtccgtatcatcaaacaagcaaacaacatcaccgtcatttcaccgattaaagcatcggacgccacggaagaattcgaagtcctggaaggcggcgtggctgtatatgaaaaagacgacgaagagtggtatgtcggaaag…	MTATEKSILRMLKDGKSQNSIANELGVPRSMVQRVSDQELGVDPASLKSLTTEQIELIQSQSQAGESNTTLASAYGVSPKTIARALMVRIIKQANNITVISPIKASDATEEFEVLEGGVAVYEKDDEEWYVGKFMENHNQFLCLRYTDDSSYAGIKAAMIPRDQLKPSESSDKFNSKNDGDKIVALAEVASALVDGYKGESSEITVILPDEDTYPMRGSMDARRRVGYYDCILGRTLRLALSSVTFKVKLKETQQIGDKQTKAEFGDKELSVFLNEHQIMILPESVVIVIDGKPETITTSHQSYDRIVEAIKSRDIKLAYTLMKPREAIKKFATGLVDISNNRVRWSGHDITGTSVAKRILTLMLRGDYSNMQRLTNFLDKMFQNPSSSLVQSGRIYEF…
2146	fig|6666666.475224.peg.102	peg	2146_69838_67082	69838	67082	-	RIIA protein				atgaaaatgcgcaagtcagagcactttgtccgctcttcatcatctatatctggtaatgtgttcaacgtcaaaatgaccgataagttatttgaaacgttgttctccagcctttatcgttataaagaagcggcggcgcttcgtgagaccgtttgtaatgcgattgacgctcacaacatgcgtaaccgtttacagcgctggatgccgtctcattatgcctctctgtccccgatgccccaactacacagtaagtatctggcgccttctaacattcccgtagaagtccatctcccggacgattacgagccatggctggaaatcaaagactggggtatcggcctttcgctggaacagatcatgggtgaacctattttggcccgtgaagatgaagtgcttctggcg…	MKMRKSEHFVRSSSSISGNVFNVKMTDKLFETLFSSLYRYKEAAALRETVCNAIDAHNMRNRLQRWMPSHYASLSPMPQLHSKYLAPSNIPVEVHLPDDYEPWLEIKDWGIGLSLEQIMGEPILAREDEVLLAGNMVVKEDEIPEGSEVLGVPDFSSYYGGQLVFKTQDGEIIRSPGLYTTLFNSTKEDDDGQIGAFGLGSKSPFSVSDSFTVESRYEGKIYRFLMYLNGNRIPTVDLVTKNVETREPAPEDTDEWNGLSVKVPVKNSRFRAFEEELIRLGKVMKSNERPKVTNHSYNFDWEDISFNNRVGNTYLQPKGTGNTHYAVMGGVSYPIDLEQLEQDVSSILEKFPTSYTFFELGELNVPPSREDLSYDEYTRETLNRQFKKVANKIMQEKIS…
2146	fig|6666666.475224.peg.103	peg	2146_70279_69938	70279	69938	-	putative uncharacterised protein				atgagttctattgaacagctgatcacgccgcagtacatttattctaacattgttgagcatctgcgctcacaattgaatatcggtacgttgaacagcagtgaattgtctgacttcaaaattaatgaagtcgagatcgccgccttcgggagccgctaccattttgagatcaagcgcactgttatagagcaggtgacttccagccttctggatctgagtgcaaccaagcccaatcgtgccgagccgactgtagttgtcaaacaatacgtcggttatctggaagaagtgctggaaccgggggcgacgcgcccgacctttgacttccgagcatcactcattggataa	MSSIEQLITPQYIYSNIVEHLRSQLNIGTLNSSELSDFKINEVEIAAFGSRYHFEIKRTVIEQVTSSLLDLSATKPNRAEPTVVVKQYVGYLEEVLEPGATRPTFDFRASLIG
2146	fig|6666666.475224.peg.104	peg	2146_70457_70290	70457	70290	-	hypothetical protein				atgagtgatgacaccttaacagaagaacggctcctagaaatatctgaaggggagccgaggaaggtgaagtgtcatgtcatgtttggtgaagggaaacagatggccgacgaaattctgtatcttcgagccgaactcgctcgattaagtaaacccgaacccgaaatttag	MSDDTLTEERLLEISEGEPRKVKCHVMFGEGKQMADEILYLRAELARLSKPEPEI
2146	fig|6666666.475224.peg.105	peg	2146_70672_70454	70672	70454	-	hypothetical protein				atgggttccaaaaaggcattagttgccattgctatggctggtgctgttatcagtgcagaacaagcattggcgcgtagttatcaggaatcacgtcatcgcggtgatgatatttggtattccaacaattcagggccgggaacgccaggccatggtcgaccatcggtgaaacgaccgaagaaagccaaaacgcatggaaagaacaaaaggaagagtaaatga	MGSKKALVAIAMAGAVISAEQALARSYQESRHRGDDIWYSNNSGPGTPGHGRPSVKRPKKAKTHGKNKRKSK
2146	fig|6666666.475224.peg.106	peg	2146_71325_70672	71325	70672	-	putative uncharacterised protein				atgaactcgcagaccaaaccgacttaccagcagcttgttgatactgtaaaggcgtacgacaagttcatcaaatctatgatttgtggcatccaattttctaaagagcaatcagataaaataatggaattattgaaccctctttggggtgttgacaacatcgttgcccaatgtaatgaaatgagccaatctgatgaaccaacttatgaggcgttggtacaatcgctcctggcactggatgatggttgttctgatttgttcggtcaatgttgttcaaatccagtgaagaacgcttggggccaaaatgtcgacttcaccgccttgaacaaagggcgagaagttgccagcaccacgatctataaactcagaagttccatgaaaacgtctgagtctaaaatacca…	MNSQTKPTYQQLVDTVKAYDKFIKSMICGIQFSKEQSDKIMELLNPLWGVDNIVAQCNEMSQSDEPTYEALVQSLLALDDGCSDLFGQCCSNPVKNAWGQNVDFTALNKGREVASTTIYKLRSSMKTSESKIPEVKQTNPPKSGIQEYLENFDEYSFTDLMLRDLIDQEERRQSKNRPEVQSRDEIRALVERDFDYGSMQLAVMIVKALSYAAKGEL
2146	fig|6666666.475224.peg.107	peg	2146_71708_71322	71708	71322	-	hypothetical protein				atgtcagaacccaaaaagatcgtgatcatcgggggcggtcaccacagtattatcatgaaggccgcattacaagatcttcatccagaatgggaaataaagcagatttcgatcgaagatcatatgtcagctcgtgaactggcacgtcttgaagagaacgacaagcgcatcgtgattctggatgaaatctgttctgaatttgatgtgaagcagcttatcaacagcctgaaatcaaggcgcaaattagatgacaatgattttattgaaacatccagagacgagcgtcagatgatgaaagatgctcgttatcaaaagcctccccgcctgcgcggggcagcacaaaataaacgtttggccagtaaggcacgcaacaaaggaaaaagaaaatga	MSEPKKIVIIGGGHHSIIMKAALQDLHPEWEIKQISIEDHMSARELARLEENDKRIVILDEICSEFDVKQLINSLKSRRKLDDNDFIETSRDERQMMKDARYQKPPRLRGAAQNKRLASKARNKGKRK
2146	fig|6666666.475224.peg.108	peg	2146_72193_71774	72193	71774	-	putative uncharacterised protein				atgagcgtaaaacttaccgaatctatgagtcttcaccaacaacaggcgattctggacgagatcgttatctcagctgttaaacaaggtatcatcagggatgataccctattaacccggcctgagatgatccaccatcttgccgtatgcctgggggaagcatcctatcctcgcaaaaagatcgtgttgtttaaagaaggtattatccatccgtctggacgctgcgctttccttactctggttgaagcgcatccggtggctgagaagaatgaaatcaaaacttctattccggtgacgccgtacaccaaagacgttaacgaactgacgtggttcgaaactatcaacaccatctatatcatggcagttggcggccagcctattcaggatctgcgcggcgatttg…	MSVKLTESMSLHQQQAILDEIVISAVKQGIIRDDTLLTRPEMIHHLAVCLGEASYPRKKIVLFKEGIIHPSGRCAFLTLVEAHPVAEKNEIKTSIPVTPYTKDVNELTWFETINTIYIMAVGGQPIQDLRGDLNYTQAE
2146	fig|6666666.475224.peg.109	peg	2146_72761_72198	72761	72198	-	hypothetical protein				atgtcaaaaagtatcaattcttctcttatcgtcgtcggtgctaccgttggtttgatcgcaatcatcgccgggtttcttatcagcacgttcaacggcttcaacacgctggagaacaatgttaagaagttcaacaaggactcggagaactatctgagttcttataccctgaaagtgcaggaaacggcgcaaatcccggacatgtacaagaacgggttgaaggaagtcatcaaggggacatttgaaggccgctatggcgctgatggttccaaagcggtgatgcaatggatccaggaacagaacatccagtttgattcgtccctgtacaaagaaattcagatcgtaatcagcgcgggccgcgatgaattccgtatcagccagaccaaaaaactcgatgcgtgc…	MSKSINSSLIVVGATVGLIAIIAGFLISTFNGFNTLENNVKKFNKDSENYLSSYTLKVQETAQIPDMYKNGLKEVIKGTFEGRYGADGSKAVMQWIQEQNIQFDSSLYKEIQIVISAGRDEFRISQTKKLDACQLYETRLQQFPGNIVAGMFGFPRLDLEKTCQVVSDSRTQAAFESGVQAPINFKG
2146	fig|6666666.475224.peg.110	peg	2146_73869_72778	73869	72778	-	conserved uncharacterised protein				atgatctatctctttttcatcctgccattggcgatggcggttgcgttcattgtcaggcaccaggccgaccacaacgttaaggagacggtctatacgacccttatcggggttggtttgtcttgcctgatacaagcgggtgcatacgcagcattctccttggggagtgctgctgacgtggaaatccttaacggttatgttacgggtaagactcgggaaaaggtctcgtgtgagcaccagtatcaatgtggtcagacatgttcaacggatagtaaaggcaaccagtcctgtgtcccgatctattgtgacgagcatgattacgacgtcgactgggatgttcacacgaccgtcggtgatctgaccattaagcgtatagaccgacaaggtttgcgtcagccgccg…	MIYLFFILPLAMAVAFIVRHQADHNVKETVYTTLIGVGLSCLIQAGAYAAFSLGSAADVEILNGYVTGKTREKVSCEHQYQCGQTCSTDSKGNQSCVPIYCDEHDYDVDWDVHTTVGDLTIKRIDRQGLRQPPRWAQVKVGEPAAQDHPYQNYVLGNRDSLFSRSDEQFAQKFKDYIPAYPKVYDYYRVNRVLNMSGLNLPVGYWNDYLNGVLKTLGAERQVNIVWVITSGQPIEYFQGLVYAWAGGKKNDVIVVTDITKDMKINWGKSTSFADGMNNMELHSRNGLSLTGQPMGIAVFQEVATNISKGYNRVSMKEMDYLKWRELKTWEALIVSLLGCVPFGVLFYLGAGPYNFSLNRRFPF
2146	fig|6666666.475224.peg.111	peg	2146_74255_73866	74255	73866	-	hypothetical protein				atgactcgcatcgaatacgctgaatacctgtacgatctgttcatgaaagaaactgaaggccagttacacccggcgaaagcccgttttaaagaattgcatgacaaaggtgaattaccactaccgttcattatccgcgaattgcgcctcatgggggttgaatatacagaatatcccatcacgtgcccaagaacgttacagcgggctacggcgcacgttctccattcagtggcaaccatcatgttccgttatcatctgtcgtttgatgaagccatggacccgaagtaccatgaagaacgttgggcgctcttggttgccaacggcgcggatgaaaaacacaaagaacaactgttgggtatgaccaaggcccaactcgtgggtggtgtattatga	MTRIEYAEYLYDLFMKETEGQLHPAKARFKELHDKGELPLPFIIRELRLMGVEYTEYPITCPRTLQRATAHVLHSVATIMFRYHLSFDEAMDPKYHEERWALLVANGADEKHKEQLLGMTKAQLVGGVL
2146	fig|6666666.475224.peg.112	peg	2146_75551_74334	75551	74334	-	hypothetical protein				atggcacatttatctaaaatgccgcaggggtataaagcccctgagcaatggaagtacccgattgatctgaaggttgactaccgcaagcctgagaaccggatgtatctgctcaaggcgtgggtagaagcactgtcctatactgaagagcacaaccagcagatgcgtctgatggattatgctattgaagtcacggaaggcctcaccaacctggaaaagatcgagcgcaagatctggatggcgttcctttggggttgctgctataatgcgatcggcccgtggacaatctactctgagttcccggttcctccgcagaccaaagaagaaatgcagcgcttctcggactggtataatctgaactttgaacgcatgcgcttcgatactgattgccgctaccgcaag…	MAHLSKMPQGYKAPEQWKYPIDLKVDYRKPENRMYLLKAWVEALSYTEEHNQQMRLMDYAIEVTEGLTNLEKIERKIWMAFLWGCCYNAIGPWTIYSEFPVPPQTKEEMQRFSDWYNLNFERMRFDTDCRYRKSKMIPCVQSYVDWLGGKTQMDSFRWMLECTMKEDQFTELWDTAMSWKYFGRLSAWNFLEALNMVFGNMWEIDVPGFMLRDREGSESNRNGAAFLSNRDDWVTKHGKKKIDGCPITDEECDILEADLEKAFHECVEEFGHLTFINRLNFETSGACWLKKFFRLKNTRYIGWDAERTWDEIDYMERIWPEYSCKALWEARSLWLPDTLLCEKAPAGHVPGVQKWKMPVFFETGVPLHIWHLQKGTRWEPEERIERKQEAAPVGKSVNL…
2146	fig|6666666.475224.peg.113	peg	2146_75935_75555	75935	75555	-	putative uncharacterised protein				atgaaaattttgattccccgcgatgctgtggctatcgctattgattataagggcgatgccaagatgatcaatgctgtccgttattacccggaagacaaccgggtaatcccacagtttcagctgaacactaacccggcgtctaaagatttcggtcagtggcgccaggtcggtctcgtccgtactaacgccaacgcccaggcgttcattgctgaccgttccaataaagccaagcgcatgtgggttgttacttctgacaaacgctttgtcgatatctggaactctgcattcggcccggtcaccgcagatcaagtgcaactggagccagttcagcctcatcctggagatgaagaactttcaagttccgtcggcgaaaaggattga	MKILIPRDAVAIAIDYKGDAKMINAVRYYPEDNRVIPQFQLNTNPASKDFGQWRQVGLVRTNANAQAFIADRSNKAKRMWVVTSDKRFVDIWNSAFGPVTADQVQLEPVQPHPGDEELSSSVGEKD
2146	fig|6666666.475224.peg.114	peg	2146_76135_75932	76135	75932	-	hypothetical protein				atgaacagcaagtggttggatgctattttattggtcggggcgatcacttgtttagcctcattattaaccatgatagtgtatcattatggtttcattgatctgtcagaagcagaaaagaaaaccatgaatgtggtttactggttcggcttcttatcgttctttatacctgttgtctataaattatttttaaaggaaatgaaatga	MNSKWLDAILLVGAITCLASLLTMIVYHYGFIDLSEAEKKTMNVVYWFGFLSFFIPVVYKLFLKEMK
2146	fig|6666666.475224.peg.115	peg	2146_77022_76138	77022	76138	-	putative uncharacterised protein				atgtcaaaactgattgtaatcaaaggcacaagcggcacgggcaagggtactcgtgtcgtacagttcatagaatggctgcgtactcgcctagagccgcgcgaggtcacttataccatcggcgataaaacgcgcctgtttggcctggcctttgatgaactgaaattaatgtttgtcggccagtatactgcgtcaaacaaatctggtcttgcctcgtggacctcgatggacgctatccatgccgcgacaggttctggtgatatcgcccgcgaactggtcaaagaacatctcagcgcgggatatacgctggtctgtgagggtgaaccgctgatgctgtctgataaatggcgtccagaatggatgtttgccaattatcctattgagcaactggcgctgttgtac…	MSKLIVIKGTSGTGKGTRVVQFIEWLRTRLEPREVTYTIGDKTRLFGLAFDELKLMFVGQYTASNKSGLASWTSMDAIHAATGSGDIARELVKEHLSAGYTLVCEGEPLMLSDKWRPEWMFANYPIEQLALLYFTYPDRYQYDARIRGRSGKEAGDSGWTRNESYQKEFEKSKSEMLAAGWEVVVDSYSGQDVLYKKNGVGSEVAQLPFDAPLWVIGNAIHHMIINEVRDAGFVFKEFYKYCEDHPMTREVGGSDPLAHRVPEKATRRQVVKKTADEKKQLSKSSNVLAMMLRK
2146	fig|6666666.475224.peg.116	peg	2146_77330_77022	77330	77022	-	putative uncharacterised protein				gtgtctaacgaattgctgaaagtggtagaatgccctgacaaacgatcaggggatagtgatatggatggcgtcatcattcatatcaacaactacatccgttctcaagagaatccttcctctgttggggcggctaaagaactgaagcgtgtcttgagtgagattgggatgtctcctgatgacgaagaaatattctataactttgacgaccagtataaagtaaagtttgaagaaaacggtattccgcaggtggctgtcttttgggcaccgtggattggcggcgtgagctggcgtattgaggatgacaaataa	MSNELLKVVECPDKRSGDSDMDGVIIHINNYIRSQENPSSVGAAKELKRVLSEIGMSPDDEEIFYNFDDQYKVKFEENGIPQVAVFWAPWIGGVSWRIEDDK
2146	fig|6666666.475224.peg.117	peg	2146_78123_77332	78123	77332	-	hypothetical protein				atgaacaacctgacttgcctatacgatatgaactcaaaggtcggaggcctgtaccgggttttggtggacgttgatctgacaatggtcgatagtctatcgccttgggtcaaatggtttaatgacggaaacctggaagcccaagcaagtctcccggatgggattgttggccctgctaaattccagccgatcaccaagcaatgttatatgaaccatgcgggtgatttggcaatcctgatgcgtgaacgtgctcatccggcatggtctcattcatatgtcagtatcggcggtaagacccattatatgtcaaacggacgcgacccgatggacttttggcgccaacctgatctgtactcccgtatgcagccgttgcccggtgcggtagagttcttgaacaacttg…	MNNLTCLYDMNSKVGGLYRVLVDVDLTMVDSLSPWVKWFNDGNLEAQASLPDGIVGPAKFQPITKQCYMNHAGDLAILMRERAHPAWSHSYVSIGGKTHYMSNGRDPMDFWRQPDLYSRMQPLPGAVEFLNNLHDALLMKFEMVEFVAVTKCEPEHERSKRQFVYGKFPNIFNGFISTDEKHMVAGDVLIDDNPKYVDPCIWNNVFSIFVPQGNYEKLDLSDSENMIYVKPVEGRNHFDYLRENFTEVVDRLVAHYQFVRQGV
2146	fig|6666666.475224.peg.118	peg	2146_78470_78120	78470	78120	-	hypothetical protein				atgaaactcaataaaaacgttctgttctacaaaatcatgctggcattcactctgtcagtatctctgtctgcttgctctgctctcttggacacgccagatctcagcgggccggacttcactcaagaccaggctcagaccaaaatggatgacatggttaaagcacatgccgccctccagggtactactcccggcccgatccagaccgtttgtaattacgatgacagcgatccaacaacggagctgtaccattgttccactttcgtaaaagactccatggttgtcctgtatggcgactgccaggctgatggttgtaaagcgacaggatatgataaagtggaggaagataaatga	MKLNKNVLFYKIMLAFTLSVSLSACSALLDTPDLSGPDFTQDQAQTKMDDMVKAHAALQGTTPGPIQTVCNYDDSDPTTELYHCSTFVKDSMVVLYGDCQADGCKATGYDKVEEDK
2146	fig|6666666.475224.peg.119	peg	2146_81534_78538	81534	78538	-	DNA polymerase (EC 2.7.7.7), phage-associated			isu;Phage_replication	atgactgttttctatactaacgtcgcccggcaaggcaacgacctgttagttcgaattgcagatgacatgggcaaccgccgcatgctcaaaaagaaattcgaacccactctatatttacccacggctgattattctaatgttgaaaaagtcggcctgttgaacgaacctctgatttctaaaaagtttgcgtctatgcgtgacgccgacaactatatggaggaatacaaggatgtagaaggcgcggcgatatatggtcagaccgactatgcctatcaattcatcgcccacagttttcctggtacaattcagccagattacaacaacatccatattgccaaccttgatatcgaagtgttctctgcaggatgggtcgatgggcagatgactaaaggtccattc…	MTVFYTNVARQGNDLLVRIADDMGNRRMLKKKFEPTLYLPTADYSNVEKVGLLNEPLISKKFASMRDADNYMEEYKDVEGAAIYGQTDYAYQFIAHSFPGTIQPDYNNIHIANLDIEVFSAGWVDGQMTKGPFPHPTIELQTFKGSAARVRQFHKRILANHAFVREHFPGSFISNNVTDQFPIIDANGKITQNMNAAFPITLIQLQDLTNNKYMVWGMPCSKDRHKFKYDPNDEEIGGLEVEYQEFTTEQDLLRSFVDYWEARAFDCWTGWNIEQFDSPYLVERCMQVLGEADTNRLSPWGKIKKRIIRDKKGDITTYQFVGCPMLDYLQVYKKHTYTTRERYSLDWIAYCELGEKKMDYSESKSLFDLYFNDYCKHTRYGIKDVKLVWRLEQKLRLIQ…
2146	fig|6666666.475224.peg.120	peg	2146_81613_82185	81613	82185	+	putative uncharacterised protein				atggcaatccccttggtaagcatgattcctggtgctttgaaacagctctggaatctgggaactgatttgattcaatataagcgggaaattgtaagcgccaaacacgatgtcaagttagaagcgatcaaatcgtcttccgactgggaactatctaagatcacagaagttggtggttcttggaaggatgagttctggactatcgttcttgcggttcccgcgatcctcgttatgttagctcctgttgtggaactgcttttgttccccggcgaatatcataaaggggatttcatcaaagcagtagtcggtggcatgcaagccctagataccgcgcctgattggtatactgcttcattattgacagcaattagtgcatcattcggtatcaaaggctacaaccac…	MAIPLVSMIPGALKQLWNLGTDLIQYKREIVSAKHDVKLEAIKSSSDWELSKITEVGGSWKDEFWTIVLAVPAILVMLAPVVELLLFPGEYHKGDFIKAVVGGMQALDTAPDWYTASLLTAISASFGIKGYNHFKSNSRKAQAVDALKQFGVKVVSKDPTVVTQSGSPDLESAPPAGSTATSGAWPDLKK
2146	fig|6666666.475224.peg.121	peg	2146_82533_83060	82533	83060	+	hypothetical protein				atgaaaattttagcagaaaccgcaaacaaaaacacagttttgtctgatgcaggtgaaggccacgttttcggtaacttcttcggtgctgtggaaggcgacaaaatttctgctgggcgttacatggtcgtatatcatcctatcatgaaaggcgttcgccaagagatgaaacaaaaatttgactcctacgttgacgccatgcagttcttcctgttccagaagcgccatgagcgttttgtagaagccaaagacgccgggctggacgatgcaactgccgaactgatcgccgaaggaaaaattactcttgaagccgctctgggcgatatggatatggacgccgaagcacattggattgaatattccgcatatcagaacgaatgtgaagatgacccggaagatgac…	MKILAETANKNTVLSDAGEGHVFGNFFGAVEGDKISAGRYMVVYHPIMKGVRQEMKQKFDSYVDAMQFFLFQKRHERFVEAKDAGLDDATAELIAEGKITLEAALGDMDMDAEAHWIEYSAYQNECEDDPEDDGFDPDLHGGEDDNTPPLEILMAGGQAAWEWQNEKNAWLDSRL
2146	fig|6666666.475224.peg.122	peg	2146_83595_83143	83595	83143	-	hypothetical protein				atggcaatctccactttattcgaatctgaatcaatactggacgctccaatctggactggcgttcaagacggcacaaccatagaattttttgagcgcggggaaactggcgccgaagagatctatgcatccgtagaaggcaccgacgttgttcgtgctgctatcgccctggcaactttcctggaagacgctccgattgatggagttcctttcgaggcacacgtcgaccccgatgatctgaccagcatcatcattaccgttcagggtatggaatatacgtcatacagcattgagcacgacgaagaaagcgacgcgctttatatcgccaccgacctgcagctggaagatgatgagattgcttacctgcaacagaatggtaaactgccggagtattcggatgaa…	MAISTLFESESILDAPIWTGVQDGTTIEFFERGETGAEEIYASVEGTDVVRAAIALATFLEDAPIDGVPFEAHVDPDDLTSIIITVQGMEYTSYSIEHDEESDALYIATDLQLEDDEIAYLQQNGKLPEYSDEDLDTELADVDDDDDFWE
2146	fig|6666666.475224.peg.123	peg	2146_84867_83662	84867	83662	-	DNA repair protein RecN				atgaacaaaaccatatttgacgtcctttcactcagtcgtgaccaggtccactgggaagactacctttacaaacacaccccgtgtgaacttgtttccaaccccgaaaccaaccaacaggtctggtttaaacgtgaagattacttcgcgccgctgtcccagtacgccaatggtaaacagggcatcaacggcagcaaactccgtcaggctatctggctcatggttgagcatttaaaggccggaggctcccccgatatcatccatggtactgtcgttggtagtccgcagtcccctatggcgacggcagtctctcggcacttcggcgggcatacgactacagtcctgggcgcaaccaagccaaccacttgtatgaaccacgacatggtggcaatgtctgcctgg…	MNKTIFDVLSLSRDQVHWEDYLYKHTPCELVSNPETNQQVWFKREDYFAPLSQYANGKQGINGSKLRQAIWLMVEHLKAGGSPDIIHGTVVGSPQSPMATAVSRHFGGHTTTVLGATKPTTCMNHDMVAMSAWFGSIFNFVGSGYNSTIQPRCKKLIEQQNPKAYYLEYGITLDHKLHSPERIAGFHMLGGEQVANIPDHITDLIIPAGSCNSCTSILTGLAMHPKPNLKNVYLIGIGPNRLDFIESRLRIIGEYANLPHIVDFTRHYHDNPDYLYGKKDAPQSPKSVSLLGLLGRYDPKELERADGSPRFNVHHWDLHTTNWVRYNDLMEYQWGDIELHPRYEGKVMTWIQEHKPELLNENSLFWIVGSKPYVEPMKAACPELGDIPGSDHIFVDTFI…
2146	fig|6666666.475224.peg.124	peg	2146_85532_84936	85532	84936	-	putative uncharacterised protein				atgcgcaatgttactatctgggaattgaacgacgtggtcgttgacgttcctccattcgtccgtatgtacacatacaagggctacaagggaactctcaatgagttcttgtatccgaactttgttcaccgtgaagatcacatcatcccgcgcaaccgcaacactccgggtaacgccatcccctgtaagttgttccagaaaggtatgactgtcattgtcgggtactcttcactggattgtattgagaaaggcgacggtattcccatgctggtgttcaacacgtttgaacaagccgtgaactggatggttcgtaacaattacgatttctatggcgaagagagttctcatgcccgccgccgtaaagtgaaagcagttgatttcttcactgagcgccggaaatat…	MRNVTIWELNDVVVDVPPFVRMYTYKGYKGTLNEFLYPNFVHREDHIIPRNRNTPGNAIPCKLFQKGMTVIVGYSSLDCIEKGDGIPMLVFNTFEQAVNWMVRNNYDFYGEESSHARRRKVKAVDFFTERRKYIEIARDYETMVRSREVPVKPTFPEVQTVTESYTQQPAPESKKISSGRKRGGFLSEILKFLDIFRK
2146	fig|6666666.475224.peg.125	peg	2146_86121_85603	86121	85603	-	conserved phage associated protein				atggctattttaatttctccatatttgggaaatatgctacagacacatcgtataaaagtagaagtaagattttctgggcttactgcttatttgtctgctggcgcaactggtgttgatctcttaacgttgttggatggcaaaaccccgcatcctgcttctgtgactggattagcccctttcttcaaactttctgatcataaattccatgcatttcctgtagactctatattacctgttaaagtgaatataatcggatcatggtcaggttctactgctaacaggacaatgctattggattttgtcggatctaccggcaaccagttgtcaaagagtcgtgattccagtttaccgcctccagatgttctctctttcatcacattcttcagtgtagacaaagca…	MAILISPYLGNMLQTHRIKVEVRFSGLTAYLSAGATGVDLLTLLDGKTPHPASVTGLAPFFKLSDHKFHAFPVDSILPVKVNIIGSWSGSTANRTMLLDFVGSTGNQLSKSRDSSLPPPDVLSFITFFSVDKAGNLATNGAQMKLYSYGGDFTINEIVLIAEQVVPLYMNTI
2146	fig|6666666.475224.peg.126	peg	2146_86366_86130	86366	86130	-	phage associated protein				atggctactgccaaaatagttctagatgcgagtacatggactcaagtctctgacggcacatctttgaaaacactacaagtgactcaaggttccgtgtatttgtgcgacaaccccacgacgcccgtttccggggcggcatctcatatcatttatcagggtaatatcatcgtccttaccccgccaaccattggctgggttaaaggaacttctgctaactctgttataatagtttcgtag	MATAKIVLDASTWTQVSDGTSLKTLQVTQGSVYLCDNPTTPVSGAASHIIYQGNIIVLTPPTIGWVKGTSANSVIIVS
2146	fig|6666666.475224.rna.1	rna	2146_86726_86656	86726	86656	-	tRNA-Gln-TTG				aggagcatagccaagcggtaaggcaatgggctttgatcccatgatctcaggttcgaatcctggtgctcctt
2146	fig|6666666.475224.peg.127	peg	2146_86921_86805	86921	86805	-	hypothetical protein				gtgtataaaatgggggtgactccacatcggaaacgatgtcccaactaccagaaatggtttggcgcgaagcctgtaaagttccaggagatcaaaccagaaggcactggtgccagttaa	MYKMGVTPHRKRCPNYQKWFGAKPVKFQEIKPEGTGAS
2146	fig|6666666.475224.rna.2	rna	2146_87389_87317	87389	87317	-	tRNA-Asn-GTT				gatggtgtagttcagtcggtagaacggcggtctgttaaatcgtatgtcgcaggttcaagtcctgccaccatcg
2146	fig|6666666.475224.rna.3	rna	2146_87482_87400	87482	87400	-	tRNA-Ser-GCT				ggaagattggcagagcggtattgcagcaccctgctaaggtgtacaaccgaaaggttgcacaggttcgaatcctgtatcttccg
2146	fig|6666666.475224.peg.128	peg	2146_87658_87482	87658	87482	-	hypothetical protein				atgaaatcgttcagtgattatctcagtgaatgtaatgacgagtcgatagttgagtttgttgaaaagcgtggtgaccattgggttgtgttggatcataccaaaacaaaggttttgggaacacatgactccaaagaagacgctgagaagcaacttcgagccatagaagcgaataaatag	MKSFSDYLSECNDESIVEFVEKRGDHWVVLDHTKTKVLGTHDSKEDAEKQLRAIEANK
2146	fig|6666666.475224.peg.129	peg	2146_87833_87675	87833	87675	-	hypothetical protein				atgaaaggcaaagtatcattaaaagaaaagattcgccgttcagaacagtctttgaacgaaaaatctgatggtgttttgtataaagatggtgatggcaataatttcactatgacaaaaactgctgttggttacagaataaataaaccagttgttcaataa	MKGKVSLKEKIRRSEQSLNEKSDGVLYKDGDGNNFTMTKTAVGYRINKPVVQ
2146	fig|6666666.475224.rna.4	rna	2146_87926_87853	87926	87853	-	tRNA-Arg-TCT				gtttccttagctcagctggatagagcaacggccttctaagccgtcggtcacaggttcgaatcctgtagggaaca
2146	fig|6666666.475224.rna.5	rna	2146_88005_87933	88005	87933	-	tRNA-Met-CAT				ggtcctgtagctcagtggttagagcagtcgactcataatcgattggtcattggttcaaaaccaatcaggatca
2146	fig|6666666.475224.peg.130	peg	2146_91910_91341	91910	91341	-	putative uncharacterised protein				atgcacattaacaccgcagttatgaaacacatcattcctttattagaaaaatatgaaggacaacaagccaccaaaatttctttgacgacaattgctgaggaagttaaactcctgacaaataaaggggtaaatttccgtcgcgttatcgacaatgcggtttcccttgctcgttctgatatgaaacacaacaccttttcatttaacatcgacgtcacgagtgagttccgcaacgaactggaacaatcttccaccgcccgccgcgaccgcttccgtcatttatatgttcgtcccaacatgccggaatgtcgtattgggatcaaactggaagccgtccgcacggacactgcgttcacgatcaactatgttctggaaccagaaagccagcgcatctacttcgtt…	MHINTAVMKHIIPLLEKYEGQQATKISLTTIAEEVKLLTNKGVNFRRVIDNAVSLARSDMKHNTFSFNIDVTSEFRNELEQSSTARRDRFRHLYVRPNMPECRIGIKLEAVRTDTAFTINYVLEPESQRIYFVAIIGFYGNAINGWCDRVNLGETTNSHSIPSTHYMSNAAAQEYVFILEKVVKFSVVK
2146	fig|6666666.475224.peg.131	peg	2146_92265_94046	92265	94046	+	Phage baseplate wedge subunit (T4-like gp6)				atggctacacaaacagttccttcactcgacgtcagggctttcgaatacattatcaagcagcgtatgaaagctgatccgaccttcaaggattatgactttgaaggatctggtctcagtgctatcatccgtctgcttgcctctgacgcgaatgctatcggctttatgcagaatatgctgaacggagaaagtcacctccaatccgctcaacaacgttcaaatgttggcttgtcatctgcattcttgtcgtacactcctgagaactatcaggcggcgtacatgtatgcaaatgtcaaagtcaccccctacgatgcgaccacagcaccaagcgaaatcatcatggatcgcaaggttatgtttgttggggccaaagatgggaagtcttacaacttcaccgttgag…	MATQTVPSLDVRAFEYIIKQRMKADPTFKDYDFEGSGLSAIIRLLASDANAIGFMQNMLNGESHLQSAQQRSNVGLSSAFLSYTPENYQAAYMYANVKVTPYDATTAPSEIIMDRKVMFVGAKDGKSYNFTVEKPVSTTLRPEGYYLFENVKLIQGDWLYKTYDVEGSAISTYKIPSTNVDINHLVVNVQESETSDVSNTFDRYNSPFDLNQYARLYFVELGLDGFYTFEFGDGYICRRVEDGNVVFLQYLETSGADGNDITSVSSATAIAGNNLVDIELVSERSAGGTDPESIEDTKRLAPLSYQADGAAVAETDYAYLTEKLFSNVLRAKGYGGDTLNPPDPGYVYIAVIPTVGETLSDAEKADIVSTLDKYNVGSITPKVVDAEVTYIQVNTTIFW…
2146	fig|6666666.475224.peg.132	peg	2146_94030_94881	94030	94881	+	phage associated protein				atgtccaaagatcttaataacggacatctgggcgtcaaatatgagacgccgttgttctaccagaacgatttccctctgttcattgagttcatggatacgttcttcaattggctgtatcgccaaaacggtttcactgaagaagaaattcttgcttacctggcggacaccagttggctgaatccggctagtgacgccagcccgctgatgcagctggtagacctgaagatacagaagacgcccggtactgctgcgcgtgatatgctccttgacaaatatctggtcaggacatttgagcaaatgatggcgcttgatactgaagaattgttggactctgatgggcgtcctctattttcacctgaagacaagaattcaagtattgacgcctggtataaagaattc…	MSKDLNNGHLGVKYETPLFYQNDFPLFIEFMDTFFNWLYRQNGFTEEEILAYLADTSWLNPASDASPLMQLVDLKIQKTPGTAARDMLLDKYLVRTFEQMMALDTEELLDSDGRPLFSPEDKNSSIDAWYKEFGFQRTVDKSFPEFGFFVPEGSDGLITADGNQFSVYIEGTRRRTLDHTRWLKLLKHIYKIRGTQKAIELFFWIYFGVPVTVYYPKEDLAGLDANFDCDGEVGLRDDYYYDEYTYVIRIPGDVADFEGVFDRVFRQHFHPSGFKVFLESTRS
2146	fig|6666666.475224.peg.133	peg	2146_94886_96139	94886	96139	+	putative uncharacterised protein				atggctgattatctgagcaaatatacaggccagcagatagatagtattctagatgcggtcgatggaaaactgaacaaaactgatgtcgtgaatgatatcacggtagatgacgacctgtctccggcgtcagcacatcttacgttcgtcttgaaatctgctatcgatacaatgaacgatgttttgaccaataaagtcgttcggaccgatgggcaagaacaaacgataaacgggaaaaagacttttgcgtctgtggtgaatgcaaatggtggcatcgtagtcccgacccaacgctccataacgatcacggatgaacctgcggccaacacggatgcggtgaatctcagcatgttgaaaaaacatgggctgagcactgtggactccgttggttctggttctggt…	MADYLSKYTGQQIDSILDAVDGKLNKTDVVNDITVDDDLSPASAHLTFVLKSAIDTMNDVLTNKVVRTDGQEQTINGKKTFASVVNANGGIVVPTQRSITITDEPAANTDAVNLSMLKKHGLSTVDSVGSGSGLKISLLSNGYNKLEVDLSNLVVRTDSTSPQSLAVYSPTGGSQIWSMTSLFNSIFADTRFNGYVKVVDYDSDMLNIETQFTSVNNRINLKLDTSTYTTKMTSLDSQIANLQSGKVDNTTYTTKMTSLDSQISGLSTNKVDKSTYDTKMASLDGQISDLATNKVDVSTYTTDMNALNLALAGSVKLAKTNTTSVSVPASGSAALPDFTLVNLCQILITAKWGTLVDTFLITMTYDGTLQATSLTQKSTAGTLSFTGSVVSGKLRLTMT…
2146	fig|6666666.475224.peg.134	peg	2146_96191_99220	96191	99220	+	hemolysin-type calcium-binding protein				atggctaataaacccacgaaaccaaattttccgcttgggcttgaatcacaagatcaatccgtatttcaagaaggtattctgaataatggtgttgtagaacatggcccagatgcggtaatgactgtgccagaaactcctgacgcatctggggttccttctgctgtccgttataacgaagacgacgatcaattcgaaggctactacaacgaaggcggctggttgccgcttggtggtggtaacggtgggcgctgggaagcgcttcctcatgcttcctcttccctgttacaagcaggacgtgcatatctggtagataatacggacggcgtctctacggtgctgttcccttcccctaaacgtattggtgacagtgttactgtctgtgacctttacggtaaattt…	MANKPTKPNFPLGLESQDQSVFQEGILNNGVVEHGPDAVMTVPETPDASGVPSAVRYNEDDDQFEGYYNEGGWLPLGGGNGGRWEALPHASSSLLQAGRAYLVDNTDGVSTVLFPSPKRIGDSVTVCDLYGKFSTYPLTVDGNGKSIYGSADSMTISTDNVSATFTWTGEARGWVITSGVGLGQGRVYSREIYSQILSATTPSITLSTQPSIVDVYVDGKRLKESLYTLDGYEVKFDPALASGSDVQIIQYIPIQLGAGGGGSGGTVITWEYNGGSAIGGETQIVLDVVVDSVSEIYIRGSRQQIGRGFTFDPATSTITLADELDAGDDVVVVINGDPTVYNQIDRTPWEVARAFNVSNNSVIMSNDRNTTLDGKTIVYDINSQNSWEIPAGIPVGSKI…
2146	fig|6666666.475224.peg.135	peg	2146_99222_99458	99222	99458	+	hypothetical protein				atgaatataaattgtgtttttgtgaaagacgaaattccccttgagaaacaagacgactttttgaaattatttttggaaagaatatcattggaattctctgatgtcatgataacggcagaatggggagacgatgaaactgctgtcgtttcagaggattgttctgattacgtcaaagcaaattatcaaagatttgtagacggtcttaaacaagacctcattattttcgattatttctaa	MNINCVFVKDEIPLEKQDDFLKLFLERISLEFSDVMITAEWGDDETAVVSEDCSDYVKANYQRFVDGLKQDLIIFDYF
2146	fig|6666666.475224.peg.136	peg	2146_99487_101802	99487	101802	+	Unclassified maturation protein				atggggtattttcaaatgaccagaaacgtagaagaaattttcggtggggtagtcgtagcaccccaccagatcccgttcaagtacacttcaacaaacggtggggaaactttcctttcccttccattttatcctatcaccgggttcgttactatcaacagcggtgtgcaggttcctcttgataatttcgaaatagacgggaatacattaaaccttggtcgcgaactggaaccaggggatgtcgtattctgtctgtttgataaaatcatgtcgccattagacaccagtagcgctgtacgcatatataaatttctttctgtcggtggtgaaacagaattcacaccagattttactgcatatggtgtacagagtctttatatcgatggtaaatacaaaatagcg…	MGYFQMTRNVEEIFGGVVVAPHQIPFKYTSTNGGETFLSLPFYPITGFVTINSGVQVPLDNFEIDGNTLNLGRELEPGDVVFCLFDKIMSPLDTSSAVRIYKFLSVGGETEFTPDFTAYGVQSLYIDGKYKIAGLDYTYSPVDGKVTFTSPVASSVWVVAEMSVKESNNSVKNEVISIQENTRELWKRSLSDAGINLVEGSFEEGATLENANDAIWYQSGNNCYVWSGSLPKTVPPKSTPESTGLAGWTTTEDYTIGVILASPKGDVKIDAIYYIRPERFGAIGDGVTDDTIAFQAAINASKGKTLLCASDKKYRIKNVVVPHEMTFQGWGRRMGGAIIPYGNEGSNIHSGTLITLSATGTVNWVNMTVDARGVSLSSVDGQRLTGVGAVDNSSGVYQS…
2146	fig|6666666.475224.peg.137	peg	2146_101813_102091	101813	102091	+	hypothetical protein				atgacatttgaagaagcgatgaaatcagtaaagaataacatggcaattgccatgtctaactggaacggcgaaactgagaaaacgacgttcgttttcctttctggtggatttcaaggcaatgtcgggaatgatttccctttgcttaaaaatatgggaattgaaactatgtatgtccaaagccgattggacaaacgtttagaaactggcgaagtcattttcggatggtcaccatctcaagaagaaattctttctaactcttgggaagttatagaagtttaa	MTFEEAMKSVKNNMAIAMSNWNGETEKTTFVFLSGGFQGNVGNDFPLLKNMGIETMYVQSRLDKRLETGEVIFGWSPSQEEILSNSWEVIEV
2146	fig|6666666.475224.peg.138	peg	2146_102146_104128	102146	104128	+	Phage tail fibers			isu;Phage_tail_fiber_proteins	atgaatccgcaatttagtcaggccggtggttccgtctctaaagacgtgaacaaacaatctatcgcacgtgtatacggcgttaaaatgagcgaagtcgcttatttgaaagccggattagtattgaatggttataaggtgttgtttgataaaacaacccaaacttgttggaaaagtggcaacgccacaggtacatcgatttcctggcaagtctctggtagctctctgaacttagtaactactactggctcgtatgtactacccctttttgacatacttgcaaaccttggttcaggcgagggacttcttcaaataggaagtgtagctaccattgctcaattatccacagtctcccccgtaacggtaggtcagcgcatacaagttaccgaatatgctttaggt…	MNPQFSQAGGSVSKDVNKQSIARVYGVKMSEVAYLKAGLVLNGYKVLFDKTTQTCWKSGNATGTSISWQVSGSSLNLVTTTGSYVLPLFDILANLGSGEGLLQIGSVATIAQLSTVSPVTVGQRIQVTEYALGYVVGGGNFIVQKSSDYTVDGGKVVASATSGLVFVREEYYASRTVKPEWYGCRGKGSAIPDTVPFKTMLGALVNGDYIRLMANAVYYNSFPNNSQAIDGWTITADNITLDGVGGATLSRATPSSASYSGFTTLKIAGSKNPRLVGSLLITSDDPTNRPLYAYQSLTKIDSREIFTSPLANTLGLWASGVDGLYIDKSVILERAVFPYFANNGTKNKKVFCTARKSGQIYPQPTSASSDLALGSTFKLDACSDFIMEVVANDSAYAGI…
2146	fig|6666666.475224.peg.139	peg	2146_104139_104288	104139	104288	+	hypothetical protein				atggttgaacttgatgagatgtttagtaaccgtgcagtggttgcacaggctctttcggaggctcaggagatggccgtccagactgatgatggaaacgggggggaacttaccctggaagaccaaatagcatttgcacaagctcaggagtag	MVELDEMFSNRAVVAQALSEAQEMAVQTDDGNGGELTLEDQIAFAQAQE
2146	fig|6666666.475224.peg.140	peg	2146_104436_106601	104436	106601	+	hypothetical protein				atgaaaacgcagttcaatcaatcccaaggctcgacttcacgcgaaaccaacaaagaagcgattgctcgtatctttggtttgaagaagtctgatgttagttacttaacgacgaatatccctgtagattcatacactattctttatgacaaaacaacacaatcttgttggtatcgaggtagttcgtcaggcacgccgatagcttgggcgagttctgatgatattttacaggtcacaacgacttctggaacgtttttcttagaaaaagccacccaattaaatgaagtgttatctgttttgtcaacagtaaatggggctgactcaataggtgtgagtactggcggtacagtagaagatatgcttcaatgcattactcctgaaatggtaagagtaaatggtcaa…	MKTQFNQSQGSTSRETNKEAIARIFGLKKSDVSYLTTNIPVDSYTILYDKTTQSCWYRGSSSGTPIAWASSDDILQVTTTSGTFFLEKATQLNEVLSVLSTVNGADSIGVSTGGTVEDMLQCITPEMVRVNGQRYVHGVTTDAVPFVQAAVDLANQKGLPTLLLRTYPMVSAPQEYICPGDDGTVYPAWITAGTDVNIAPEPTNKMNAHIRLYNNSRLVGVNMQTCGLRSNWSKTAGPYDLTGPIVLFISPGNKDSYVRYYLENLTISNGFIGRVCEGTSAFSYENNLQISGCGIPGIFQGEDSVDRGFIKLWYNLAGDVFGGQWLTRNHAYASSYMPPYPATDIHRAGWCDSSFVEKYHYYGDTSFDWTHPANAAIDNFFATYFFKPENSAKTADGGR…
2146	fig|6666666.475224.peg.141	peg	2146_106615_106881	106615	106881	+	hypothetical protein				atgtcttttactctgcagaaaacagtaacagcaaccaaatcttacccaagccttcaaaatgttttgaagcaaggtgaagaagaaattatagaagtaacatatgaggtgcatactataatttccctcacaggtacaatggggatcgcagaatattctgttagcatacccaatgcagataaattgggtagtggtgttgtggaatttgcatacaaaggtggatccccattcgaagaagccgaacaagttttaaaagcttctctcagttag	MSFTLQKTVTATKSYPSLQNVLKQGEEEIIEVTYEVHTIISLTGTMGIAEYSVSIPNADKLGSGVVEFAYKGGSPFEEAEQVLKASLS
2146	fig|6666666.475224.peg.142	peg	2146_106973_111811	106973	111811	+	Phage virulence-associated VriC protein				atgcaacaattgaatcttaaccgccgcccgtattgggacgactggaatccagagaagcgtttcagccgcatcctgttccgcccgaatccaatcaaagtacagaccagggaactgaaccagctgcagactatcctacaggatcaaattgagaagattggtaatcatcttttcaaagatgggtctatggttattcctggtggtctgacaatcaccaattccgcagtttctatgaaatttcagctggcgggtgggagcgaattcaccgacctcgaaggcattcaagaactttatgtgattggtaaggacaacaacgccaaggcccgtgtattgtctctggaacgctacaccagtgaaccggatatgatgttctgtatcctggaaatgaccgagtccggcact…	MQQLNLNRRPYWDDWNPEKRFSRILFRPNPIKVQTRELNQLQTILQDQIEKIGNHLFKDGSMVIPGGLTITNSAVSMKFQLAGGSEFTDLEGIQELYVIGKDNNAKARVLSLERYTSEPDMMFCILEMTESGTADGFSPNDNLYFNTYDVNDNFIRIGYGVAQTVGGSIVARMTKGVYFVRGFFLDVDDDMLVVNKYANNTSHRVGFKVTEEIVTEEQDSSLFSNAQGTPNTKAPGAHRLRLDLSLQAFDYDAEVEDFVELAKIKDGKIQSMVTQSTYNILEDTMAQRTYEQAGDYNVSTHQIDLREHLKENNNGGVYTPSEGGDESKLVAVMKPGISYVRGRRIENVGEELVVIDKARDTDLLNNTPVAVATGNFLTTKNSKGVPVISRSIRYKLLNA…
2146	fig|6666666.475224.peg.143	peg	2146_111862_112110	111862	112110	+	putative uncharacterised protein				atgcgtggaatgaaagtacaggggcacgcatcaatggtacgcagtagctcttgccccggagcaatcatctgcactgaccatgttgctggaatggcggcgcttcggtctcgccaagatactgaacaaagagaggctaagattgcccagcaatcggcccaaattgatcagcttgaagcaaccgttaaaatgttggcagaaaaactcgggattacaatcccggacgggggcgaaaatgacaacgcagaataa	MRGMKVQGHASMVRSSSCPGAIICTDHVAGMAALRSRQDTEQREAKIAQQSAQIDQLEATVKMLAEKLGITIPDGGENDNAE
2146	fig|6666666.475224.peg.144	peg	2146_112190_112432	112190	112432	+	putative uncharacterised protein				atgggtggattggaaaaccgtgtgaatgttctggaaaaagactctgggaaagttgaccagattttggttaaggttaatgatctcagtgaaaggatggccgtcatgaacaacgatatatcctacgttaaacaaaacgtgtctgaattgaaattaaacagcagcagcctttctgacgacgttagaacattgcgcctgactgtttcagatatacagcgcaaggagggtgttaatggccgtcaataa	MGGLENRVNVLEKDSGKVDQILVKVNDLSERMAVMNNDISYVKQNVSELKLNSSSLSDDVRTLRLTVSDIQRKEGVNGRQ
2146	fig|6666666.475224.peg.145	peg	2146_112419_113171	112419	113171	+	Unclassified head-tail protein (gp13)				atggccgtcaataagattcgggacaaagattcatttatgaattatgtccttcgcaaattgggtgcgcctgtcatccagatcaacctcgacaaaacacaagttgaagacgcggttgatgatgctttacagaagttttgggagtaccatcgcgacggtagccaagatgcattcttcctttaccaggtgaagcaggaagacatcgataaaggatatatcacctttccagaagatatcgatgacgttgtcgaagttatccaagggccaccaattgaatctatcggtaactgggcaaccccccagtggcagatggctcaggcgatgttagtgcccaaagctgctttggtatctatccgtcttatcgattatgtttctatgcagcagcgcctttccgatatcacc…	MAVNKIRDKDSFMNYVLRKLGAPVIQINLDKTQVEDAVDDALQKFWEYHRDGSQDAFFLYQVKQEDIDKGYITFPEDIDDVVEVIQGPPIESIGNWATPQWQMAQAMLVPKAALVSIRLIDYVSMQQRLSDITSVLNVRRAFVYKKFQRRLYPQFSAVIDEVLAFKCYQNIDPTAEENTEAWNDMWLKAYATALVKRRWAEVLKKARGIRLPGGIELDGDSMFSEAEAEIERLEEELRTGQQYPIDFFMG
2146	fig|6666666.475224.peg.146	peg	2146_113412_113200	113412	113200	-	putative uncharacterised protein				atgcaggttgaagacatcaaggaaactcgtgatggaagtcgagtaagaatcatctgtgtggatgctaaaatctcaggtggtgattatgatatcgtcggtttgataaaacaatctgacgggaatgatttcattgaatggtgggacagtaataacgtccatgatgggtatattcaggcgacttcgctccctgggcctcgagatatcaaaatctaa	MQVEDIKETRDGSRVRIICVDAKISGGDYDIVGLIKQSDGNDFIEWWDSNNVHDGYIQATSLPGPRDIKI
2146	fig|6666666.475224.peg.147	peg	2146_113474_114115	113474	114115	+	Phage head completion protein (gp14)				atggccacttcaaaatatttcaactacacgaaccaccaaggcacgcagaagttaattgatgacctcgtggtggagatgatacaattacgtgggatcgacgtcaagtatattccacgcgccatttatgaaaaatacccaattttaaacgaggcagaacaccgtttcgaccaggcgtttgatattgaggtctatatgcaggactaccagggcttcaacacccaaatgtgggagaagttcggcggtatccagctacaagatgaggtgacatttactatcgcccgtcgccgctttgcggaagttattggcaacgggccaggactggatcaacaacctcaggaaggggatctcatttatcttccgatggcgaataaaatattcaaggtcaacaacccgaataat…	MATSKYFNYTNHQGTQKLIDDLVVEMIQLRGIDVKYIPRAIYEKYPILNEAEHRFDQAFDIEVYMQDYQGFNTQMWEKFGGIQLQDEVTFTIARRRFAEVIGNGPGLDQQPQEGDLIYLPMANKIFKVNNPNNDEDFMQFGKWYTYSLPCTLFQYGNEDFDTGVPEIDDIDKRLQDLEGDGIYQDATLQTDNQFADEIEEDLSTNNVKIDFGE
2146	fig|6666666.475224.peg.148	peg	2146_114118_114816	114118	114816	+	Phage tail completion protein (T4-like gp15)				atgagaccttttcagaattatttttaccatggttcactcctgaaatatatccatgtgttcaacgctattatgtctgacgttcaggtgaaaaccgagcgcggtattatgaaggtcccgttacacatggctattggtcgccgtaatgacctgaaccgaaatgttccggcgaatgcattaccatttgcgacgatgtctttcggtcaatttgaaatcaataaacaggtaacgaattcgtatcacaacaaattggcgactaatactgcgacgtctaagcaacgaattccaatcatcatcgactttgaatacaatgtgcgtacaaagaagatgaatgaaatgcttcagatcctcgaacagatttattctgtttacaccccttcaatagattgccagataaaggac…	MRPFQNYFYHGSLLKYIHVFNAIMSDVQVKTERGIMKVPLHMAIGRRNDLNRNVPANALPFATMSFGQFEINKQVTNSYHNKLATNTATSKQRIPIIIDFEYNVRTKKMNEMLQILEQIYSVYTPSIDCQIKDNETLKQDQVVKIQLVSHTMSDNWEGDAAESPHVDCNFMFQLHGAIYGWDYWVDDGSGTGDPNVIKEIIIEMSTDLNTPWTELPLWFTVDKDGVHHPEDD
2146	fig|6666666.475224.peg.149	peg	2146_114819_115505	114819	115505	+	Phage terminase, small subunit				atgtctaatatgtcagaacgtttgttacagaccttagatgctgtctcagcacgagatgaggttgctcaagatgcgatgaagaaaaccgcattgaagcccggtgttgattatgatgaagaaacgggggagtggttaggtgatcccccggaagggtatcaaggattcgagatgccgccatcattgtctgaagtcgcgtcaaaagaatcaaaagttcctgaatacgaggacactgatgccacgactgactacaaacgtattcgtgacaccacatatgctatgcaagaagccacgatgttcatgatgggcaaggccgctgaactcgccgcttctacagaggctcctcgtgcattcagcgtcttccgcgagctgggtgaactcatgcgtggtctcaataaagac…	MSNMSERLLQTLDAVSARDEVAQDAMKKTALKPGVDYDEETGEWLGDPPEGYQGFEMPPSLSEVASKESKVPEYEDTDATTDYKRIRDTTYAMQEATMFMMGKAAELAASTEAPRAFSVFRELGELMRGLNKDLMENQKTIKDVTRDKEPPGQTTVEVSEDENGTTTVKVGKTARSSRDLLQMIEKVRRDAEANRNSRVNPDEEVIDVAEEPKQEEKSEGEDDGVSEA
2146	fig|6666666.475224.peg.150	peg	2146_115486_117696	115486	117696	+	Phage terminase, large subunit (T4-like gp17)				atggcgtatccgaagcgtgaagtcgaatatgccccggtcaagacggggtttaaaattgaagacgtcaaattgcgtatggaccaaacgttcatgcgcaagccgactgtgcgtgctcctcgtgttgaattagtccttactgatgagcaggaagaagaatatgtcaagtgcgctatggacgcgcactacttcgctgcgaactattacaagattaccactatcgaccatggtttcatcttatttgacatgcacgattatcagaagcaattgttccatgatttccaggatcatcgattcaatgctgttgtgcaggctcgtcagtctggtaaatgtgttcggggcgactctgaagtttatgtttacgatactctcagccaggaagagttctctatcaccatagag…	MAYPKREVEYAPVKTGFKIEDVKLRMDQTFMRKPTVRAPRVELVLTDEQEEEYVKCAMDAHYFAANYYKITTIDHGFILFDMHDYQKQLFHDFQDHRFNAVVQARQSGKCVRGDSEVYVYDTLSQEEFSITIEELHSRFEDVNHAEPLNTIGKHNKFVDSRFGKRYFVKSDSGWVPVIAAHKTKEYAEYVVKTESGRTIHVADEHLFFNEYDREVFAKDLEAGDAIMTQDGLECISEIWETGESHHMFDLQVKSSEQRYYTNGFLSHNTTVVAAFLLWYAMFNSDKEIAVLANKEKQAIEILDRIRKAYQDMPFFVQQGCEKFGSTLIEFENGSKIFAYATSSDSIRGRSVSLLYVDEVAFIENDFEFWESTFPAIAQAETSKCILTSTPKGQRGLFYD…
2146	fig|6666666.475224.peg.151	peg	2146_117749_119644	117749	119644	+	Phage tail sheath protein (T4-like gp18)				atggcaactacaagtttcagcgttgcgccgtctgtacagtggaccgagcgcgatgccacgcttcagacgtctccgtccgttgttgttcagggcgcgtctgctggtaaattccaatggggtgaagtagaattgcccgttttggttactagcggtgagactggtctggtgaagaaattcttcaaaccgaatgatgataccgcgatcgactttctggtcatcgctgactttttgtcgtacagttctgctgcatgggtgacccgtatcgtcgggcctactgcaaagaatgccgtgactaaaggtcagagcgcgatcctcatcaaaaacaaactggactttgagaccgcaagtccgtcggcttctattacgtggactggtcgttatcccggttctctgggcaac…	MATTSFSVAPSVQWTERDATLQTSPSVVVQGASAGKFQWGEVELPVLVTSGETGLVKKFFKPNDDTAIDFLVIADFLSYSSAAWVTRIVGPTAKNAVTKGQSAILIKNKLDFETASPSASITWTGRYPGSLGNDIAVNICDAASFPTWEFRNNFAYAPQAGEFHVVIVDKVGRITDSSGAVGQVDRISISGTATAAGAITVAGESVAYLQTDTPATLAAKIGLEMEALTDVYSSVVVKSNTVILTHKAIGPQPVTAVVPDANGLTGTAIITTVGASGTIIEKYELMQNTQGAKKSDGANAYFKDVINNTSNWVYTFTNALAAGVVELEGGVDDYDVNRVAAIEALNNAEAYDAKPVFAYCEELIEQQAIIDLSTNRKDTVSFVSPLRDVVVGNRGREMD…
2146	fig|6666666.475224.peg.152	peg	2146_119713_120168	119713	120168	+	GIY-YIG endonuclease				atgatatttgcatacaaaattgaaatgatatctaacaacaaggtctacatcggtgtgaccaatgatccgcaaaggcgatatgagcaacatttggccaatgcatttcaatataatgttgaaagtgaattgtatgatgccatgcgcaaatatggggcttctgcttttactttcgtgattattgctcaaaccgatgaagtccacaaatgggaattggaaaagcaattaattgctcaatacgattcttatgaattgggctacaacatgaataaaggcggtaacgatggaagtcatctggttggtaaagctgctgctaaattgacctccactggagaacatattggtatggtctcattaattgatccacgttgggatctctgtgagattgaaccagtacggaac…	MIFAYKIEMISNNKVYIGVTNDPQRRYEQHLANAFQYNVESELYDAMRKYGASAFTFVIIAQTDEVHKWELEKQLIAQYDSYELGYNMNKGGNDGSHLVGKAAAKLTSTGEHIGMVSLIDPRWDLCEIEPVRNNVDHGFDLSKLTIKRLTD
2146	fig|6666666.475224.peg.153	peg	2146_120203_120736	120203	120736	+	Phage tail tube protein (T4-like gp19)				atggctacagtaaatgaatttcgcgcggccatgtcacgtgggggcggcgttcaacgtcagcaccgctggcgtgtgactgtaaacttcccggcattcgtagcgggttctgacaccattcgtgacgtatctctgttggctgtaacaaccaacaccccgacaggccagctgggtgagattctcgttccgtggggtggccgtgaactgccgttccctggcgaccgtcgttttgaggctctgcctgtaacgtttatcaacgttgtagacaacgccccgtacaacgcatttgaaatctggcagcagtatatcaacggcagcaacaacaaccgtgcgtctgctaacccagatgattatttccgtgatattatcatggaactgctggatgctaacgacaacgtcacc…	MATVNEFRAAMSRGGGVQRQHRWRVTVNFPAFVAGSDTIRDVSLLAVTTNTPTGQLGEILVPWGGRELPFPGDRRFEALPVTFINVVDNAPYNAFEIWQQYINGSNNNRASANPDDYFRDIIMELLDANDNVTKTWTLQGGWPQNLGQLELDMSAMDSYTQFTVDLRYFQAISDKSL
2146	fig|6666666.475224.peg.154	peg	2146_120805_122487	120805	122487	+	Phage portal (connector) protein (T4-like gp20)				atggcatacggcaaaggtttctttggtctgttcagcggcggcggtttagttgacgccaaagttgacacggacaaatatgtccagagtcaagaagagaagctgctttcaaaagcgactgttgtagctctggacgacgctcaggatggttcagtcatcctccagggcggggccaacacttacaattatgttggtgttgagagcgagctgcttaatgtcaaacagcttgttgaagaatatcagtccatggctcagcagcctgaaatccgcaaagcggtggacatcattattaacgacgttgtcacctgcgaagaagatgaaacgccggttactatcaatctcgataaagttgaaggcatcagtgaagatttgaaagaacaaatcacagaatgtttcaaagag…	MAYGKGFFGLFSGGGLVDAKVDTDKYVQSQEEKLLSKATVVALDDAQDGSVILQGGANTYNYVGVESELLNVKQLVEEYQSMAQQPEIRKAVDIIINDVVTCEEDETPVTINLDKVEGISEDLKEQITECFKEIMNLLDFDDTAYQKIRKWYVEGRQAYHVVTDPTKPGNGIQKLVMLDSRCIRPVYVVEKTMREGGIEAIEKVTLKYYYNPNYNRNQFTGQSGTSQNFQPSQQELVFDEESIVYVDSGEDPLANGVVPGLLNPAIRPLNNLVTVEDATVIYAITRAPEKRAFYLDVGTLGKKSAEEYMTMMMGKFKNRLAFDRSTGKITGNSHLMGIAEDYWLPRREGQNATEISTVGGGDQLGQMDHVNYFLEKLYSSLFIPKSRIQEEGSINIGGS…
2146	fig|6666666.475224.peg.155	peg	2146_122533_122697	122533	122697	+	putative uncharacterised protein				atgagcgcgatcgatattgttcgagccgtactggatggtgacatcgaaaatgccacggcagaatgtggtatggaacttgatgcccgccgtgaagaactgattgctcagggtacagaatacgttctgaattccctgggtgacgacctcagcactggcgcggaatag	MSAIDIVRAVLDGDIENATAECGMELDARREELIAQGTEYVLNSLGDDLSTGAE
2146	fig|6666666.475224.peg.156	peg	2146_122707_123015	122707	123015	+	hypothetical protein				atggaaatcaaagaaattgccacgttcgctgatttcctggcttcccgcatggacgaacagaaagtcatcgataaagtgaacgcaaaaggtaaacgccgtcgtcgtttaaaatgtgctcccggattcaaactttccgctgatggttctcgttgtgaagtcatgaacgccagcgagcgccgttcccgtaaactgggcaaccggaaagccatacgcgccaaaaaacgtatgggtctggggtatgaacgcaaagtcgagcggcgtaaaaagaaagccatgaagttccgtaaaatgatgggactgagtaagtaa	MEIKEIATFADFLASRMDEQKVIDKVNAKGKRRRRLKCAPGFKLSADGSRCEVMNASERRSRKLGNRKAIRAKKRMGLGYERKVERRKKKAMKFRKMMGLSK
2146	fig|6666666.475224.peg.157	peg	2146_123026_123691	123026	123691	+	Phage prohead assembly (scaffolding) protein (T4-like gp21)				atgaaactgttgcgtgagatcacggcgataggaaaggaacttcagatcggggaagcgcaaacttccactggtgggaaggccatgttcatcgaaggtccgtttgtgatgtgtaaccaggttaaccgcaacgggcgcaactacgaccttgaaaaagtcggtcgccctgctgtggaagcatatgaccgggaatatattcaagatcgtcgcgcaatcggtgaactcaagcatcctgactatccatttcctgatatcgaacatgccgccctcaaaaccgagtcactcgtgtggcaaggcaacaatgcaatcggacgggcgcgtattttaaacacccccaaaggtcagatcatccgtgctctggctgatgcggacttcaacctggctgtttctacacgtggcctg…	MKLLREITAIGKELQIGEAQTSTGGKAMFIEGPFVMCNQVNRNGRNYDLEKVGRPAVEAYDREYIQDRRAIGELKHPDYPFPDIEHAALKTESLVWQGNNAIGRARILNTPKGQIIRALADADFNLAVSTRGLGETVEVNGYDDVKPGFMLTAVDAVDRPSGQVCYVKAVHESVDWQLDESSGIWMPRDIKGQVVDNLVKHNSQLEDDFLRRLDLALKKLG
2146	fig|6666666.475224.peg.158	peg	2146_123737_124597	123737	124597	+	Phage prohead assembly (scaffolding) protein (T4-like gp22)				atgaaacctgaattacaaaaactgtttgagggcgttaatggcctcagcaccgagttcctggacaaagtgagcggtctgatggaggctaaagtcggcgaagcccgtcttcaggctatccaagagactgaacatgttgcccaccaggaacgtctgaaactcgtggaagcgcatcagcaagaaatcgctaacctgaaagaaactcatattcaggaagtggcgaccaaagttgatgcattcctgaatgccgtggctgaagaatgggcgaacaaaaatgctccggctattgacgctaccatcaaaaccgaagcggctgaaaaattcctgtctggtatggtcaacgtgctgaaagaagccaacgttgaatttactgtagacaccgacggccagatcgcagcgctg…	MKPELQKLFEGVNGLSTEFLDKVSGLMEAKVGEARLQAIQETEHVAHQERLKLVEAHQQEIANLKETHIQEVATKVDAFLNAVAEEWANKNAPAIDATIKTEAAEKFLSGMVNVLKEANVEFTVDTDGQIAALTHRLAEAEKRANVSESELKQIREQESIRQRNNVIDEICEGMVSTKKEVVVGLLEGIQFSDASSFGARVRTFRNLVEGNKDDFTDKVGKDNEGGKSSDDKEKDIKEGKKQKKEGDDPDDDDDDNDDDPDETDKELKESVSRQLEEYRRMRGLKG
2146	fig|6666666.475224.peg.159	peg	2146_124692_126014	124692	126014	+	Phage major capsid protein of Caudovirales (T4-like gp23)				atggctaagaaacttgttactgaacaaatgcgcgaaacgtggctgccggttctgaatgaagaatccaaatctattcagccgctgtctgccgaaaacgtcgcggttcgcctgctgcagaaccaggccgaatggaacgccaaaaacctgggcgaatccgaagcgccgggttctctgaacaccactgtcggtaaatggcaaccggttctgatcgatatggcaaaacgtctggcgccgatcaacatcgcgatggacttcttcggcgttcagccgctgtctggtccggacggtcagatcttcgcactgcgtgctcgccagggcgttgctgacggttctaatacccagcagtcccgtaaagaactgttcatgcaggaagccgattccggttattctggtgacggt…	MAKKLVTEQMRETWLPVLNEESKSIQPLSAENVAVRLLQNQAEWNAKNLGESEAPGSLNTTVGKWQPVLIDMAKRLAPINIAMDFFGVQPLSGPDGQIFALRARQGVADGSNTQQSRKELFMQEADSGYSGDGTVQAGDPSGFTQAEIEGSGAGTTTIGKGMPSTDAELLGSPSNPWARVGITVQKATVTAKSRGLYADYSHELRQDMMAIHGEDVDNILSDVMVTEIQAEMNREFIRTMNFSAVRFKKFGTNGIVDIAQDISGRWALEKWKFLTFILEVEANGIGVDTRRGKGNRVLCSPNVASALAMSGMLDYAPVLQENTKLAVDPTGQTFAGVLSNGMRVYIDPYAVAEYITLAYKGATALDAGIFFAPYVPLEMYRTQGESTFAPRMAFKTRYG…
2146	fig|6666666.475224.peg.160	peg	2146_126109_126354	126109	126354	+	hypothetical protein				atgagtgataaagaaatagacatccgtgctatagagatgcagggcgcgaagaaatacatcgtgggtcagattgaagaggcagaaaaggagttgaggcgtttaaaatctggtatattcagctcattaatgaattccaaatcgatatttgctgtagaggtctacaaagataccatgagtattttgctagacgacatcaacaagaagatcgctagacacattccgaattacggtgatgagcacctgtaa	MSDKEIDIRAIEMQGAKKYIVGQIEEAEKELRRLKSGIFSSLMNSKSIFAVEVYKDTMSILLDDINKKIARHIPNYGDEHL
2146	fig|6666666.475224.peg.161	peg	2146_126709_126915	126709	126915	+	conserved uncharacterised protein				atggcccgcgaagacaactctcaaatttctaccaacgccaactcaaccttcaatgagtggcacaacacccttgagcgtgtagcacgttctcaaggcggttcagcagctgacgccgatgcctggcgtgaagattatgacaatggcaagactccgcgccaggcatgggaagacgaatggggatgggaagatgcagacactaattcgtaa	MAREDNSQISTNANSTFNEWHNTLERVARSQGGSAADADAWREDYDNGKTPRQAWEDEWGWEDADTNS
2146	fig|6666666.475224.peg.162	peg	2146_126896_127126	126896	127126	+	putative uncharacterised protein				atgcagacactaattcgtaaaatctttctggataaaaaggggatggaatcaaaggtcgaaatcatcacgactcaaaaattgtttgagaaaggtgaaactcgatactatcttaatgtgttcctttaccttccagaatgcaacctgaaccgcgatattacccaaccggatggaactgtggtccgttgggaaatagccaaacaggaagatgttgaaaaagacatatcactttga	MQTLIRKIFLDKKGMESKVEIITTQKLFEKGETRYYLNVFLYLPECNLNRDITQPDGTVVRWEIAKQEDVEKDISL
2146	fig|6666666.475224.peg.163	peg	2146_127142_127579	127142	127579	+	hypothetical protein				atgacaaataaattcatttttctggacgttcgcggtaaacgattcttcaaaactgatctggacgaaaagacagaagggttccaggggcgtttatcatatttgttgccgacgggtgatatcgacacccaaagatatgtggcggatgtacgggatctcctggattgtggttgggttgaaattcctaacccccaggtgttgaccgtcaatctgtattacatgaaggaaagtgggaagtattattccaatggagaactccacctccttcgttctgaagtcactgccgatccagccaagagttggtacaatgctagagaaaccgtccggaagatggttgatgaaggcaatttgcctggcctggtatccggttctcgttacgatgtgttcatgtcctgtgaagag…	MTNKFIFLDVRGKRFFKTDLDEKTEGFQGRLSYLLPTGDIDTQRYVADVRDLLDCGWVEIPNPQVLTVNLYYMKESGKYYSNGELHLLRSEVTADPAKSWYNARETVRKMVDEGNLPGLVSGSRYDVFMSCEEHPCYVPTLVKVK
2146	fig|6666666.475224.peg.164	peg	2146_127576_128019	127576	128019	+	hypothetical protein				atgatgaaaactctcgaacaaattttagaaggtcataaaacaggaactttgtcggcggctttagacggtcgcgatttgacccgtctggcacagttcctgacagttgagcaaattgaaagcctgggactgtcttttaaatctcctgaaaaacgtgaatcccatgtcccggttgaattcaccaaagaaaatatcctgaaacaactggaaaaggacgtcgcctttgggtttgaaaaggctctgaatcgtcgtgggattagttctggccttatgtacgaagtcgtacaaatgtggaactgtatccttgaagaaggtctcgaagattttgattcgtatgcgatgtacggccttcctctgtttaaagcaactgctgtcaaatacgggtttgacaacccaatcggt…	MMKTLEQILEGHKTGTLSAALDGRDLTRLAQFLTVEQIESLGLSFKSPEKRESHVPVEFTKENILKQLEKDVAFGFEKALNRRGISSGLMYEVVQMWNCILEEGLEDFDSYAMYGLPLFKATAVKYGFDNPIGDDTGAEDHYEEQGY
2146	fig|6666666.475224.peg.165	peg	2146_128021_128257	128021	128257	+	putative uncharacterised protein				atgcgtatcaaaaagatcggatccagcccgctgactggtactatcttctacggcaccctggaaaccaaaaccagcatgtgggtaggggataaaattgatgtcaccgaagagtgtgtcgcagcgacggctgagcatatgcgtcacatcaagaaagactactgctacaagacacctgatggcaagtatctggtgttatctgctgaagtccacgatacccttccagatagattcaaataa	MRIKKIGSSPLTGTIFYGTLETKTSMWVGDKIDVTEECVAATAEHMRHIKKDYCYKTPDGKYLVLSAEVHDTLPDRFK
2146	fig|6666666.475224.peg.166	peg	2146_128359_128658	128359	128658	+	hypothetical protein				atgaacaatacaccaaccactaaaacccctctggccatcgatcctcggtttatcattgaagcaaaagcgaaccaaatgggtgcctatgtgtactccctgtatatcggtgaaacatacgttctctgtttgggtatagacggcgagaagaatgagcgcggtgtccgtgagcgttatatccccaaaaacgcagatgaagatgcgaccagatttgccaagcacatcctagaccgcattgcagcgggaaagccgtataaaaacggggaaaggggatgggcgacggatcttctgaataaagcgtaa	MNNTPTTKTPLAIDPRFIIEAKANQMGAYVYSLYIGETYVLCLGIDGEKNERGVRERYIPKNADEDATRFAKHILDRIAAGKPYKNGERGWATDLLNKA
2146	fig|6666666.475224.peg.167	peg	2146_128725_129006	128725	129006	+	hypothetical protein				atggcgaacaaaactatagcgacttctctaccacctttagattttagtttagaccaatcccataaacatcgtctgtctattcattatcgtatagcggcggcggtatcagatggcagggagacaattgagttttaccgacctgccacttcggccaaagctcatcgtgatacttatgttattttgcgtgaattacgtgaacttggggttgatattgaacccatgccgtgtagcaatcctttgcttaatctcttcgttttgagcaacttcgagaattggaaatga	MANKTIATSLPPLDFSLDQSHKHRLSIHYRIAAAVSDGRETIEFYRPATSAKAHRDTYVILRELRELGVDIEPMPCSNPLLNLFVLSNFENWK
2146	fig|6666666.475224.peg.168	peg	2146_129003_129446	129003	129446	+	hypothetical protein				atgaagaccattattctcataactggttcgcgttctattacagagcgtgacaaaatctttgaaaagttagacgaactttctcatacagattccgtttgtaatctgtatcttccgtgcgagaccctattgatcgctggggaggctgtcggcgtcgatacgatctgcaaagattgggctgaatccagaggggtgacttatcttgggatgcctatccccgatgaatacttcgctacatatgggaaaggggctggaaacaaacgcaaccaggacatgttagacaaggcgttggagttatcacagaaatacaaggcggagatactgcctctggctttctgggacggttcatcgactggtacacaggatatgatcaaacgaatcaacaaagcagggttgtattgt…	MKTIILITGSRSITERDKIFEKLDELSHTDSVCNLYLPCETLLIAGEAVGVDTICKDWAESRGVTYLGMPIPDEYFATYGKGAGNKRNQDMLDKALELSQKYKAEILPLAFWDGSSTGTQDMIKRINKAGLYCKVMLLGKPKTKRLL
2146	fig|6666666.475224.peg.169	peg	2146_129470_129637	129470	129637	+	hypothetical protein				atgatcatttttcaactgttttgctatttgttcactctgtacttcctggttgctgtcggttatgaaaccttccgtgatctagaatcgagccagtattcatccaaactggtttatgctaagaaatttgctgtccgcttctggagcaattttctgtatcgcctcccctga	MIIFQLFCYLFTLYFLVAVGYETFRDLESSQYSSKLVYAKKFAVRFWSNFLYRLP
2146	fig|6666666.475224.peg.170	peg	2146_129672_130400	129672	130400	+	hypothetical protein				atgaatgcacaaatctacgacgcactagagcaaggcaacgcctttaccaacccgctcccgggattctctgctacttctcagacgttaatcaccagtggccaacaaagtatagcaggtattacaagcatcccggatacgtccgttcaggcggcgataaccgctggtggtttgactcctgctaaactcaatacaatgaacaccatgtacgggactgccaacaccgggatcggcactctgaattcttatggggaccagaccgttaatgaggcatacaataggatcggaacttcagtatcctataaatccggtctcaaaagtattgaacgagaacccaccaactgcgatttgattaacaacgcattcggtgttgtacagacactcggtcgtcaatggttgact…	MNAQIYDALEQGNAFTNPLPGFSATSQTLITSGQQSIAGITSIPDTSVQAAITAGGLTPAKLNTMNTMYGTANTGIGTLNSYGDQTVNEAYNRIGTSVSYKSGLKSIEREPTNCDLINNAFGVVQTLGRQWLTAMEDALSPITDKIQELYDLAKQGAAAGLAKIQALASQVNGLINDAVAKVNGVIQNITDGIAAELAHIEDMVKKCLNFSFANVLGEWAKDLCAGGVINNIGSNDLKNALK
2146	fig|6666666.475224.peg.171	peg	2146_131060_130401	131060	130401	-	putative uncharacterised protein				gtgtccctgatgcgcggaatcagaagatggattgtggtgatttttatggtacttgtattgacaagttgccgtattttcgtcacgcccatcatttccgttagtgacctctgggatactgatgtccgtgttgtaccagtaaccatttcaacagacagtaacaaatgtgaaaaatccatgctggatgaggccactattttgtttcaaagttttcaaaatctccagcctgtcggttgttttgatgacaataaagacactttgcgaccatactggaaaaccaccatccctcttttacgcaaaggggaagaaggcaaaattccttacttgtcagcaagtatttattactcacagaacaacagcatcatcatcacattcaacccatctttctacgacaaaataaaa…	MSLMRGIRRWIVVIFMVLVLTSCRIFVTPIISVSDLWDTDVRVVPVTISTDSNKCEKSMLDEATILFQSFQNLQPVGCFDDNKDTLRPYWKTTIPLLRKGEEGKIPYLSASIYYSQNNSIIITFNPSFYDKIKRYTMKQGVNLTTDITVTFQITNNTKKPVRIATQGVFVNNEAVGNEMNVFEIKPGGKIWIRLSDVGVNSLLVEGIEPVGVLPARTVP
2146	fig|6666666.475224.peg.172	peg	2146_131090_131590	131090	131590	+	Phage tail completion protein			isu;Phage_tail_proteins_2	atgtctacttcagtccaatttaaacatgacaacccaaattatgcagcatccgataagtggcgcttaactatcggtgacctgatattgttatcccgctctgtacacgattttagcataccaggcgtgtattccgagggcatcgatgggccttcgcccggttcagtgctcaacacgatcccttctgaacgtttaacatatgatcccatcgtatttacgttcgttatcgatgaggattgggtaaactgggaaaccatctacaactggatagccagtaacgccgccgctgatatggctgttagcaaagatatcaccatagaattactcaacaacatgaaccgtcctgttggcctgcaacttctgttggaagaagcccgaccgactgcattagacaacgttctt…	MSTSVQFKHDNPNYAASDKWRLTIGDLILLSRSVHDFSIPGVYSEGIDGPSPGSVLNTIPSERLTYDPIVFTFVIDEDWVNWETIYNWIASNAAADMAVSKDITIELLNNMNRPVGLQLLLEEARPTALDNVLVDVDASVPQLVTTVTFKYLKLTPTRVVREIDKE
2146	fig|6666666.475224.peg.173	peg	2146_131630_132091	131630	132091	+	putative DNA repair/recombination protein UvsY				atggaagttaacaacactcaatatcaaacgatgtctatagaggacatcatggctgaactggatccactgattacggttgatccggctgatcgtaatttagatcagatttcgttgaagatcggacgttcctttatgacagtgcagcggcattacattcgtgaagggcgttatctggaatatctgactgggcggtttaaacagattgatgtttatctgcggagatattatgccggggaattgcctgcacaatcgtatcgcgaacgccctctcaacaacaaaccactgaaaactgatctgcctctatgggtccaggctgatgacatgtatgttgaaatgtccgggctgctccaagagcagagagcaaaagtgaaattcatcgaaagttgtttggatcgtttg…	MEVNNTQYQTMSIEDIMAELDPLITVDPADRNLDQISLKIGRSFMTVQRHYIREGRYLEYLTGRFKQIDVYLRRYYAGELPAQSYRERPLNNKPLKTDLPLWVQADDMYVEMSGLLQEQRAKVKFIESCLDRLNKLGYEVKNAIDWRKYMDGM
2146	fig|6666666.475224.peg.174	peg	2146_132094_132840	132094	132840	+	conserved uncharacterised protein				atgagccgactccaggcactcaagaagatcaacaatattgaggaacgtcaatatacatttcagcagtacgaattaccgtacaaggagctgacttgtgtaacgaacgagaatggacgccattacgtttccccaacaggggtgaagttaacctctgtaacaacaatgttggggcgtaccagtgaccatacatggttggatgcctgggtcgaaaggcttggagttgaacaagcagcaattgaaacacaaagatgcgctgataggggagaggcagtgcatcttgcttgtgagttatatctgaagaatgcgccaatgaaagatgttgtggccgccgccgggcaatatttattcatgttcatgcaattgtttccctatctgaatcgcatgacaaagatatatgcc…	MSRLQALKKINNIEERQYTFQQYELPYKELTCVTNENGRHYVSPTGVKLTSVTTMLGRTSDHTWLDAWVERLGVEQAAIETQRCADRGEAVHLACELYLKNAPMKDVVAAAGQYLFMFMQLFPYLNRMTKIYAQEIPLYSEVLGLAGRVDLIGVYNGTPAIIDFKTSNTLKTRDMIEDYSIQLCLYSVMFQQMFNVKIERLINIISNENGLLPTVIEFDRKDILPKMFERVRLYHRMDKEQNGIWADR
2146	fig|6666666.475224.peg.175	peg	2146_132868_134385	132868	134385	+	putative type III restriction enzyme				atggccgacatttctgtgaccaaagtgaacgaagtccgtatgcgtgtgcatgctgacgctgggatctatgaagaactgaatgattatttcaaatttgaagatcccaactttcagcctaatcctttcagcaaatgggatggcgtcgtccgcttatttaccaaatcttccggcctgatcgacatcggtcttctgtttgaactcttcaaattttgtaagaccaacggttattcacttgacgtggatcctgcattgaaatatatccaggacatccctgataatgaaatccatgatttctgtaataatttgaaaacacaaattcgcacagaatctggggaatacattgatgctgaagttcggcagtatcaattcgattccatcgccactgccatgaggcaatct…	MADISVTKVNEVRMRVHADAGIYEELNDYFKFEDPNFQPNPFSKWDGVVRLFTKSSGLIDIGLLFELFKFCKTNGYSLDVDPALKYIQDIPDNEIHDFCNNLKTQIRTESGEYIDAEVRQYQFDSIATAMRQSRCVLELATSGGKSFILYVMARYYRERREALESNLRTLIVVPSVHLVRQLYENFEEYSHGQSWNPFYQVQTICEGATRNIDKPITISTWQGIQDQPKDWFHQFGDIIVDEVHTSKSDKLSYILNNCINADQRLGVTGTLANTKVAGLQVVSHFGAYHKIITARELISMGYAADIKIRMIELKHRLADAIDMHGADYQKEMEYLISNEVRNRLIAKMALTLKGNVAIMFERIDAHMMIVYDILKEIKPNVFVINGEVKSADRMQIQRA…
2146	fig|6666666.475224.peg.176	peg	2146_134753_134370	134753	134370	-	hypothetical protein				atgaaacaactagtagcaatctatgccgtagggtacagccacggagatatggcaagccggaaattgggtagtgagacaacaaccactactcttttgaaagttttagttgatgaaacgaaatcagacactgccaaggaagtcccattctcattcctgtcgggtaataccaagccagggctttatgttgcgatcgtcaatatgagcaacttcggcgaattaaaagtgttccctctcatcaacaaaaatcaggcggtcatcaacaaaaccatcaagccggaactgttacaacgttgttgtgatagtatcgacgcattcctgggtttggttgacgacagtgaagaaggcgagccaacgcccgcctatgtggatcaagaccccaaataa	MKQLVAIYAVGYSHGDMASRKLGSETTTTTLLKVLVDETKSDTAKEVPFSFLSGNTKPGLYVAIVNMSNFGELKVFPLINKNQAVINKTIKPELLQRCCDSIDAFLGLVDDSEEGEPTPAYVDQDPK
2146	fig|6666666.475224.peg.177	peg	2146_135077_135745	135077	135745	+	Sliding clamp DNA polymerase accessory protein, phage associated			isu;Phage_replication	atgcaagaaattactctgtcggaacgcactctgcaacttctggctaactttgaaaccatctgtccgtctatcgtcctgacacctggcaaaaagctgcgtactgtgaatgacgcatcgacggttatcgccatcgccgatattgacgaagactttccgttcgaattcccgatcctcgatctaaccaagctgctggccatccagcgcctgccgagtttcaagagcggcaagatcgaaatgtacgaagaccacgtgctgctcaaaggcgaaaattctcaactgcaattctggcgctcggccaaagaactgacgactgttccggctgataccattgatctgccgtcggttgatttcgaagcaactgtgtcgccggaaaaaatgaaagagctgatccgcgcgtgt…	MQEITLSERTLQLLANFETICPSIVLTPGKKLRTVNDASTVIAIADIDEDFPFEFPILDLTKLLAIQRLPSFKSGKIEMYEDHVLLKGENSQLQFWRSAKELTTVPADTIDLPSVDFEATVSPEKMKELIRACSTLGHKTVRMVASGGKTRLVGTTPAIDNSNDYTVELGETALGDFSMPIDVVNLKMIEGNYTIRACTEMQLVNFQSVDGTINYYVGMQLE
2146	fig|6666666.475224.peg.178	peg	2146_135831_136829	135831	136829	+	Replication factor C small subunit / Phage DNA polymerase clamp loader subunit			icw(1);Phage_replication	atgtctaatatcacaatcgttggtgaccaatacgcatgggaaaacaaatatcgtccggataatctggatgagatcgtactccctcgggacgtccgtgccaagatccatggctatatcactggtggtaatggcaacatcccgtcaatgctgttctactcaccgaaaccgggtactggtaagaccacgactgctctggcggtttgtaatgaaatcggctgcgtcaagccgctgatgatcaacgcatccctggacaacaacatcgacaccatccgcgacaaagttatccagtattcgactggcgtcagcgtatatggcggacggaaagtcgttatcctggatgaagccgagcgcctgtctatggccgcccaggaatcgttgaaaggtattatcgagaaggtg…	MSNITIVGDQYAWENKYRPDNLDEIVLPRDVRAKIHGYITGGNGNIPSMLFYSPKPGTGKTTTALAVCNEIGCVKPLMINASLDNNIDTIRDKVIQYSTGVSVYGGRKVVILDEAERLSMAAQESLKGIIEKVSKNCSFILTTNSKSRLNEPLVSRCREIDFIWTDKEAHEVQLQFMRRCAEILAAENVEVDLKVLGRIIPQFFPDNRKIMGILQDNASTYGKIDERALAVVNAGGMRQLVEEMKANNWAGVRQWVTDNQNYIGDDFYSRFFQFCVPQDKSKPRLLADNSSIVDMVALCGQAQIEHRQAGDVWLHAVYFLTNVMITMSNKWS
2146	fig|6666666.475224.peg.179	peg	2146_136833_137255	136833	137255	+	clamp holder for DNA polymerase				atggctggtccttctttatttgatttcttaggcgccataaacaacactaaagaaaatttgttagagacagatgatcccgatgttttgaaggcgtttgacccgttcatgattcgaagaggtttagctcagagcgaagacacgctggtgattgcacaaaaaatgaacttgttgcacaagtgcagtccttggatgcagtggaacatggcgttccataccgttcaggccaggaaacgatatccaaaatgggccaaaaaaggtccgctcgaccctgatattcagatgttgtctgaatattattacattagccatgaaaaggcatcagagtatctcaaatttcttccaaaagaagcactggccgagatcaggaagaaagttgagttgtctagcagcaacgagaaa…	MAGPSLFDFLGAINNTKENLLETDDPDVLKAFDPFMIRRGLAQSEDTLVIAQKMNLLHKCSPWMQWNMAFHTVQARKRYPKWAKKGPLDPDIQMLSEYYYISHEKASEYLKFLPKEALAEIRKKVELSSSNEKAKPRKAK
2146	fig|6666666.475224.peg.180	peg	2146_137284_137748	137284	137748	+	putative uncharacterised protein				atggcgcgcaatacgctcgacatcttaaaactgactgcggtcgacgatgaggccagcatcgtcgattgtatggtcgaagttgaattgaaccaagataaaccggggattttcctgggtatcaaggaaacactgagccgaatcggggttaatactcgccaagagcctgaaaccctgtatcaaacctgccatatcctccacaaatctggcaagtattttatcgtccatttcaagcatctgtttatgctggatggacattacaacggctttcagcgtgaagatgtcctgcgtatgaatcgcatcattcgtcttctggagcagtggaagatgattaaggttctgcatccggaacaagtaaccgaatgcgccgacatgtcccgtatcaaagttgtgaaacacgat…	MARNTLDILKLTAVDDEASIVDCMVEVELNQDKPGIFLGIKETLSRIGVNTRQEPETLYQTCHILHKSGKYFIVHFKHLFMLDGHYNGFQREDVLRMNRIIRLLEQWKMIKVLHPEQVTECADMSRIKVVKHDQIADWKLVPKYIIRPSRAKSE
2146	fig|6666666.475224.peg.181	peg	2146_137765_138631	137765	138631	+	conserved uncharacterised protein				atgacaactacatttagtaagaacgtgagactgaatctggcttttggtaatgctaaaggggacgtaaccgcccccgactttagcaaaattcgcaatcaggcgaaactcgttctggaagaaacccgcgaactcctggaagcggcgtatttcgatcatcaagtagttctgacattggaacttaatcctcgggaaagtgaaacgccaaccactactgaagatctgatgaaagccatcatggatgcgcagggtgatatcaccacagtcaacgacggcgtagctcatattgccggtttcgacggtgatgaatgcctgcagcgtgtctttgcttccaacatgagcaagttcatccgttctgaagatgaagtcggcccggcgctggactactactattcccgtggt…	MTTTFSKNVRLNLAFGNAKGDVTAPDFSKIRNQAKLVLEETRELLEAAYFDHQVVLTLELNPRESETPTTTEDLMKAIMDAQGDITTVNDGVAHIAGFDGDECLQRVFASNMSKFIRSEDEVGPALDYYYSRGFPEGQLRVEGEFPQACIKVNETVMWKGKEYPAGKFLKNMAVFQEPDFSDMLTDSPKQQIKTIISSQTAQKGQVFVDHKTGVAYFHTDDLGTFLGEQTVGAIENVVDMQGQTESYVPVYQVGGEKYPALAGVWAANVRMFVYSPYNPEVTQLTRID
2146	fig|6666666.475224.peg.182	peg	2146_138703_139932	138703	139932	+	conserved uncharacterised protein				atgaaagacaaacagtcagacatccaatattgcggtgtccgtgaagacaaaatcaaaacggctgatcctgtcctcagcccctttcatcgtaagctgtcgtatgaatggatgagcgaacgttacaaaatccacgtgagaaaggacgtccagcgccttccttctccctggacagaaaatgagatactacggcaggtcaagttctgtaacgtccggagagagcacgacaggcagtctcagcacctcatccggaatatcgtcgagaacaacaacctgtctctggccgacaagatgttcaactgccttctgttccgtatgtttaacatgtgggatcccatccagcatgttctggaaggcccggtttctatcaacgatttccgcaatatcaatttggaccgaact…	MKDKQSDIQYCGVREDKIKTADPVLSPFHRKLSYEWMSERYKIHVRKDVQRLPSPWTENEILRQVKFCNVRREHDRQSQHLIRNIVENNNLSLADKMFNCLLFRMFNMWDPIQHVLEGPVSINDFRNINLDRTRERFADFDKKGGVTFTNAFNTGGLKQCLAFPELAVTGKPASPSKMMVKVFENEGPMKFYVGEMKYKDAKSLAEDNPGTVTIEGWEPHMGMRVVRFLKSFVTHNPHFFHSLLGFNSPLSVYEELRDKVEGLGPFLAYQVWVDFTYNPDYPFSENHFTIAGPGCRAGIDLLFLDKDGMTHEECIFWLRDNQDQVYGQYGYVREQFWSAEAPEDQCMNVMQLENMFCELSKYTRCVEAVMRGEKPRGKVGYDGSGDYKKRCDEVVLNRS…
2146	fig|6666666.475224.peg.183	peg	2146_139929_140153	139929	140153	+	hypothetical protein				atgagttggaaattattcaagttacgcaaagccacagatgaattcctactggaagctcgtatgcaaggtcgtcttgtgtacacgccttatccaggaaccacgcgcttttgcaatacgttaagaaaacagaattctgtttctggccctagaagattgatgaaccagggaatgttggcatacaactctggggatacccggccttgtgacggtgggaagataatctga	MSWKLFKLRKATDEFLLEARMQGRLVYTPYPGTTRFCNTLRKQNSVSGPRRLMNQGMLAYNSGDTRPCDGGKII
2146	fig|6666666.475224.peg.184	peg	2146_140270_142306	140270	142306	+	conserved uncharacterised protein				atgtcagattttaaacccttcgcagttgctgtaaagaatcaaatcaccgcgatgtccagcaatggcctgtacatgacttcggttgacaaagacgccctgtgggatctgtatctgtcatctttcccggaaggcacgaacaatatctaccgtgagcgcactgagcacgattgcacttgctgcaagcaattcatccgtaacatcggcggcgtcgtatcgattgacgctgatctgaacctggttactgtgtgggacagcgtcaatctgggcaacgaatacgacgtggtggcggcagcgctggccaaatatgtcaagcagcacaacatcgtcggcgtctacttcaacgattctgctaaggtgggcgtagaaagcaaccacgaaatgggcgctggcggtgtagtg…	MSDFKPFAVAVKNQITAMSSNGLYMTSVDKDALWDLYLSSFPEGTNNIYRERTEHDCTCCKQFIRNIGGVVSIDADLNLVTVWDSVNLGNEYDVVAAALAKYVKQHNIVGVYFNDSAKVGVESNHEMGAGGVVRTYNHFHAVLNNKFVLRGEDIASTKGEISQSIEVFERSMRELTMESAEIVLELIDQNSLYRGEEHRSAVQSFVQSKTEYMKIRSDLKQLWAWRTGWLSKNHKPFGIRNTVIGTLLTDLSDGVEMEKAVKSFEAKVAPTNYRRPTALVTKGMIEKAQKTVAELGLTESLGRRYAKYEDLTINNVLFADIDARKAMDPFDQLAQEVKVTEKSLGKIEEISVDDFIKNVIPKARSMEVMFEGRHTANLMSLVAPETQGAPGLFKWGNNF…
2146	fig|6666666.475224.peg.185	peg	2146_142343_142714	142343	142714	+	hypothetical protein				atgtttgataaagcaacccgtctgaaactgcgtttcaactccaacaaaggccagctgtccgttgagcaggtgtgggatctgagcctgactgctctgaacgaaatggcgaaaggtctgagccgcgaactgaaagccgctgcggtcgacgatgaagatttcatcggcaacaatacatccgtcgactctcagctgcaactgcgctttgacatcgtcaaaagcatcatcagcaccaagctgaaagagcgcgatgacagcctgtctgctgcagaaaaacgtgagcacaaccaggccatcctggaactcatcaagaagaaacagcaggaagagctggcgggtaaatctgttgaagaactgcaagccctgctgaaataa	MFDKATRLKLRFNSNKGQLSVEQVWDLSLTALNEMAKGLSRELKAAAVDDEDFIGNNTSVDSQLQLRFDIVKSIISTKLKERDDSLSAAEKREHNQAILELIKKKQQEELAGKSVEELQALLK
2146	fig|6666666.475224.peg.186	peg	2146_142813_143667	142813	143667	+	Ribose-phosphate pyrophosphokinase (EC 2.7.6.1)			isu;De_Novo_Purine_Biosynthesis	atgtttcgtttgagattgaacgaccaagatgtgttctacaaacacttcacctttccaggcggtgaagaacatatcaagattcaaaaggcgggtatccctgttggtaaaatccagacagtggtaattgacgcccacattaaatcgtcagcagacttcattgagctggcacttttggtgaatgccgtgcgcggcctgggtaatgtcgaccgactgacaacatttcatgcttatatcccttattttccatatgcccgtcaggatcgtcattgcgactttggtgaacctctttcggtgaagtgggcagcagagttcatcaatagtatgaactttgaccgtgtggcgatcaaagaccctcacagccatgttgtgtcttctctgatcaacaacgtccatgttgtc…	MFRLRLNDQDVFYKHFTFPGGEEHIKIQKAGIPVGKIQTVVIDAHIKSSADFIELALLVNAVRGLGNVDRLTTFHAYIPYFPYARQDRHCDFGEPLSVKWAAEFINSMNFDRVAIKDPHSHVVSSLINNVHVVPQDYIARQYLGWFIRGNNAVLVAPDGGAAKKTETLSLSLDGVPVVYGHKNRDTKTGEIIGVSITNPELIRDRYLVVVDDICDGGRTFVELGKELQKHEPKHMTLFVTHGIFSKGLSVFDGIYDAVYADTVWWENITADGIPFKTENTGRVK
2146	fig|6666666.475224.peg.187	peg	2146_143664_145316	143664	145316	+	Nicotinamide phosphoribosyltransferase (EC 2.4.2.12)				atgagcatgcgccacttagatccaatccatgcaatcgacttctacaaatcagggcacatctatcaattccctgaaggtagcgagctggtgttctccaacggaactccacgctccaacaaactgttcaactcccacctgccgaagaacggcgtggtggtctggggtatccagggcttcatgacctggttccacgaactgtttgatgaagcgttcttccagcgcccaaaggccaaggtgctgaagaagtatgcccgtcgaatgaacaaagttctcggaccaggccgcgttgggacagagcatatcgaagccctgcacgacctcggctacctgcctatcgaagtccgtgcgctacccgaaggcaccatgtgcccgtatggtgttccggtatatgtgatgttc…	MSMRHLDPIHAIDFYKSGHIYQFPEGSELVFSNGTPRSNKLFNSHLPKNGVVVWGIQGFMTWFHELFDEAFFQRPKAKVLKKYARRMNKVLGPGRVGTEHIEALHDLGYLPIEVRALPEGTMCPYGVPVYVMFNTLPEFYWLTNYLETVFSSEIWKPMTNATIALHYKALMVKAAIATGVSPDHWFIDYQGHDFSFRGMSGWHDAASSGSGHLVFFKGTDTNPALDFVEEYYGADIDEDYVVAGSVAATEHAVMCMGTKDGEFETFRRLVQDVYPDGIVSIVSDAWDYWQVIDDYLPRLKDIIMARNGKVVIRPDSGDPVHIVGGYRVEEFCNEQDFYDNDPREETEVIYLKEENRYHILEQYQFNQIGEEISRSEAVGSIQRLWEIFGGTQTETGHFL…
2146	fig|6666666.475224.peg.188	peg	2146_145403_145780	145403	145780	+	hypothetical protein				atgaaaccagttatttgtgattattgtgggaaggcggctatactcgttagtggcgacgcaatatacccccaccgcccggatctaaaccaccttcaattctgggtttgtgagccttgcgatgcaagagtcggttgccatcctaacacagggggcattcccctcgggagcctggctaatgccgaattgcgcaaagcgagaaacaaggcgcataactgttttgatcctctttggagagaaggtggtatgagccgtggacaggcataccaatggctgtctgaacaactcggtctaccgaagtccaaatgtcatataggacaattcgatatctacacgtgcacaaaagtcgttggcttgtgcagcctttattggagtatgtaa	MKPVICDYCGKAAILVSGDAIYPHRPDLNHLQFWVCEPCDARVGCHPNTGGIPLGSLANAELRKARNKAHNCFDPLWREGGMSRGQAYQWLSEQLGLPKSKCHIGQFDIYTCTKVVGLCSLYWSM
2146	fig|6666666.475224.peg.189	peg	2146_145781_146533	145781	146533	+	conserved uncharacterised protein				atgtctaaccgaactggtattaaactcaatccggaaatccttaaatcccatatcgcagaagttatctatgaagaccgcgaagtgggagggcatcgtgttatcacttgccatttgaaaatggataacggatttgtcgtttggggaaaggatagctcaacatcgattgatcccaaaaatttcgatgaagaattgggcaagaaattggcatacgataagactttctctcaattgtgggaactggaagcgtatcgggctatggttgtccaacatttcattggtaagacaactgaagaaccgtttataaaacttgaagattatattgaagaaagtaagacaatgcaagtatccggttgggactatcggaatggtgtagccaccgcatattctattagatcaatt…	MSNRTGIKLNPEILKSHIAEVIYEDREVGGHRVITCHLKMDNGFVVWGKDSSTSIDPKNFDEELGKKLAYDKTFSQLWELEAYRAMVVQHFIGKTTEEPFIKLEDYIEESKTMQVSGWDYRNGVATAYSIRSIKRSKFGLLDYISICLYKTDNKKHDDIHNSKEIQKAKDFIRSYMNHTEINSQFVIHIAKLCWAARSAVVDTTPSWEDSKETDRQDMCETVKKLLLSPSDYQPKDNLLKLFWAIVSQFR
2146	fig|6666666.475224.peg.190	peg	2146_146598_146954	146598	146954	+	hypothetical protein				atgtcagtcaaaatgaaaggtgccgagtttaaagcatactacgatgacccacagtattgggttcaggatgcttggcatgattatcacaacataaaggttaatggcaaatatattgaagatattgaaactgagaatattcccgacgacgctgatgtggttattgagtcggggatagtttatattcccatcagaagtgaatccggttatgaagaaaaagaagtccaactggtcactcacttcaagaactggcgcaaacagcaaaaattttctactattgttgtggtagttgaaaaagacaaagctgaagaaattatagcctcaattaaaacaatacctggcgtcaataccgtcaagtga	MSVKMKGAEFKAYYDDPQYWVQDAWHDYHNIKVNGKYIEDIETENIPDDADVVIESGIVYIPIRSESGYEEKEVQLVTHFKNWRKQQKFSTIVVVVEKDKAEEIIASIKTIPGVNTVK
2146	fig|6666666.475224.peg.191	peg	2146_146962_147105	146962	147105	+	hypothetical protein				atggattcctgtctattagatcccgagaacgttcttgcggttgaaattgaaaacaacaagccgttcattttgaaaatgttggagaaggataataatcctgaaaccaatcctaaactatcccaaaaggggaataacgatgattga	MDSCLLDPENVLAVEIENNKPFILKMLEKDNNPETNPKLSQKGNNDD
2146	fig|6666666.475224.peg.192	peg	2146_147098_149296	147098	149296	+	putative uncharacterised protein				atgattgaatcattagaatttaagaatgccacacagacggtcgctccttccaatcacgtcatcgtcgttgacatttcttattccatgtgctatgcgctgccgaaactacgccagcacctgaaagaaaacctgccctccctggttaagccggaagacaccatcagtattctgtacttctcttctcgtggcgacttcggtactgtgttcgccgggcgccaggtcaccaatgcatctgacctgagtgagctgggtaaactgatcgatcgcttcctgcaaccgacgggctgcaccgggtttgttgagccgctcaagctggctatcgaaaccgccaacgatctgaaaaagtccggcgtcatcaattccctggtgttcatgaccgacggctatgacaactgctgg…	MIESLEFKNATQTVAPSNHVIVVDISYSMCYALPKLRQHLKENLPSLVKPEDTISILYFSSRGDFGTVFAGRQVTNASDLSELGKLIDRFLQPTGCTGFVEPLKLAIETANDLKKSGVINSLVFMTDGYDNCWRSSEILAVAEQLPKAYDNITLIEYGWNCNRELLQKMAECSGATHVFAEGQEEYQTELETAMVSVAPRVRVDFSVIYSYAVYIENGIPTILAAQSDEDHPINYVNIPESVSKLWVVDPDMIDQLDNLADVEAAYVLALFGVHTMDADLVWAALKKSGDVRFIKQYTNCFTKQDYSNIKTDITAAIVDPALRGVDGIDYNLVPPEDATTVVDVLTYLAGADAQLVVDHPLFSYKRIGRGTVQKADDTEDKLAAEIAEAKSKEERKALA…
2146	fig|6666666.475224.peg.193	peg	2146_149341_149664	149341	149664	+	acyl carrier protein				atgtctaagaatgtgtcttatatcgatgtcatgcgcttccttgtccagtatgcaagtgacaatctgaatatggaattatggcgtgagaagaaacactccgtaacaatacaatccgcgattgaaaaaatcgaagaccagctggataccctggctcctctgcgcgtcaaagaacatctgggtggcgatgaacttgacgcgatagaaatcatcatggacctggaagaagaatatgatgtagagatcacggatcattggatcgggtctcacaaagacgacccaaccctgggtgaattggctgaacacgtggttcacttattaaaataa	MSKNVSYIDVMRFLVQYASDNLNMELWREKKHSVTIQSAIEKIEDQLDTLAPLRVKEHLGGDELDAIEIIMDLEEEYDVEITDHWIGSHKDDPTLGELAEHVVHLLK
2146	fig|6666666.475224.peg.194	peg	2146_149758_150003	149758	150003	+	hypothetical protein				atggaacaactactccccgaatccgtatgcacatacgttcgccttgcaagtgaaggtgacgaaatggccacccaactcactgacctcatcctgagctacggtatcaagaaagtcaaccaagttgataactctggtgtgaaaggcgactatatcgttctgaatcatcgcggtctgaagaccaatccggtatttttcgtcggcgttcataagaaagatggccaggaagtcgtggagatcgtatcgtga	MEQLLPESVCTYVRLASEGDEMATQLTDLILSYGIKKVNQVDNSGVKGDYIVLNHRGLKTNPVFFVGVHKKDGQEVVEIVS
2146	fig|6666666.475224.peg.195	peg	2146_150000_150236	150000	150236	+	conserved uncharacterised protein				gtgagtaataagaaagtcgaaaccacggttgaaattgaaaagaattggggtttccttcgtgctaaaggtttccgccgtgtgtatgctgcgaaggaagtctatgtccagcgtaaggacgtcatcattagcaagaaaggtaagtcctgggtggcagaagaagtagacgaagacggcatcgtaggcaagattaaggccaaggccgaaatcctctttgctcttctgaagcaaattaactaa	MSNKKVETTVEIEKNWGFLRAKGFRRVYAAKEVYVQRKDVIISKKGKSWVAEEVDEDGIVGKIKAKAEILFALLKQIN
2146	fig|6666666.475224.peg.196	peg	2146_150291_150659	150291	150659	+	hypothetical protein				atgaaaaaattaatcattgctttggctctggccagcctttccttcgctgcacaagccgatcgtgtcatcaagggtataaccactgatggcaaatactccttccaggcatttggttctgaccttgtcctttataatggtgcgaagcggctatatcattgccgttacgacacgaccactcgtgggattgataaagcagaagatccatatgtgttggacatataccaatgtgggaataaaactctgggagtcaaaaccttcgggaatatcgaagaaggcggttgggtaacggtaatcgcgaccgtcaacaataaacctgtcactgtatttcaaaagccatttgccatattcaccggggcgaattcattatga	MKKLIIALALASLSFAAQADRVIKGITTDGKYSFQAFGSDLVLYNGAKRLYHCRYDTTTRGIDKAEDPYVLDIYQCGNKTLGVKTFGNIEEGGWVTVIATVNNKPVTVFQKPFAIFTGANSL
2146	fig|6666666.475224.peg.197	peg	2146_150656_150964	150656	150964	+	hypothetical protein				atgacagattttatagtccctccagcctcattccttcgcgtgaaaaatgaagtgaaggaaatcacgggctgtactcacaaagaatctacgactatcaccatgatgctggaagcaaaaatgttggtagattcagaggatacaaaagcagccttgaattctctgttagctcttattatccgagcgtaccgaatccctgctatttcagatgcagacgatttggttaaactcctcaacactgaagggaaagaatatgattccctccgcatctttatgaccggtatacaagaaggtggttggtatgattattaa	MTDFIVPPASFLRVKNEVKEITGCTHKESTTITMMLEAKMLVDSEDTKAALNSLLALIIRAYRIPAISDADDLVKLLNTEGKEYDSLRIFMTGIQEGGWYDY
2146	fig|6666666.475224.peg.198	peg	2146_150954_151130	150954	151130	+	hypothetical protein				atgattattaattgggaattagtcggcttggtgctcagcattattttcggtgtggtgggtgtagtttgggtaatcattggcatctggttctatcgtttattcaccacatatgagaaacgtgatgctgaacgcatgaaacgccaagaacaaatccgcaaccgccgggagaactggtga	MIINWELVGLVLSIIFGVVGVVWVIIGIWFYRLFTTYEKRDAERMKRQEQIRNRRENW
2146	fig|6666666.475224.peg.199	peg	2146_151130_151222	151130	151222	+	hypothetical protein				atggggttcccgattatcacaataattgggtatgggattattgggttagtcctattcttgatcattatctgtttcactaaacatatgcgctaa	MGFPIITIIGYGIIGLVLFLIIICFTKHMR
2146	fig|6666666.475224.peg.200	peg	2146_151255_151704	151255	151704	+	hypothetical protein				atgttcttgacttcctttatcgactggttgaatatcatcaacggcctgaggattcctgtagggaacctcgggctttctcgttcttctatgccacaaattgacgctgataaacagcaagacttccatgattatctggaggcgaatggtgtgaccatagatgcatctcaagtcccgatccggacattgcggctgactcagaacgagatcaacaaaatgaaggtctggaagatcatgaagcagatcaggaacaagaagccgatgggccgggtttgggtgtcttcagataattacgttgtggatggttcccatcggtttgtggccgctctgaatatggacggcaagcaacgaatgaaggtttacaaagtagatttgcctgctatggagtttgtcaaattagct…	MFLTSFIDWLNIINGLRIPVGNLGLSRSSMPQIDADKQQDFHDYLEANGVTIDASQVPIRTLRLTQNEINKMKVWKIMKQIRNKKPMGRVWVSSDNYVVDGSHRFVAALNMDGKQRMKVYKVDLPAMEFVKLARQFNGVRYRTVSDARF
2146	fig|6666666.475224.peg.201	peg	2146_151783_152469	151783	152469	+	putative uncharacterised protein				atgaaacgtttaatccttggggtgctgctggctggactggcgctccccgccgctgccaaactgaactccgcaggtgagaaactgtgggaagatctttcttactgtgctggatggtctcaggctgtcgccatagacaagactggttctatcgagaacttttctgaattgtggaacaccgggaacgtgactgacgctgttgtcaacgccggaattgaatttaatcgatacaaacaaggagcctataatctcaaaggctacctgaatgacgataaattcaacaaaggtgggatggatgcttcagatttgatcatgactgggcgtatgggcacagcagggcggattcaggttagacaatgccgttcgctccccatcccggcgcttcagaaaggtgtcaacatc…	MKRLILGVLLAGLALPAAAKLNSAGEKLWEDLSYCAGWSQAVAIDKTGSIENFSELWNTGNVTDAVVNAGIEFNRYKQGAYNLKGYLNDDKFNKGGMDASDLIMTGRMGTAGRIQVRQCRSLPIPALQKGVNIGRRHLDLINDGNQCVKVFEYSADQINDPKLKKEWRTRALELRAWLVDNDRYHQDRVDSGLKDLSTNLSVNLDDPRLSRELQQTRIDCDNMMKENE
2146	fig|6666666.475224.peg.202	peg	2146_152469_152813	152469	152813	+	putative uncharacterised protein				atgcgtgtgaaaaagtcgactatcataatcgtctacctggcattcgttgcagtctttgtggtctgggcaagcaatgcgttggcagtcccggcgaacaatctgaacaaatgcgctgcatggctgtcaacgtatcaacagttccatcctgacgataaagatacttctattttgctttccgattttgaaggtgaaatgaaacgtttggaccagtacagtactgaccagattgagaatgctctggatttaccaatgatggattccgcagcagataacagtcaccaaactgctgtagacctgtcatattgccgtgagattgcgattaactttacccgtaatcaaaaataa	MRVKKSTIIIVYLAFVAVFVVWASNALAVPANNLNKCAAWLSTYQQFHPDDKDTSILLSDFEGEMKRLDQYSTDQIENALDLPMMDSAADNSHQTAVDLSYCREIAINFTRNQK
2146	fig|6666666.475224.peg.203	peg	2146_152863_153603	152863	153603	+	putative uncharacterised protein				atgaccgacaacgaaattgcccagatcattaagcagcattcccgttttgctccggatgctgctaatgtcatcatgctacacaaagacggacgtgtattctttgctgaaaaatttgagcaagggagccagttctgggatgctagcacgatgcttccacgtaccctacaaggtatcatctactcctgttctctggtagcgaagcggagcgatgctggtcattgggttagtgttaatgatctcggtggtattatgggtgggaaagaatatccgaccaaacgctccccgccgccttatgtcaaagaacagatgtccaagattaccaatcgcccaagaccgaccccgaaagaaccgaaagtcgaagtcgttcctgcaacggctgtagaaacaaaatcagccaaa…	MTDNEIAQIIKQHSRFAPDAANVIMLHKDGRVFFAEKFEQGSQFWDASTMLPRTLQGIIYSCSLVAKRSDAGHWVSVNDLGGIMGGKEYPTKRSPPPYVKEQMSKITNRPRPTPKEPKVEVVPATAVETKSAKKGTDWRSEFIGIKELDCERNPRNHPLFVSIRTDGKIILSKGLLDKIDGNFDFLVSKDRKVIALVKNGSMYNMNKSGNYSHKGLPKYLKFPEDSGTVRIYMDWDQEKNAFIGSL
2146	fig|6666666.475224.peg.204	peg	2146_153652_154359	153652	154359	+	putative uncharacterised protein				atgcacaatgtaacaaaactctatccgatcattatcggggccgatcaagggcacctgcatttatctgaaccctcatatatcgcctatgcccgcgccggcggatctcgatatgtgtattgtgaacacgatcatgggcgtggtacaggcctcctccactatacggtgaacgacactacgatggtccctctggcgccagaagacgtcgtgttggcccggcgcatttacattgaatttaatgcaatgcacaaaaacgaaatagacgctcgttatcatgcaatgcgttctatggaggggcgagattgtatttatcgtattgatcatttttctgaatttagccagtctatagattggttcatttctgacaagatcttgggtgaaaggatcatcacaactccttgg…	MHNVTKLYPIIIGADQGHLHLSEPSYIAYARAGGSRYVYCEHDHGRGTGLLHYTVNDTTMVPLAPEDVVLARRIYIEFNAMHKNEIDARYHAMRSMEGRDCIYRIDHFSEFSQSIDWFISDKILGERIITTPWAHAEQLRVSTDAYKEVDTLCNKFRISVTCNQDLGEEIQWKAQSPHFSDMEMWAETRSRAVVQLVLWAFYQRTPFSYMGQKTIDEILKSHAVDVENLIGRSAL
2146	fig|6666666.475224.peg.205	peg	2146_154356_154631	154356	154631	+	hypothetical protein				atgagcatgctatttgatgtctatctggttcatatcgccgctagtcaatcccaacgttctttcttcgtgctgttgccagcagataaaggtatgggtattgatgacttatctaccctggagcaccagttcttccaacgttggaaagacttggggcaccttgttaatttcaacaaattgactgatgagatcgctgcgcaagaaagtgacggtcttcgacttctttcacggtctgaattacaactaatcaggagtaaacatgagcagccgtatttttga	MSMLFDVYLVHIAASQSQRSFFVLLPADKGMGIDDLSTLEHQFFQRWKDLGHLVNFNKLTDEIAAQESDGLRLLSRSELQLIRSKHEQPYF
2146	fig|6666666.475224.peg.206	peg	2146_154612_154938	154612	154938	+	Superinfection exclusion protein				atgagcagccgtatttttgatctaaaattccgcgtttggcacgttcctcaggtgccgggggaaatgtttacagttgaagttccgacgtatgctgaagctgaacgtttgaaatcggcgctggctgattatgatctgttccagtattataacgacatcaagcctgattattgcaatgccagtggcattcagatttaccaacacgacctcacagaagaagaggtcgaagaaatgggccttgatgaccgttgggtggatatcgaggatgaccaagatctgcaggattatctggatcacctccgttctactggttgggaaataaaatcatga	MSSRIFDLKFRVWHVPQVPGEMFTVEVPTYAEAERLKSALADYDLFQYYNDIKPDYCNASGIQIYQHDLTEEEVEEMGLDDRWVDIEDDQDLQDYLDHLRSTGWEIKS
2146	fig|6666666.475224.peg.207	peg	2146_154935_155249	154935	155249	+	conserved uncharacterised protein				atgaccatgatcagttcttatatcgttcaaaaaggtgatacccttatggggatctgtatgaaattttattcggatccctatatgtattcagatatagcgaagtacaacaatatcattgatccaaacaaaatttgcgtcggccagctgattaaattcccccggcctgtcaatgacccacaaacagtcgttatcccggtagaacccactcagaaatgtttggatgctatcgcaggcttattccaggaaggattttgtgatggtcgtatagaaagagatatttatgccgtcatagtgagttcggctctgaaccaataa	MTMISSYIVQKGDTLMGICMKFYSDPYMYSDIAKYNNIIDPNKICVGQLIKFPRPVNDPQTVVIPVEPTQKCLDAIAGLFQEGFCDGRIERDIYAVIVSSALNQ
2146	fig|6666666.475224.peg.208	peg	2146_155367_155492	155367	155492	+	DNA binding protein				atgaatcgtcaagattttatcgcacatatcgcccaaactcagggtgtgaccaaaaccgaagctgaaaaaactatcgcgtcctttatcgctggtatcaactctgccgtcgctgctggccgggtgtga	MNRQDFIAHIAQTQGVTKTEAEKTIASFIAGINSAVAAGRV
2146	fig|6666666.475224.peg.209	peg	2146_155489_155722	155489	155722	+	putative DNA-binding protein				gtgaccaaaaccgaagctgaaaaaactatcgcgtcctttatcgctggtatcaactctgccgtcgctgctggccaatccgttcaactcgtcggattcggcaccttcgaagtgaaacatcaggaagcccgcgctggccgcaacccgctgaccggagctgcgctgacaatcgaagcgaaaaatgtcgtcaaattcaaggtcggcgaaactctgaaaaacgtcgccaacggcaaataa	MTKTEAEKTIASFIAGINSAVAAGQSVQLVGFGTFEVKHQEARAGRNPLTGAALTIEAKNVVKFKVGETLKNVANGK
2146	fig|6666666.475224.peg.210	peg	2146_155848_157569	155848	157569	+	DNA helicase, phage-associated			isu;Phage_replication	gtgacagcatttaaccagcatgccagagcgctggatactcttcgcagagaaataccgatagaagaaatccagaaattggccgaacgatattttccatatgaccacgccaaccccggccaaatggaatgtattgttgaagccatagatgctttggccaataagaaattcaaacacgtgattatcgaagctcctaccggagtcggtaaatccctcattggcacaactatccatcaggtgttacgccaccttgtgcttgaagcaaacccctatggccaattccgtacatccatttccacgccgaccaaaggtctacaagatcagtatgcggctgaaaaagctgttgctatcgatatcctgaaaggcaagaagaattatcgctgccatatgcatccggatatc…	MTAFNQHARALDTLRREIPIEEIQKLAERYFPYDHANPGQMECIVEAIDALANKKFKHVIIEAPTGVGKSLIGTTIHQVLRHLVLEANPYGQFRTSISTPTKGLQDQYAAEKAVAIDILKGKKNYRCHMHPDIYYNAVQCRIACRDGHCSKRRCPYVQARNLWTNISSLRCTNAAMMIEMCTTICMKPENRADMLILDECHKMPSTLLDHTIMEYNTKVLEGLRSLPQGKDIVQAVVEIVSHCKDYELGKLYSLDGYLFDRFVDLLGKVEAILTELHELVEDDRLTEAQVMKLADIIDTLHNLSDYCGIMSQTQASTFIVQEKGEEFIRFKPVMASDVSEFGLFRKADYHVHMSATICGIDAYARSLGIRPGQYHKIQIGNPIPIENRKVNYMPVMKMT…
2146	fig|6666666.475224.peg.211	peg	2146_158333_157566	158333	157566	-	hypothetical protein				atggctgaacgttcttatcgtttcagtttaaccgcagctgaaatcgaacgacttctcctgtccatacagaccgcaatacagaatgtagacatcatctatgactacgctgcaggcggtacacaaggccaggttgcggcagcgtctgcggtcaaaaacatgtggttgaaagtcaatgagatggtaacaggagaaggtctcaaagacgcaatcaacaatgctggcgacagcaacgttttcacagactattataagtcattattggatcgtgatggctggaaatttatcggctccccggcggatattttagcaagagacgatattgacaccaccaattttacaggtggcgaagtcatattgttgcagaaaaacgattcagggaacccggaattccaatattgg…	MAERSYRFSLTAAEIERLLLSIQTAIQNVDIIYDYAAGGTQGQVAAASAVKNMWLKVNEMVTGEGLKDAINNAGDSNVFTDYYKSLLDRDGWKFIGSPADILARDDIDTTNFTGGEVILLQKNDSGNPEFQYWKRTPVAGGDPIFNWTPVYEGGANDANIEIPVVGTSILKSIPKALFHMVEFRVHVYDKTQGHWQDTDGKIGFRGEDLIYSEYNNVQTQQLATIEYSMDSDDMIISLTSLAPNLKCRLSFIAGY
2146	fig|6666666.475224.peg.212	peg	2146_158375_158914	158375	158914	+	ribonuclease H				gtgattgaaatttacactgacggcgcttcatcgccacagactacacaagcggcgggatgggcatttgcagtcagcccaatttctggcggggcacaatggaatgtattctatggttatttgccaccgccttccacaaataatatagcagaactcttgggcgttattaatgctctgaaactcctttggaaattttctggttgtggtgagcgtaatattcccaaagcgacgattatatctgacagccagtatgtcatcaatagtgccaccaaatggcgttcgaaatgggaatatgagggcatgcctcccaagaatactgaattgcttcttgatttgttcaatatgtatgacaaagtttgttcaatttgtgaacttgaactaaaatgggtcaaaggtcatgcg…	MIEIYTDGASSPQTTQAAGWAFAVSPISGGAQWNVFYGYLPPPSTNNIAELLGVINALKLLWKFSGCGERNIPKATIISDSQYVINSATKWRSKWEYEGMPPKNTELLLDLFNMYDKVCSICELELKWVKGHAGTIGNEIADQWSVRAKENSSMVLENERFRVKKVVGSFNQFIGISEG
2146	fig|6666666.475224.peg.213	peg	2146_158918_159688	158918	159688	+	Gp55 sigma factor for late transcription				atgggcatgaatttcgtagacagaggggaaaacgtcaccaaatatttcactgacgaagacaatgagcgtgtcatcgcaatattacgtgactggatacccggaaggaaaaaggcgatagccgaagggaagcccctacccaagatcccgaattatgtggccgccaaagttcatatgatcatccacaaaatgagtacccgctacaactacagagattatcctttccgtgaagatatggtgagcgatgccgtcgccaatattcttcgatatttacacaccttcgacgtcagccatgtcggcaagaaagggaagatcaatttcttctcttgggtcaccatgtgtgctgatcgttcattcgcccgcaaattgaccatcgaagaagaacacacatatatcaaattg…	MGMNFVDRGENVTKYFTDEDNERVIAILRDWIPGRKKAIAEGKPLPKIPNYVAAKVHMIIHKMSTRYNYRDYPFREDMVSDAVANILRYLHTFDVSHVGKKGKINFFSWVTMCADRSFARKLTIEEEHTYIKLRSFEDAGGFAAFSDDPDFQTQTFVDNTGITMDFRERIGHFENKKESQREKERQKQADLKEDEKNKKIPKGILQCLRGPQNNATAQAEDDSEQDFGKTQFSLEEIMDSPTLLSELSGEKNNGDC
2146	fig|6666666.475224.peg.214	peg	2146_159675_160793	159675	160793	+	Gp47 recombination protein subunit				atggcgattgctaagatcggcgatttacacatcgggagccgcaatggctctcgttatgttcgtgacttcattaagaattatctcatcaactatttcattcctgaactcgttgatgccgatatcaaagaagtctggcaattcggtgatacatttgatgtccgcaaattcatgtatgggcgcgacaaagattggctaaaatatgatctggccccggcgttgcgcgctgctggtatcaaatggaatggtctgatcggtaaccatgacattactttggaagagtccaaccgcatcaactggccttcttatttggttgaacttgctcccgatgtctttacttactactcagaaccgacggaagttatggtcgagggcaaaaaagttctggtgcttccgtggatc…	MAIAKIGDLHIGSRNGSRYVRDFIKNYLINYFIPELVDADIKEVWQFGDTFDVRKFMYGRDKDWLKYDLAPALRAAGIKWNGLIGNHDITLEESNRINWPSYLVELAPDVFTYYSEPTEVMVEGKKVLVLPWINKENYARSVQMLQDTDAEFCFAHLELAGFKMYQSSTCDHGQIDLSLLSKFTRVDTGHFHTRSFEGNVQYLGTPYHLTWEDHKDGDNRGFYVDDLTEGGELFIPNNASQTLFRYVEYDYTKLSSDDEGNWIDPEWLNTKLGIEGQIVKIIVTNRDNSKHYEKFCDAMKRCKCIDYNFIDKTVTVSAEKVEVTEEMIATDAVEVLKNDIRAADNIQRPESVCKLAEAFYTAAQQRLNTLDA
