# Supplementary material for: Klebsiella virus UPM2146 lyses multiple drug-resistant Klebsiella pneumoniae in vitro and in vivo
Source: PLoS One. 2021 Jan 8;16(1):e0245354. doi: 10.1371/journal.pone.0245354 (PMC7794032; doi:10.1371/journal.pone.0245354)
Supplement: S2 Table — (XLSX) [file pone.0245354.s004.xlsx]

## Sheet: MatrixOutput
AUG87844.1_endolysin_Klebsiella_phage_Menlow		0.00372719	0.00370693	0.00521777	0.00647388	0.0113268	0.0244811	0.0245491	0.0257999	0.025029	0.0259725	0.0261096	0.0259725	0.0249634	0.025616	0.0263894	0.0259725	0.0263894	0.0265199	0.0267931	0.0485159	0
AUV59125.1_peptidoglycan_binding_protein_Klebsiella_virus_vB_KpnM_KpS110	0.00383878		0.00515848	0.00633597	0.0075736	0.0119836	0.0249086	0.0249671	0.0261654	0.0254231	0.0263417	0.0264687	0.0263417	0.0253765	0.025995	0.0267621	0.0263417	0.0267621	0.0268749	0.0271161	0.0485159	0.00372719
YP_008531963.1_phage-encoded_peptidoglycan_binding_protein_Klebsiella_virus_0507KN21	0.00383878	0.00769235		0.00636588	0.00733216	0.0118584	0.0249355	0.0250427	0.0257999	0.0255636	0.0259725	0.0261096	0.0259725	0.0255104	0.0261641	0.0263894	0.0259725	0.0263894	0.0265199	0.0267931	0.0485159	0.00370693
QBQ78849.1_hypothetical_protein_KWBSE43_00021_Escherichia_phage_vB_EcoM_KWBSE43-6	0.00769235	0.0115608	0.0115608		0.00834201	0.01139	0.0244584	0.0245036	0.0258941	0.0249768	0.0260845	0.0261603	0.0260845	0.0249703	0.0255809	0.0265238	0.0260845	0.0265238	0.0265747	0.0268537	0.0488234	0.00521777
AUG88056.1_endolysin_Klebsiella_phage_May	0.0115608	0.0154443	0.0154443	0.019343		0.00896063	0.0254429	0.0255714	0.0255382	0.0259813	0.0257433	0.0259148	0.0257433	0.0259336	0.0265996	0.0261582	0.0257433	0.0261582	0.0263313	0.0268807	0.0481358	0.00647388
YP_009616095.1_putative_peptidoglycan_binding_protein_Serratia_phage_vB_Sru_IME250	0.0350913	0.0390675	0.0390675	0.0350913	0.0232569		0.0255899	0.0257164	0.0261772	0.025924	0.0264382	0.0264945	0.0264382	0.0259621	0.0265404	0.0268649	0.0264382	0.0268649	0.0268802	0.027636	0.0475786	0.0113268
YP_003358573.1_conserved_hypothetical_phage_protein_Shigella_phage_Ag3	0.157349	0.161843	0.161843	0.161843	0.170893	0.175449		0.00874989	0.0234482	0.0132991	0.0236855	0.0240235	0.0242593	0.010087	0.0139981	0.0242593	0.0242593	0.0242593	0.0251597	0.02489	0.0519307	0.0244811
YP_007236183.1_hypothetical_protein_Salmonella_phage_SKML-39	0.157349	0.161843	0.161843	0.161843	0.170893	0.175449	0.019343		0.0230726	0.00948441	0.0233451	0.0237277	0.0228433	0.0112294	0.0102581	0.0228433	0.0228433	0.0228433	0.0239614	0.0233007	0.0516074	0.0245491
YP_004327457.1_phage-encoded_peptidoglycan_binding_protein_Salmonella_virus_ViI	0.166358	0.170893	0.166358	0.170893	0.161843	0.170893	0.143985	0.13957		0.0249458	0.00375313	0.00386637	0.00759681	0.0227786	0.0253549	0.00869537	0.00533087	0.00777768	0.00932947	0.0102553	0.0479325	0.0257999
YP_007237392.1_putative_endolysin_Dickeya_virus_Limestone	0.157349	0.161843	0.161843	0.161843	0.170893	0.175449	0.0430595	0.0232569	0.157349		0.0252143	0.0255115	0.0246556	0.0112333	0.00375311	0.0246556	0.0246556	0.0246556	0.0256326	0.0251902	0.0507557	0.025029
AVZ44932.1_hypothetical_protein_Escherichia_phage_EP75	0.170893	0.175449	0.170893	0.175449	0.166358	0.175449	0.14842	0.143985	0.00383878	0.161843		0.00533588	0.00759681	0.0230454	0.0256105	0.00869537	0.00533087	0.00777768	0.00932947	0.0102553	0.0479325	0.0259725
AGF89070.1_hypothetical_protein_SP029_00440_Salmonella_phage_FSL_SP-029	0.170893	0.175449	0.170893	0.175449	0.166358	0.175449	0.14842	0.143985	0.00383878	0.161843	0.00769235		0.00852289	0.0233692	0.0259091	0.00950424	0.00661419	0.00865031	0.00845677	0.0109332	0.0479325	0.0261096
YP_004957781.1_orf102_gene_product_Escherichia_virus_CBA120	0.170893	0.175449	0.170893	0.175449	0.166358	0.175449	0.152874	0.13957	0.0154443	0.157349	0.0154443	0.019343		0.023595	0.0250813	0.00382108	0.00520191	0.00539258	0.00544286	0.00840276	0.047669	0.0259725
BBD52272.1_putative_endolysin_Enterobacter_phage_phiEM4	0.161843	0.166358	0.166358	0.166358	0.175449	0.180025	0.0271861	0.0311309	0.135175	0.0311309	0.13957	0.13957	0.143985		0.0120776	0.023595	0.023595	0.023595	0.0245291	0.024239	0.0516141	0.0249634
AIM51349.1_putative_peptidoglycan_binding_domain_protein_Dickeya_phage_phiD3	0.161843	0.166358	0.166358	0.166358	0.175449	0.180025	0.0470675	0.0271861	0.161843	0.00383878	0.166358	0.166358	0.161843	0.0350913		0.0250813	0.0250813	0.0250813	0.0260216	0.0256687	0.0511094	0.025616
AUG88272.1_endolysin_Salmonella_phage_Mutine	0.175449	0.180025	0.175449	0.180025	0.170893	0.180025	0.152874	0.13957	0.019343	0.157349	0.019343	0.0232569	0.00383878	0.143985	0.161843		0.00662088	0.00539258	0.00661408	0.00924045	0.0484359	0.0263894
YP_009021289.1_peptidoglycan_binding_protein_Salmonella_phage_vB_SalM_SJ2	0.170893	0.175449	0.170893	0.175449	0.166358	0.175449	0.152874	0.13957	0.00769235	0.157349	0.00769235	0.0115608	0.00769235	0.143985	0.161843	0.0115608		0.00544786	0.00751247	0.00846796	0.0478055	0.0259725
YP_004895251.1_unnamed_protein_product_Salmonella_phage_SFP10	0.175449	0.180025	0.175449	0.180025	0.170893	0.180025	0.152874	0.13957	0.0154443	0.157349	0.0154443	0.019343	0.00769235	0.143985	0.161843	0.00769235	0.00769235		0.00773488	0.00832633	0.0489145	0.0263894
ASZ77627.1_putative_peptidoglycan_binding_protein_Salmonella_phage_SP1	0.180025	0.184623	0.180025	0.184623	0.175449	0.184623	0.161843	0.14842	0.0232569	0.166358	0.0232569	0.019343	0.00769235	0.152874	0.170893	0.0115608	0.0154443	0.0154443		0.0101241	0.047669	0.0265199
YP_009220916.1_putative-encoded_peptidoglycan_binding_protein_Salmonella_phage_38	0.184623	0.189242	0.184623	0.189242	0.184623	0.193882	0.161843	0.14842	0.0271861	0.166358	0.0271861	0.0311309	0.019343	0.152874	0.170893	0.0232569	0.019343	0.019343	0.0271861		0.0482039	0.0267931
YP_009147574.1_putative_peptidoglycan_binding_protein_Erwinia_phage_phiEa2809	0.495616	0.495616	0.495616	0.501925	0.495616	0.489347	0.547241	0.54064	0.495616	0.527568	0.495616	0.495616	0.489347	0.54064	0.534082	0.495616	0.489347	0.501925	0.489347	0.495616		0.0485159
UPM 2146 putative phage-encoded peptidoglycan binding protein	0	0.00383878	0.00383878	0.00769235	0.0115608	0.0350913	0.157349	0.157349	0.166358	0.157349	0.170893	0.170893	0.170893	0.161843	0.161843	0.175449	0.170893	0.175449	0.180025	0.184623	0.495616

## Sheet: Caption
Table. Estimates of Evolutionary Divergence between Sequences
The number of amino acid substitutions per site from between sequences are shown. Standard error estimate(s) are shown above the diagonal. Analyses were conducted using the Poisson correction model [1]. This analysis involved 22 amino acid sequences. All ambiguous positions were removed for each sequence pair (pairwise deletion option). There were a total of 261 positions in the final dataset. Ev…
1. Zuckerkandl E. and Pauling L. (1965). Evolutionary divergence and convergence in proteins. Edited in Evolving Genes and Proteins by V. Bryson and H.J. Vogel, pp. 97-166. Academic Press, New York.
2. Kumar S., Stecher G., Li M., Knyaz C., and Tamura K. (2018). MEGA X: Molecular Evolutionary Genetics Analysis across computing platforms. Molecular Biology and Evolution 35:1547-1549.
Disclaimer: Although utmost care has been taken to ensure the correctness of the caption, the caption text is provided "as is" without any warranty of any kind. Authors advise the user to carefully check the caption prior to its use for any purpose and report any errors or problems to the authors immediately (www.megasoftware.net). In no event shall the authors and their employers be liable for a…
